# Supplementary material
Source: MDPI journal article supplement (https://www.mdpi.com/2072-4292/13/3/474)
Supplement: s1 [file s1]

## Supplementary material

**Table S1.** Percentage of pixels of bare soil frequency classes for the monthly-average over the four-years of Ferrara region.

| Bare soil frequency class | January | February | March | April | May   | June  | July  | August | September | October | November | December |
|---------------------------|---------|----------|-------|-------|-------|-------|-------|--------|-----------|---------|----------|----------|
| 100%                      | 0.01    | 0.94     | 7.67  | 13.06 | 0.06  | 0.49  | 4.02  | 10.32  | 8.23      | 0.82    | 0.68     | 0.00     |
| 75%                       | 0.09    | 4.96     | 5.66  | 2.26  | 0.42  | 1.70  | 7.30  | 6.41   | 9.75      | 9.21    | 0.07     | 0.01     |
| 50%                       | 0.19    | 4.99     | 3.68  | 2.15  | 4.71  | 6.51  | 1.83  | 7.58   | 7.80      | 7.78    | 0.87     | 0.09     |
| 25%                       | 1.27    | 6.35     | 4.56  | 1.69  | 2.90  | 7.49  | 9.67  | 4.13   | 10.04     | 17.36   | 0.02     | 3.89     |
| 0%                        | 98.45   | 82.76    | 78.43 | 80.84 | 91.90 | 83.81 | 77.19 | 71.56  | 64.18     | 64.83   | 98.36    | 96.01    |

**Table S2.** Percentage of pixels of bare soil frequency classes for the monthly-average over the four-years of Roma region.

| Bare soil frequency class | January | February | March | April | May   | June  | July  | August | September | October | November | December |
|---------------------------|---------|----------|-------|-------|-------|-------|-------|--------|-----------|---------|----------|----------|
| 100%                      | 0.00    | 0.37     | 0.79  | 0.55  | 0.22  | 0.62  | 5.74  | 4.16   | 1.34      | 1.03    | 1.06     | 0.00     |
| 75%                       | 0.08    | 1.01     | 1.51  | 0.32  | 0.20  | 2.19  | 6.12  | 5.65   | 4.21      | 3.34    | 0.12     | 0.08     |
| 50%                       | 0.60    | 0.83     | 0.86  | 0.71  | 0.46  | 2.27  | 7.99  | 6.17   | 7.42      | 4.32    | 1.22     | 0.60     |
| 25%                       | 0.65    | 2.48     | 2.10  | 0.72  | 0.84  | 4.55  | 6.25  | 6.82   | 8.02      | 4.08    | 0.35     | 0.65     |
| 0%                        | 98.66   | 95.31    | 94.74 | 97.70 | 98.28 | 90.38 | 73.91 | 77.20  | 79.01     | 87.23   | 97.24    | 98.66    |

**Table S3.** Percentage of pixels of bare soil frequency classes for the monthly-average over the four-years of Capitanata region.

| Bare soil frequency class | January | February | March | April | May   | June  | July  | August | September | October | November | December |
|---------------------------|---------|----------|-------|-------|-------|-------|-------|--------|-----------|---------|----------|----------|
| 100%                      | 0.04    | 0.24     | 2.12  | 0.00  | 2.14  | 14.87 | 40.67 | 54.74  | 54.33     | 13.70   | 5.11     | 0.04     |
| 75%                       | 0.29    | 1.68     | 2.81  | 0.00  | 2.13  | 36.49 | 24.63 | 14.48  | 17.14     | 27.55   | 1.69     | 0.29     |
| 50%                       | 1.88    | 4.48     | 3.36  | 5.36  | 3.79  | 0.03  | 3.32  | 3.01   | 0.02      | 27.92   | 0.63     | 1.88     |
| 25%                       | 11.61   | 4.47     | 4.10  | 0.01  | 3.44  | 24.22 | 7.17  | 5.55   | 9.59      | 5.45    | 0.75     | 11.61    |
| 0%                        | 86.18   | 89.13    | 87.62 | 94.63 | 88.50 | 24.40 | 24.22 | 22.22  | 18.93     | 25.38   | 91.81    | 86.18    |

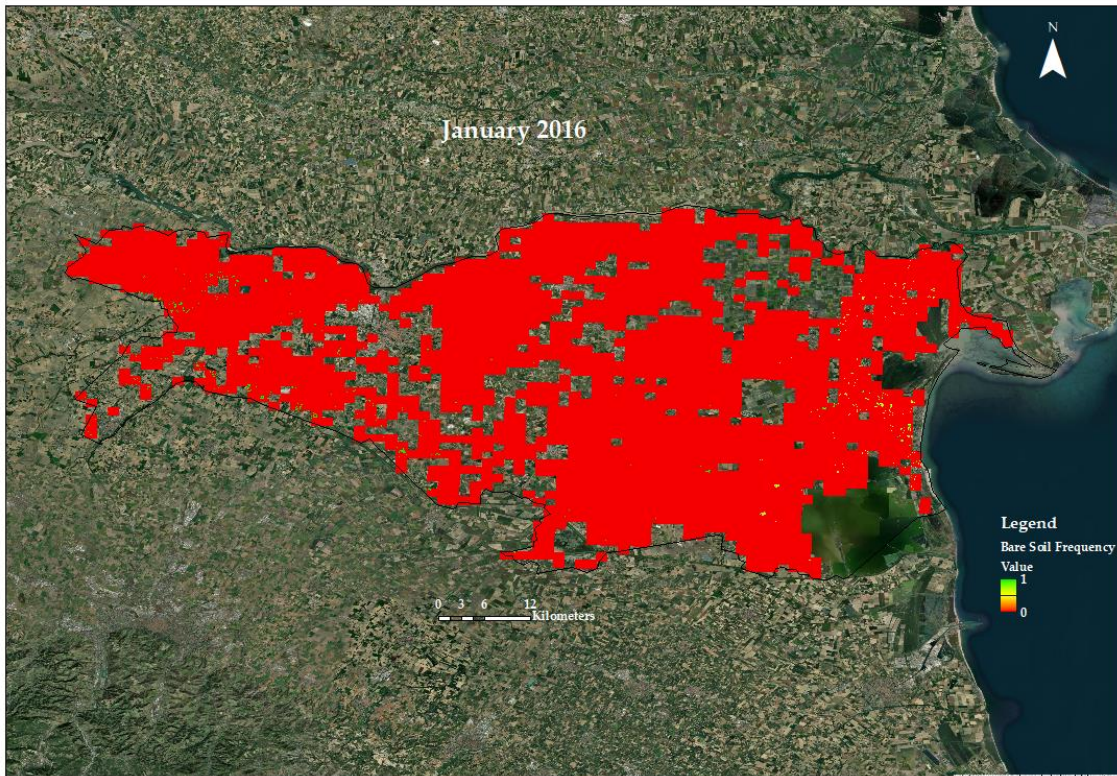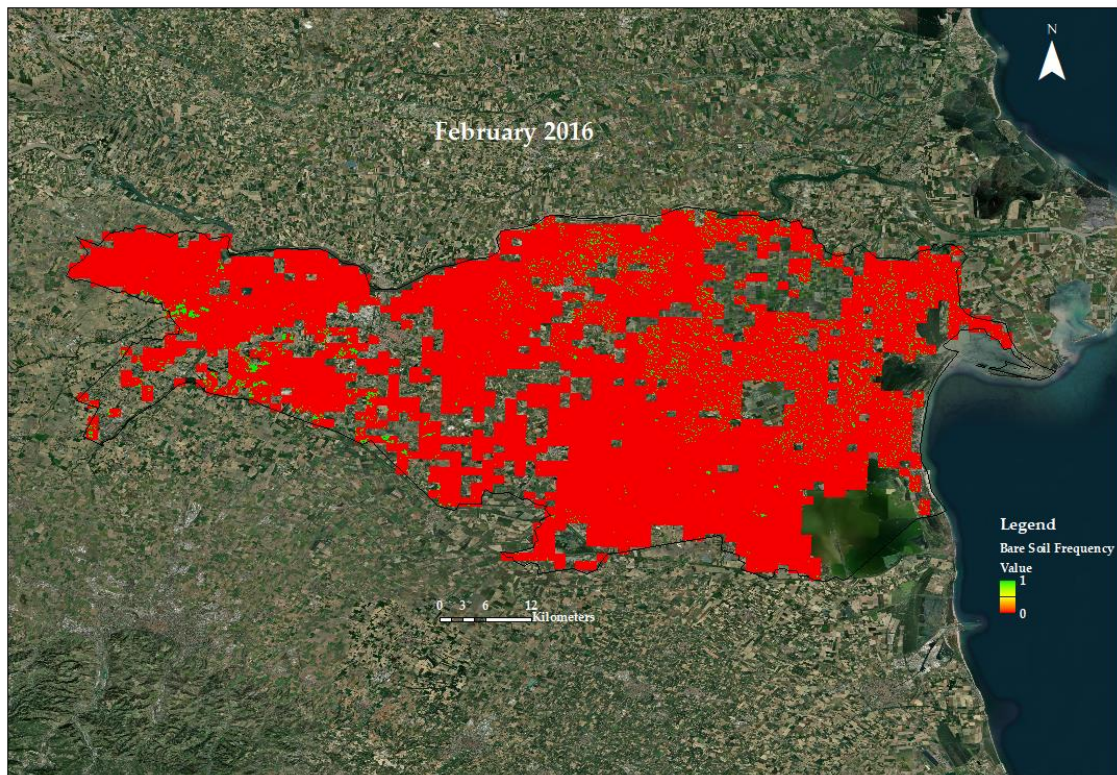

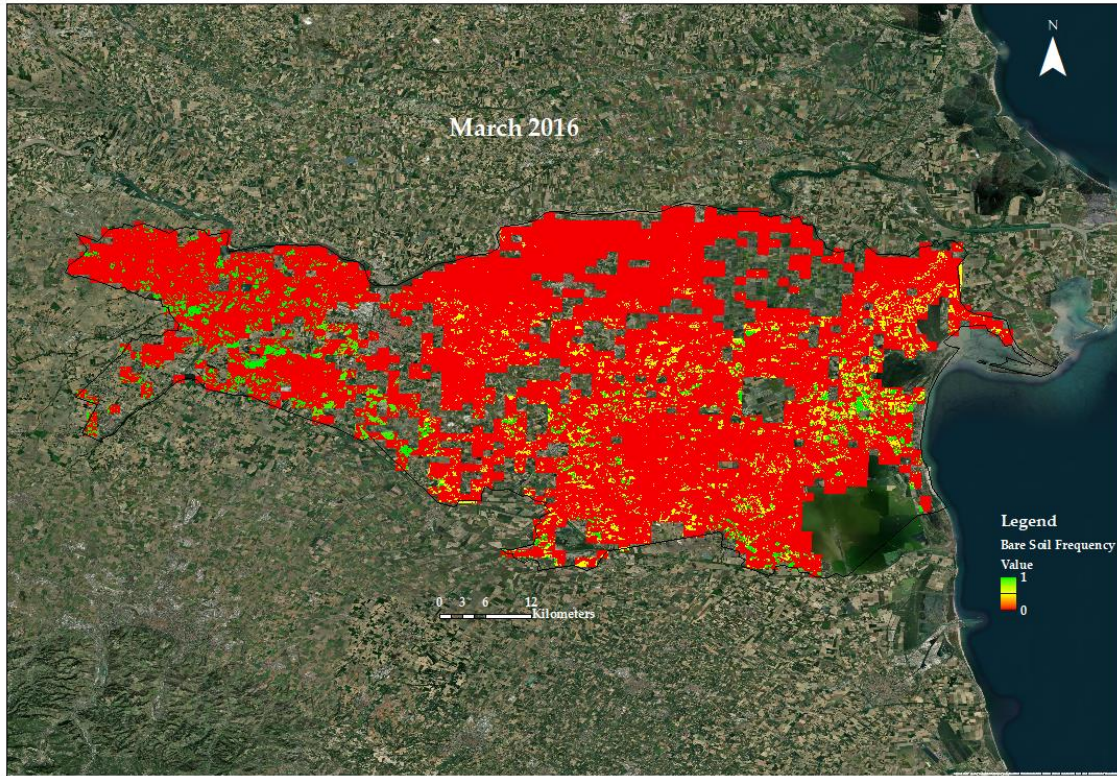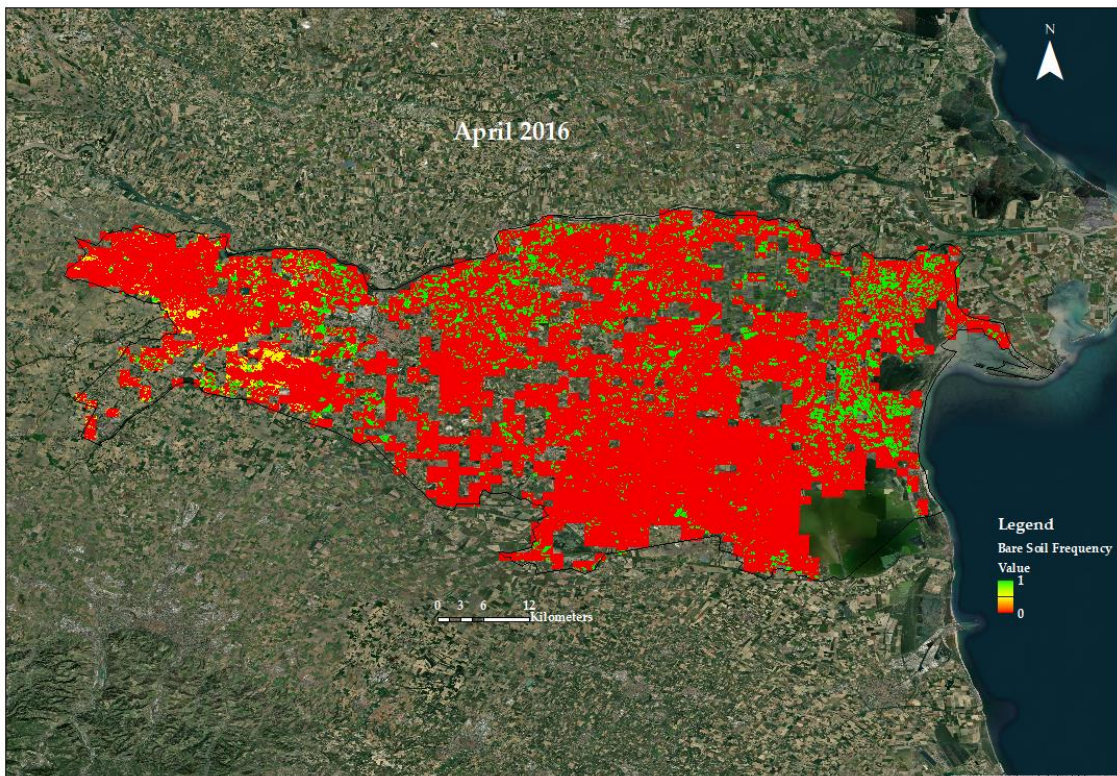

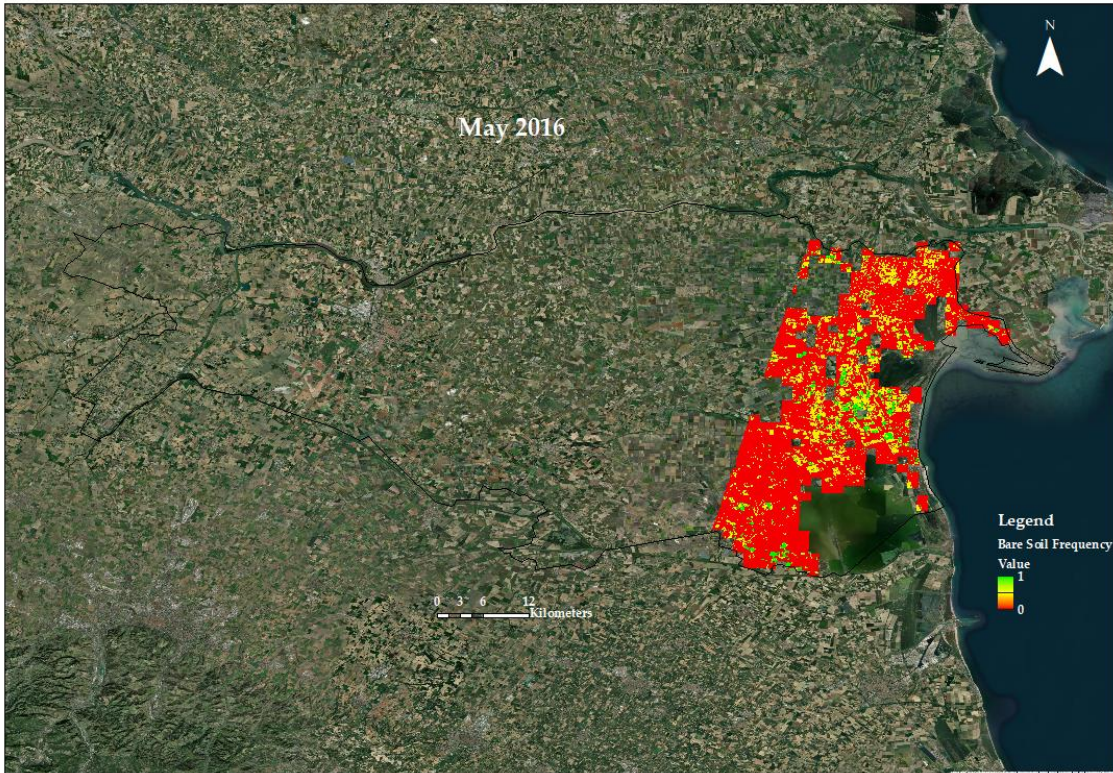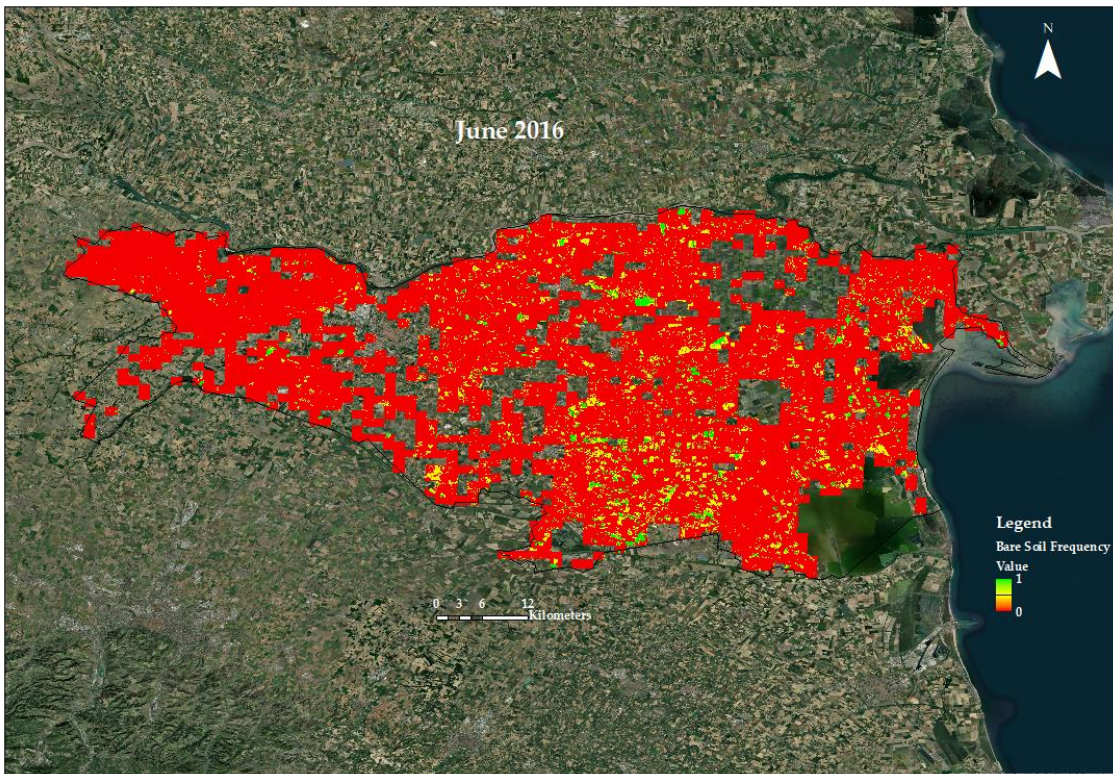

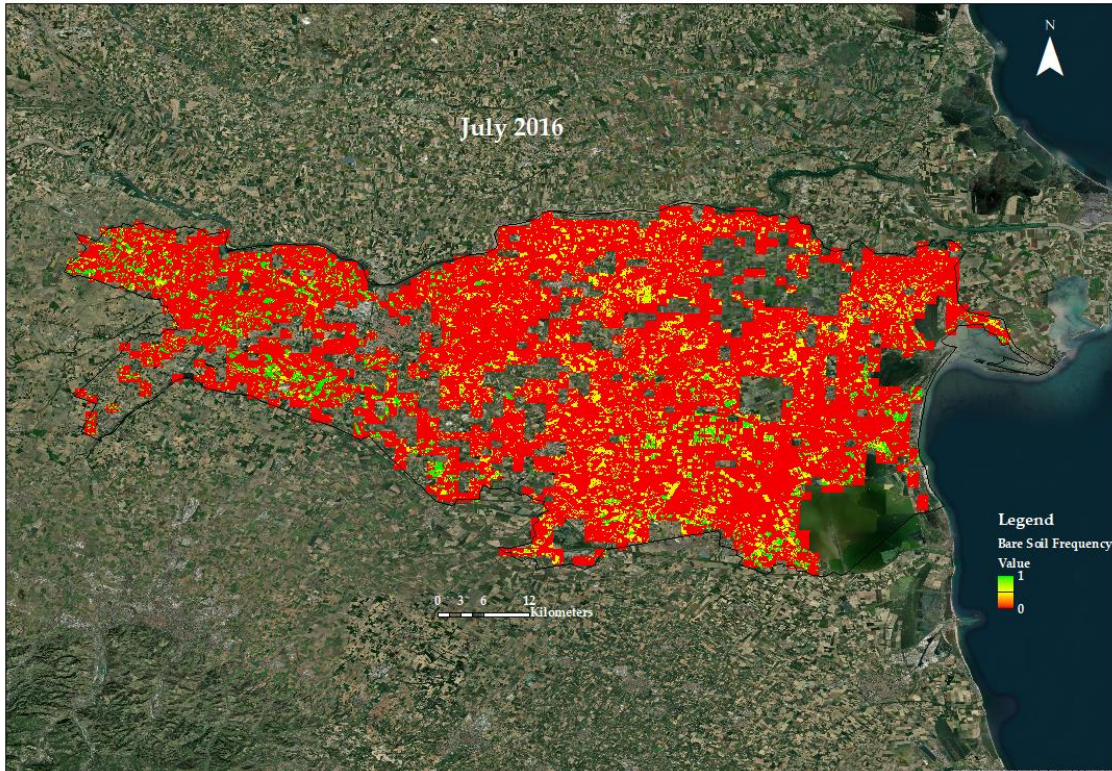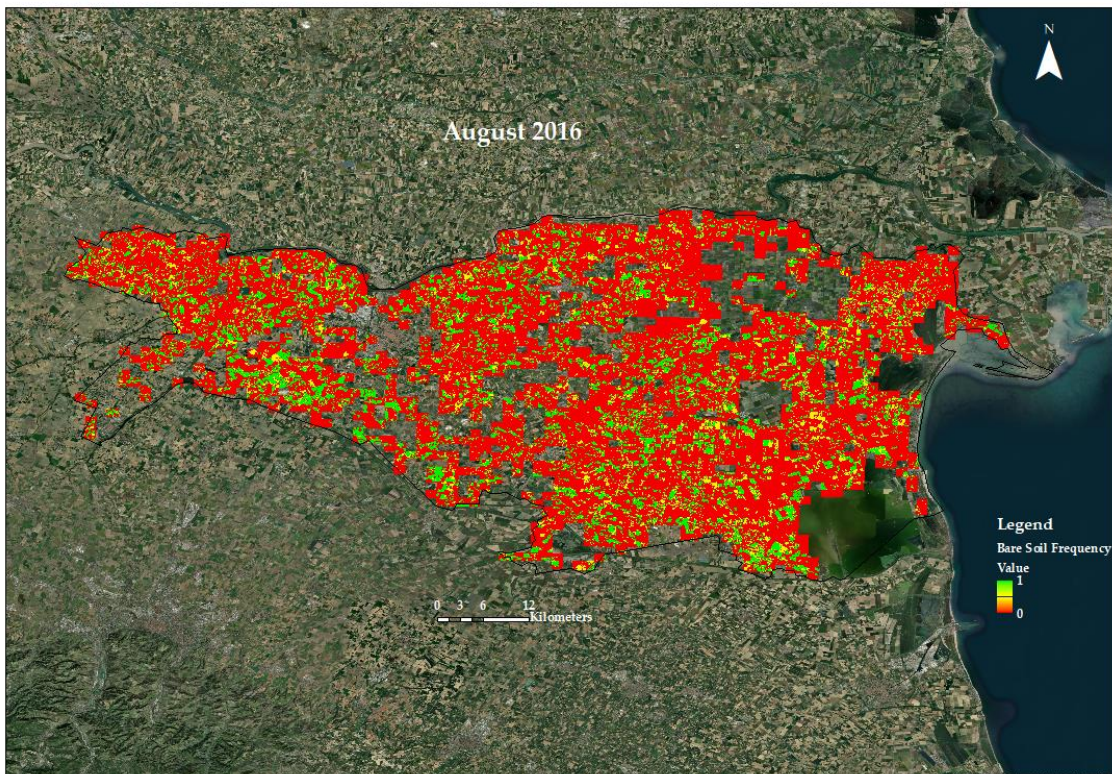

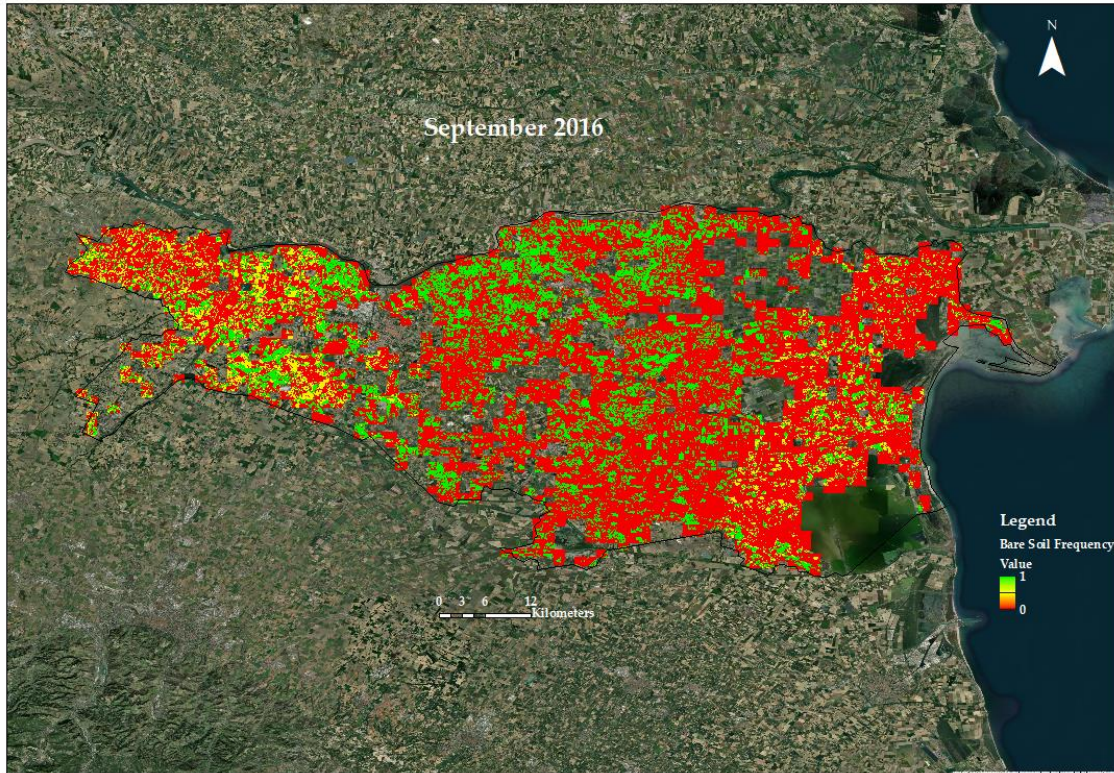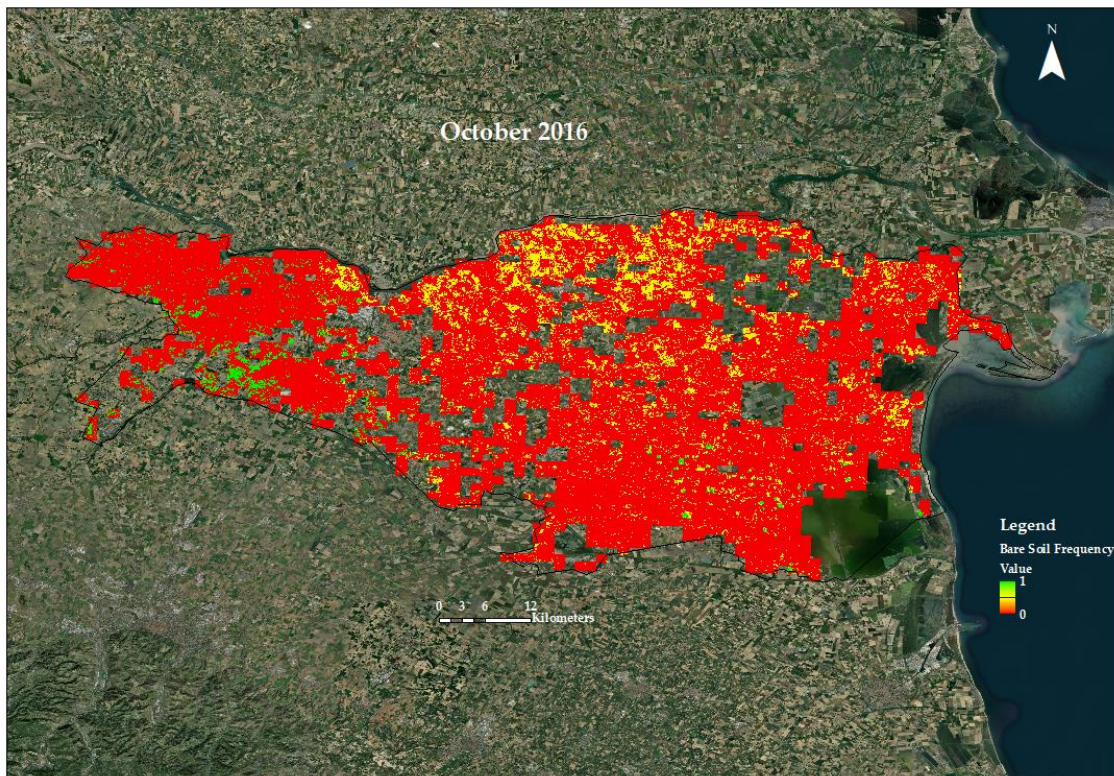

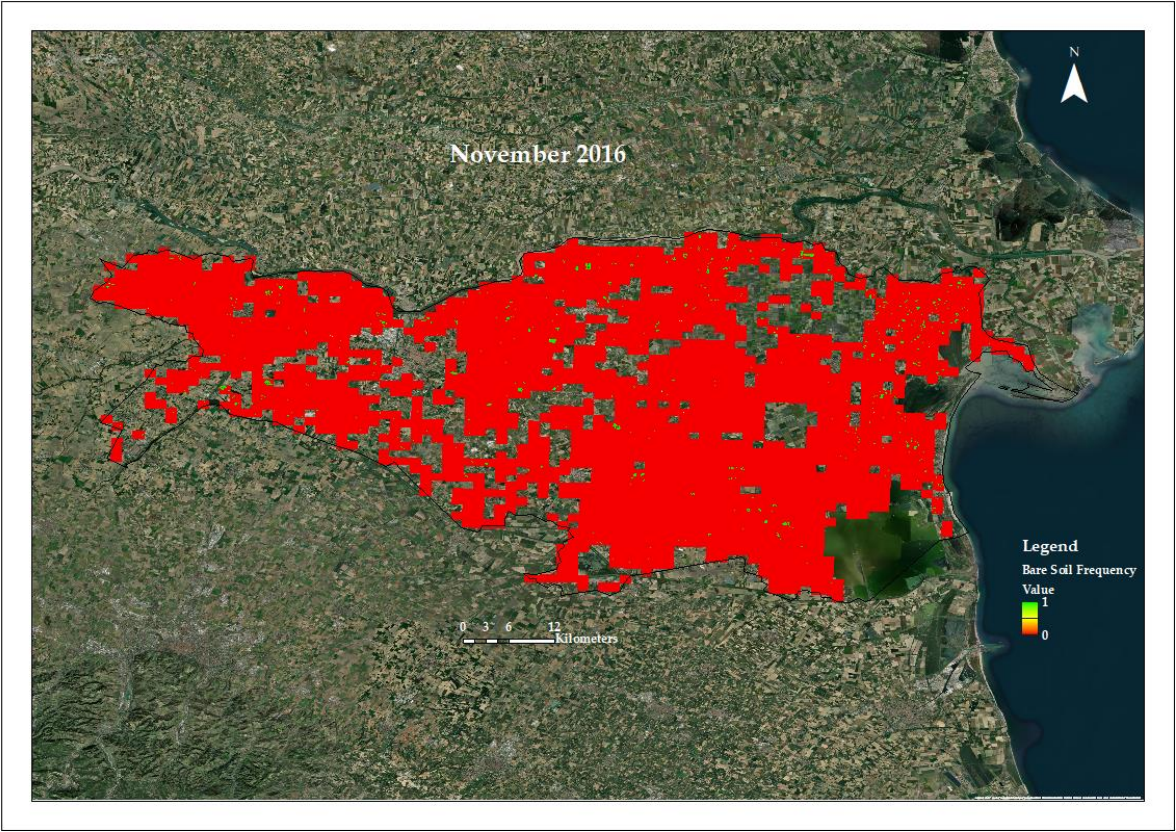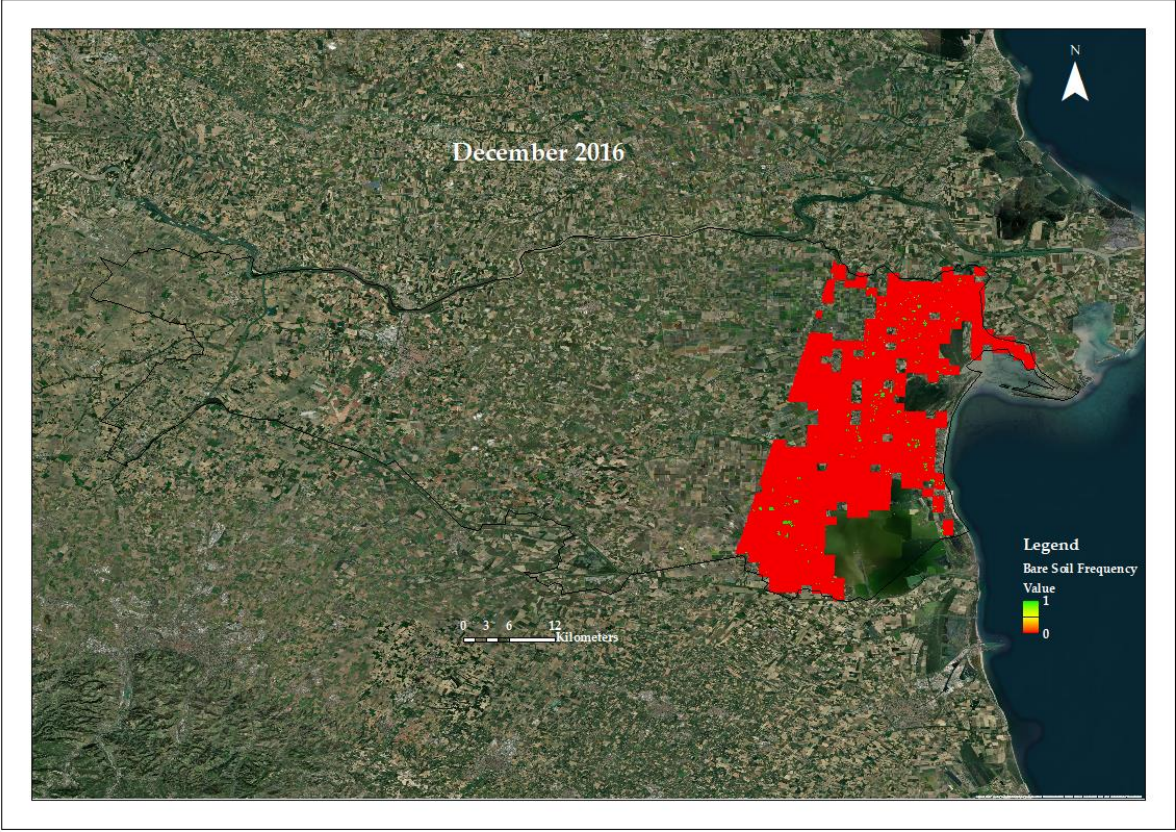

Figure S1. Yearly Bare Soil Frequency of the Ferrara region for the agricultural year 2016.

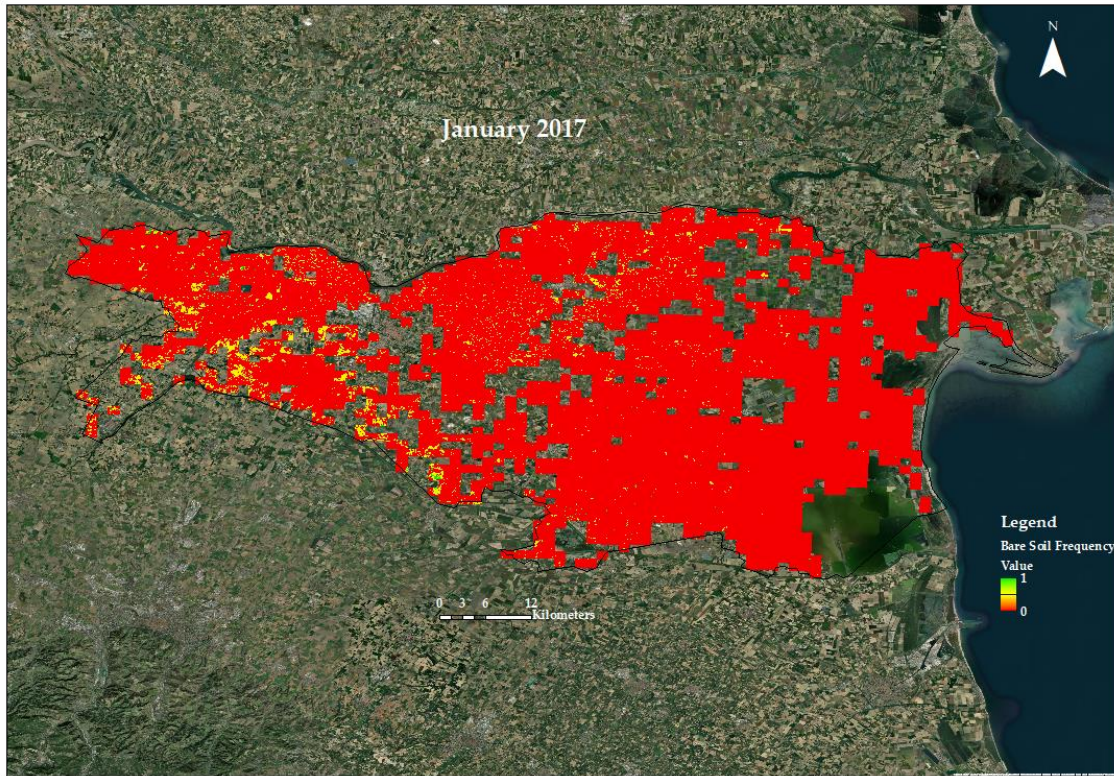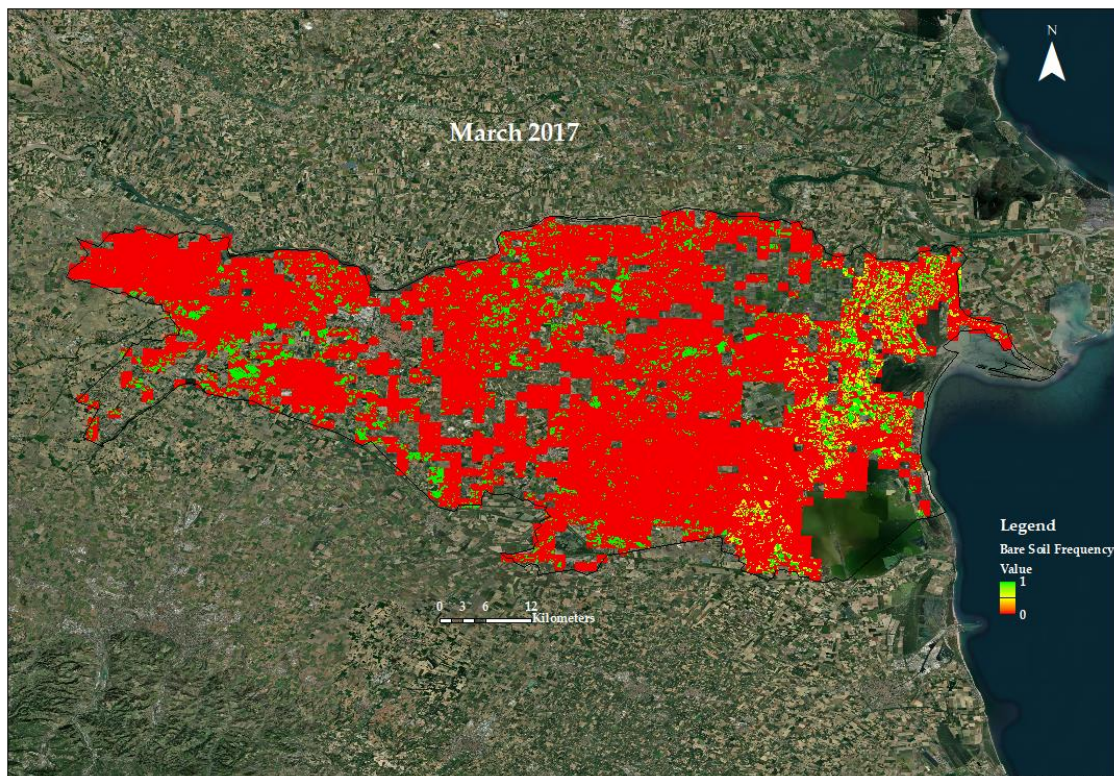



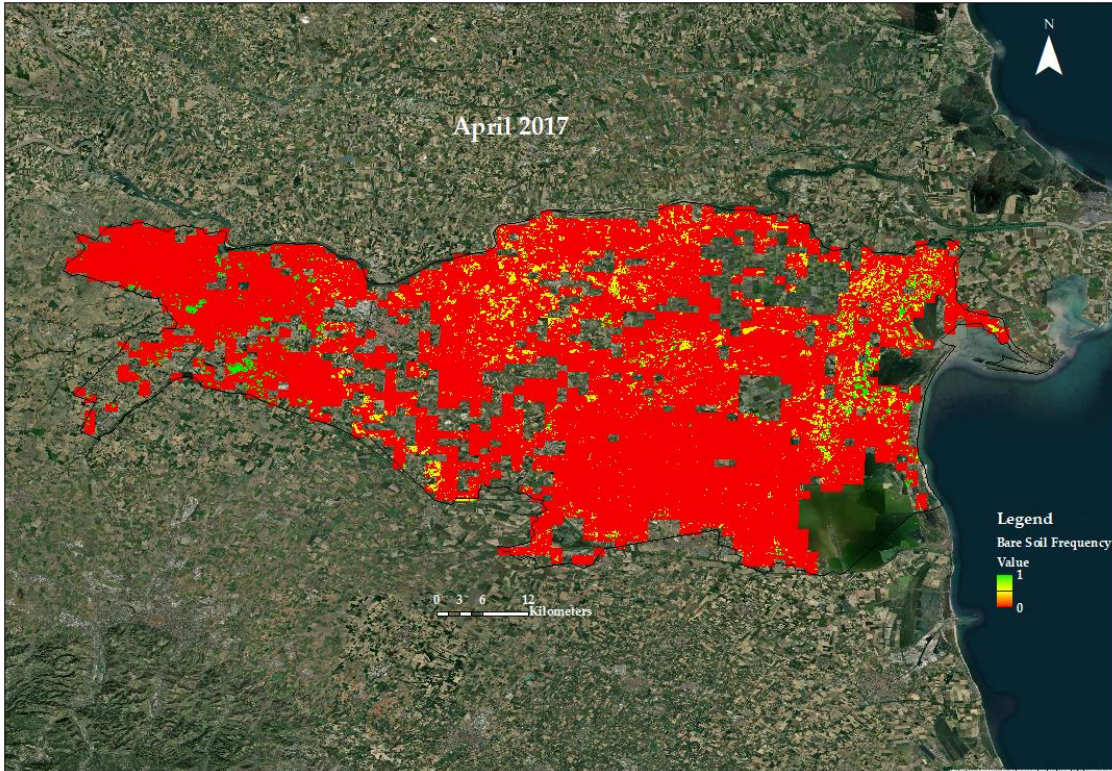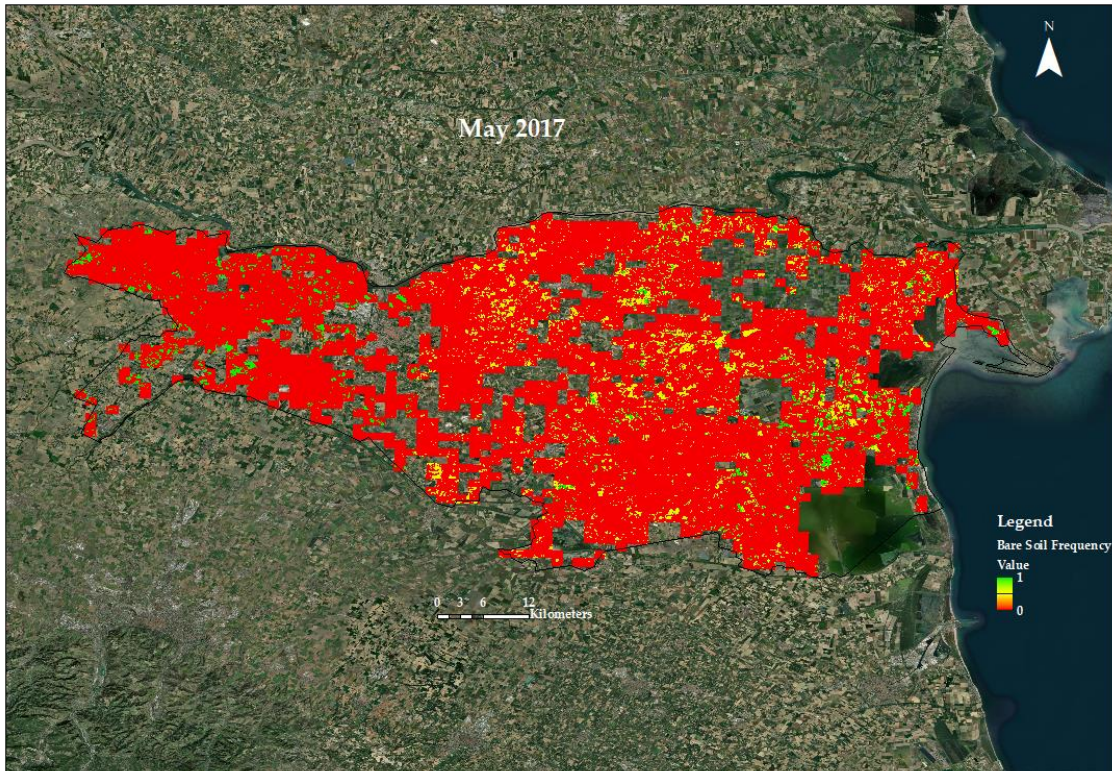

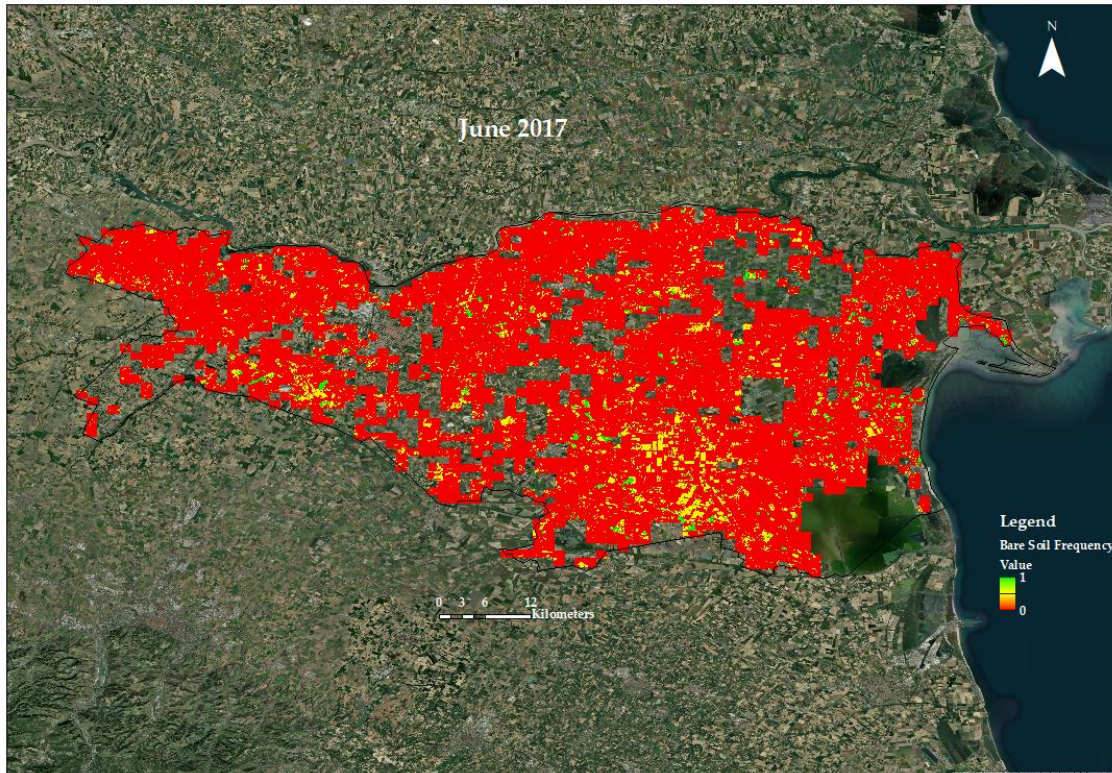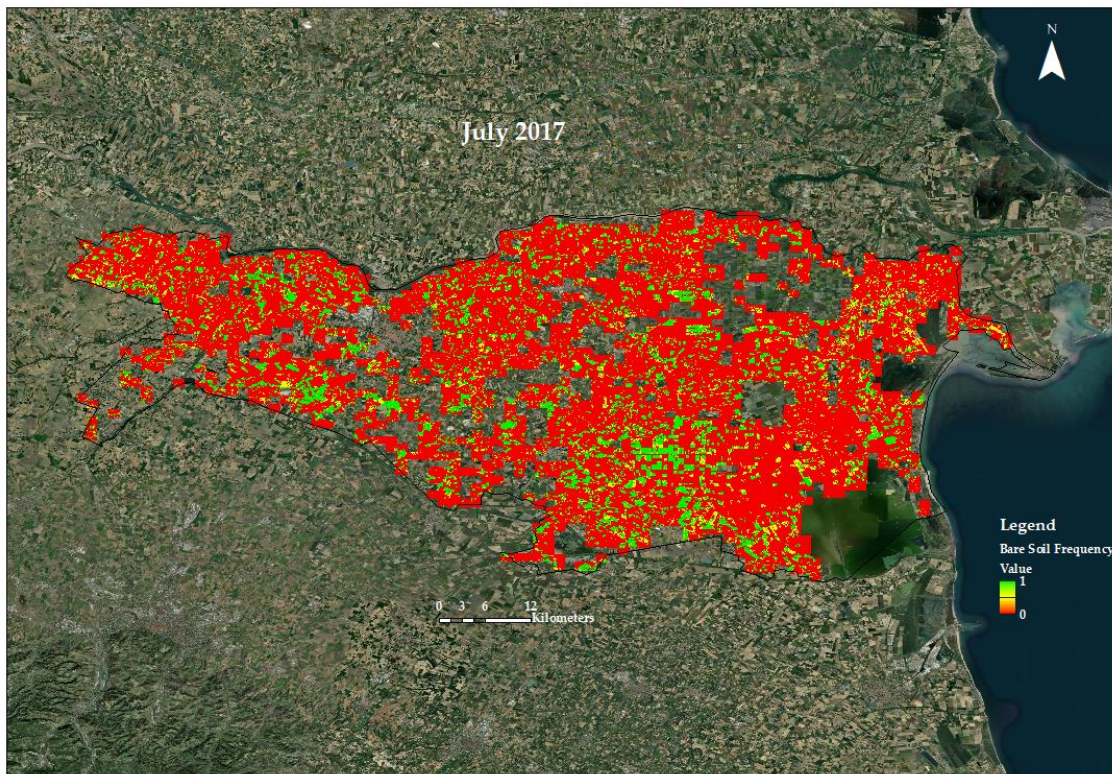

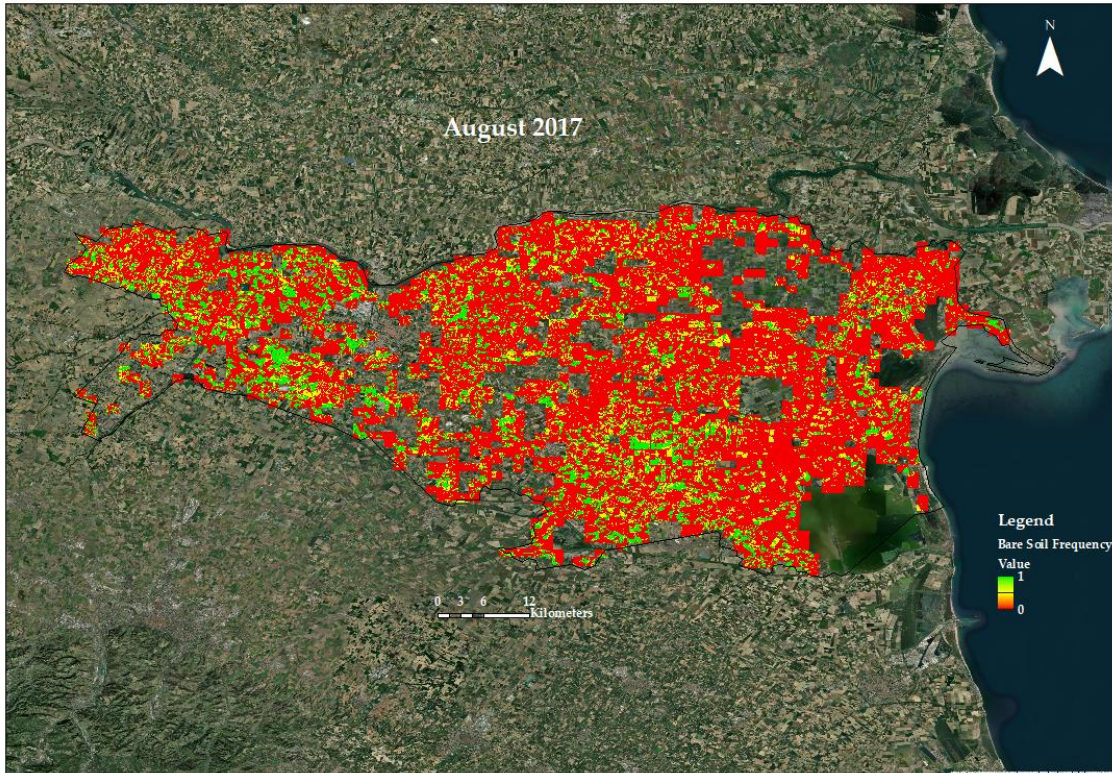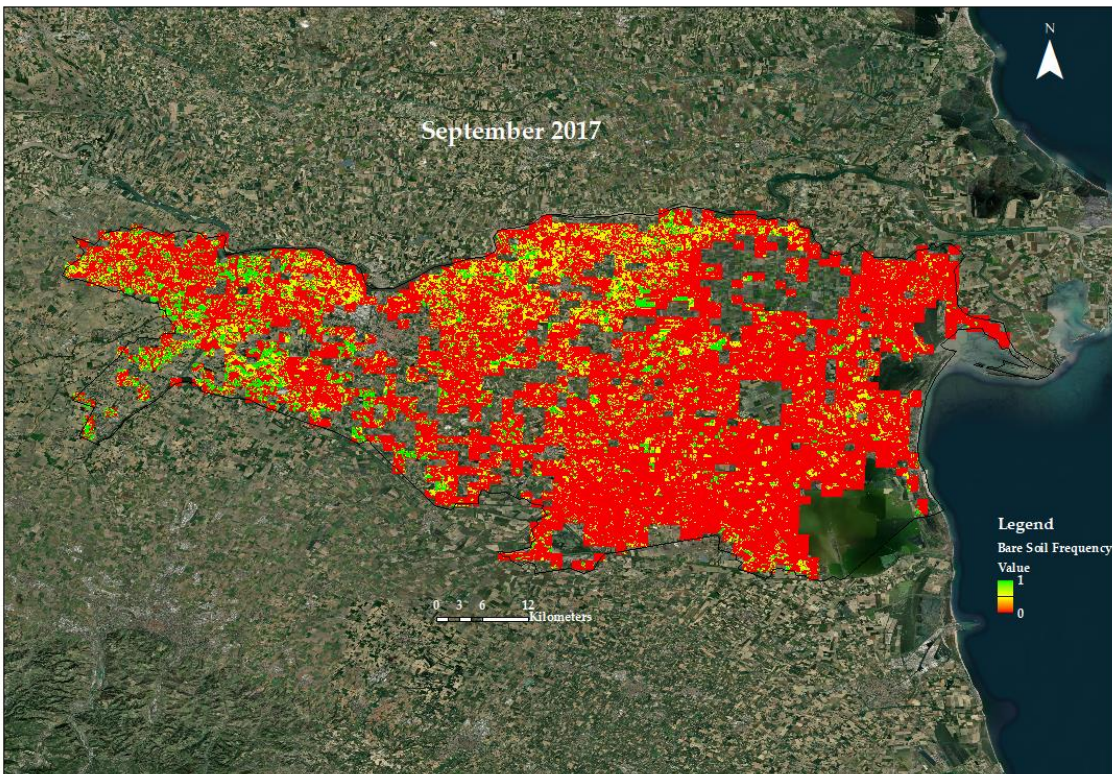

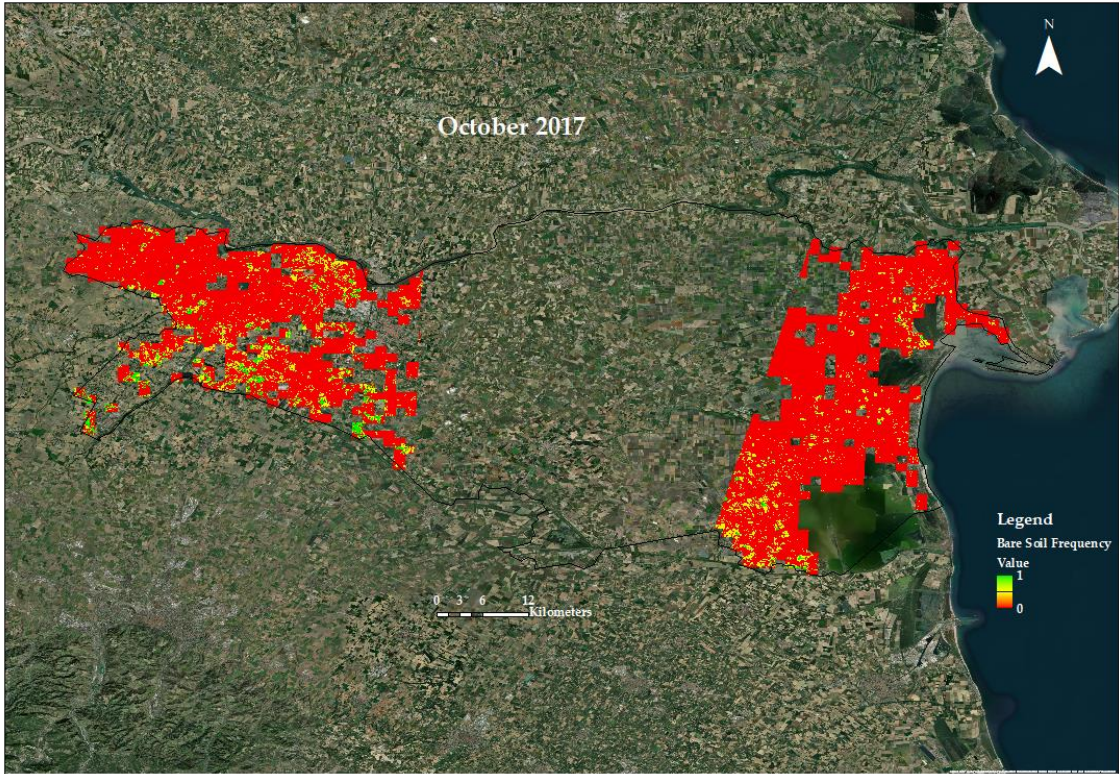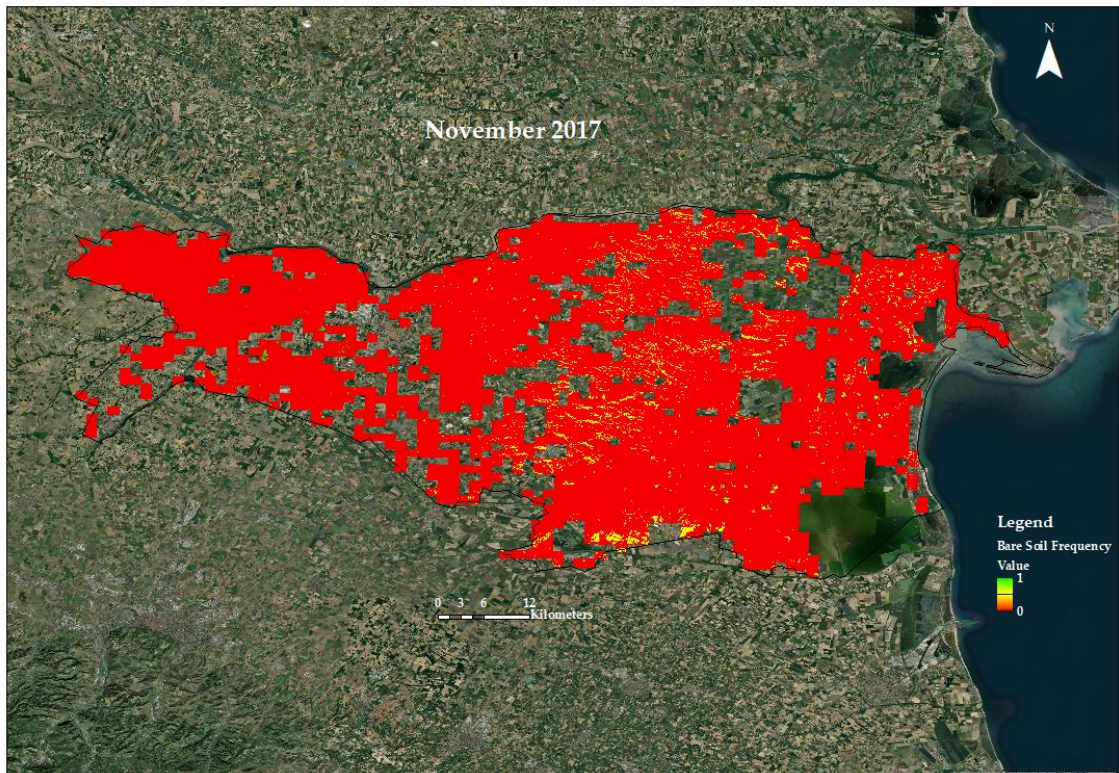

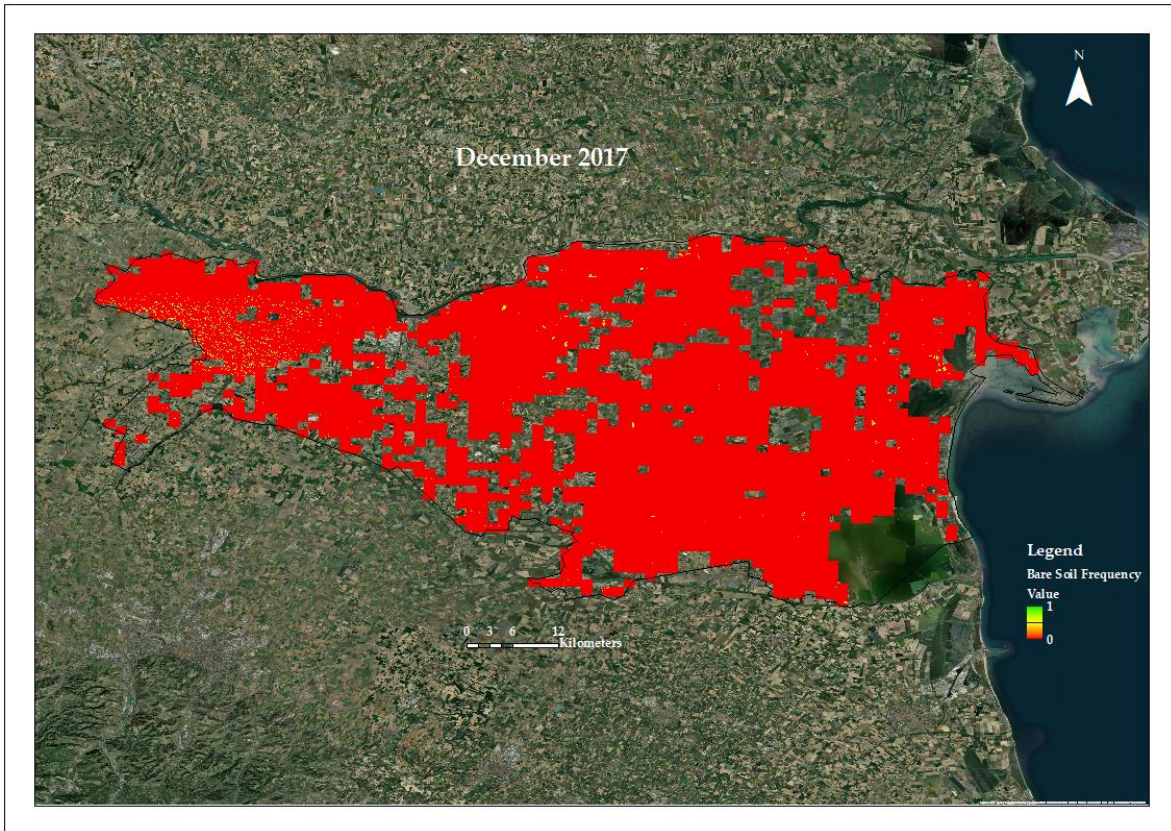

**Figure S2.** Yearly Bare Soil Frequency of the Ferrara region for the agricultural year 2017.

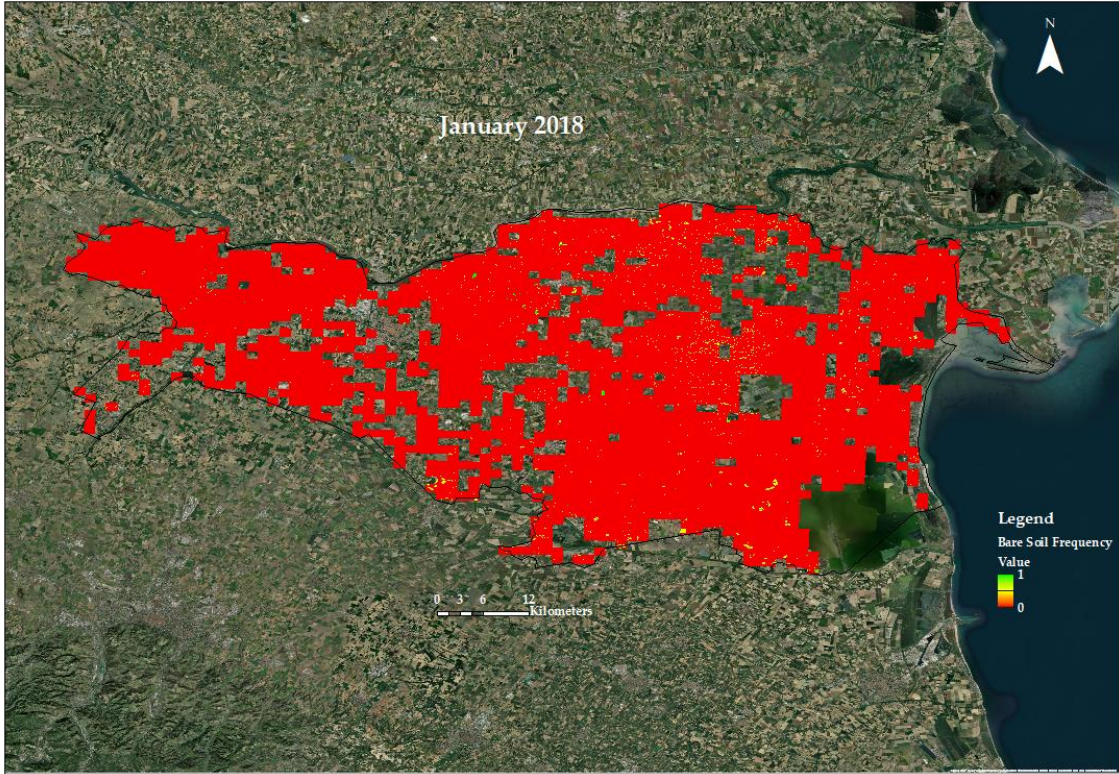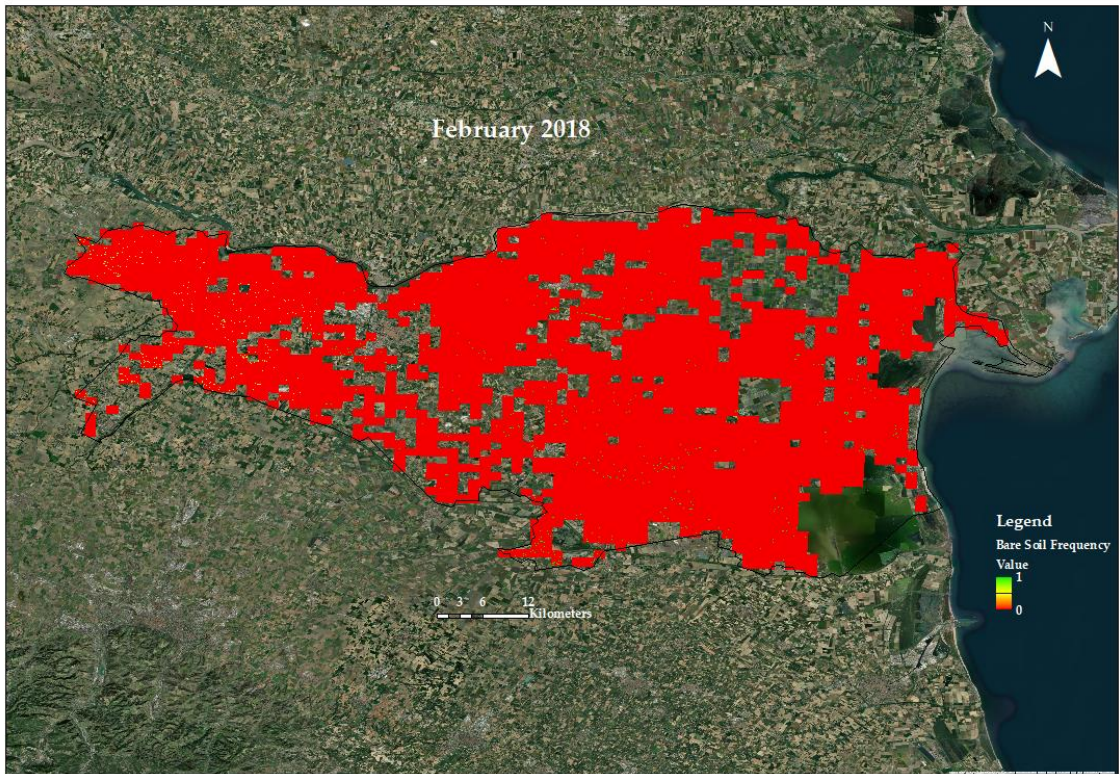

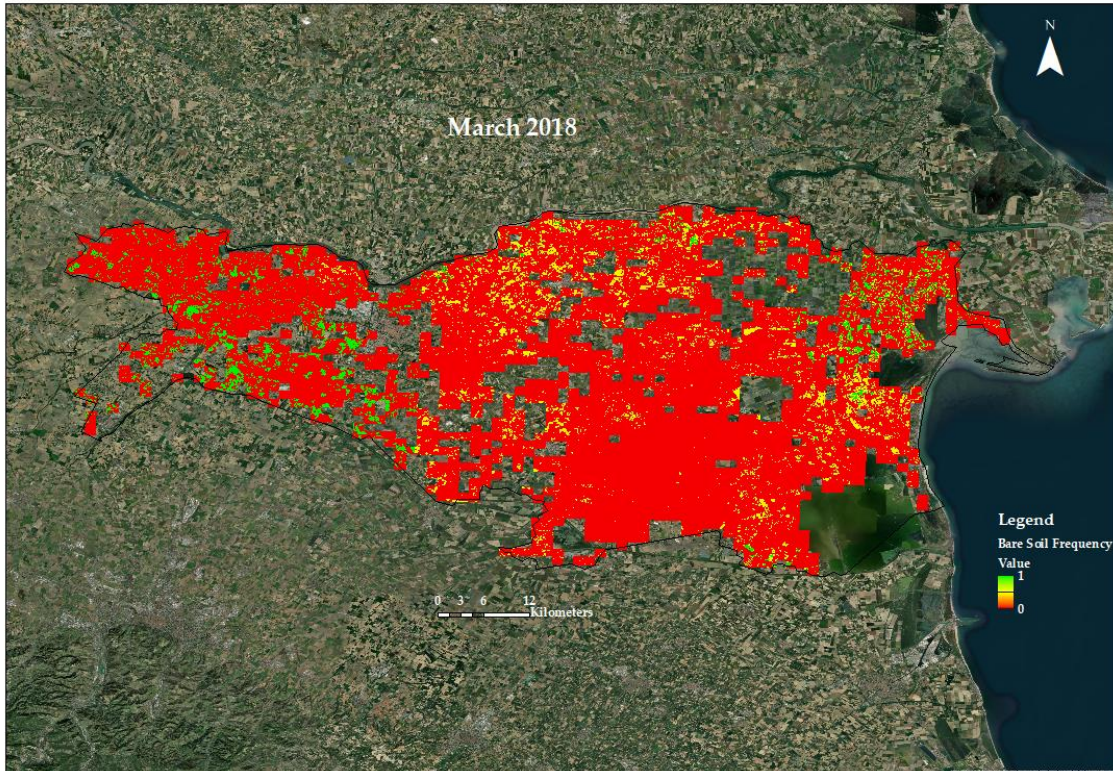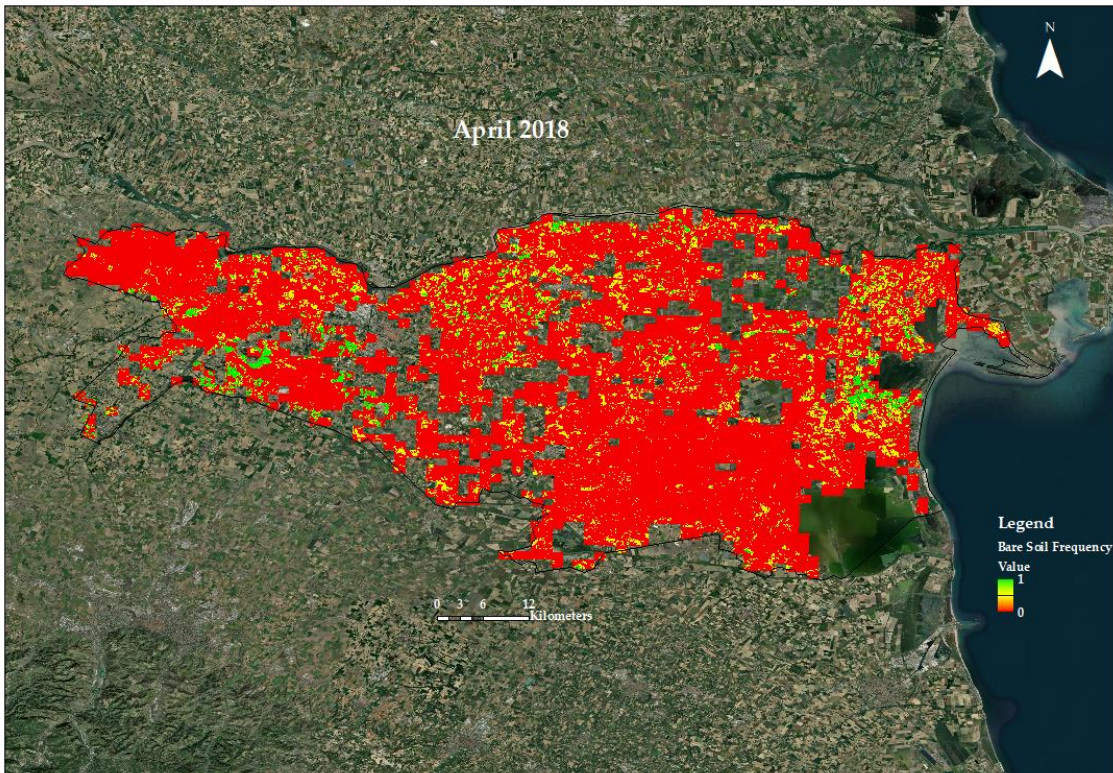

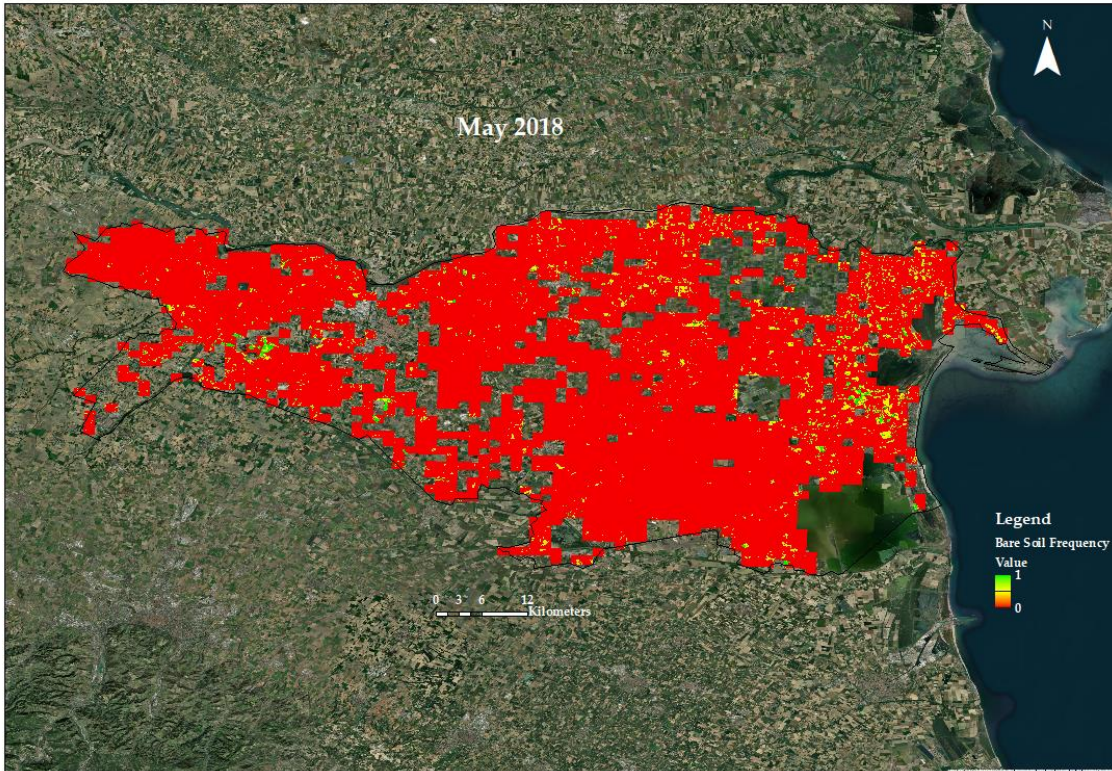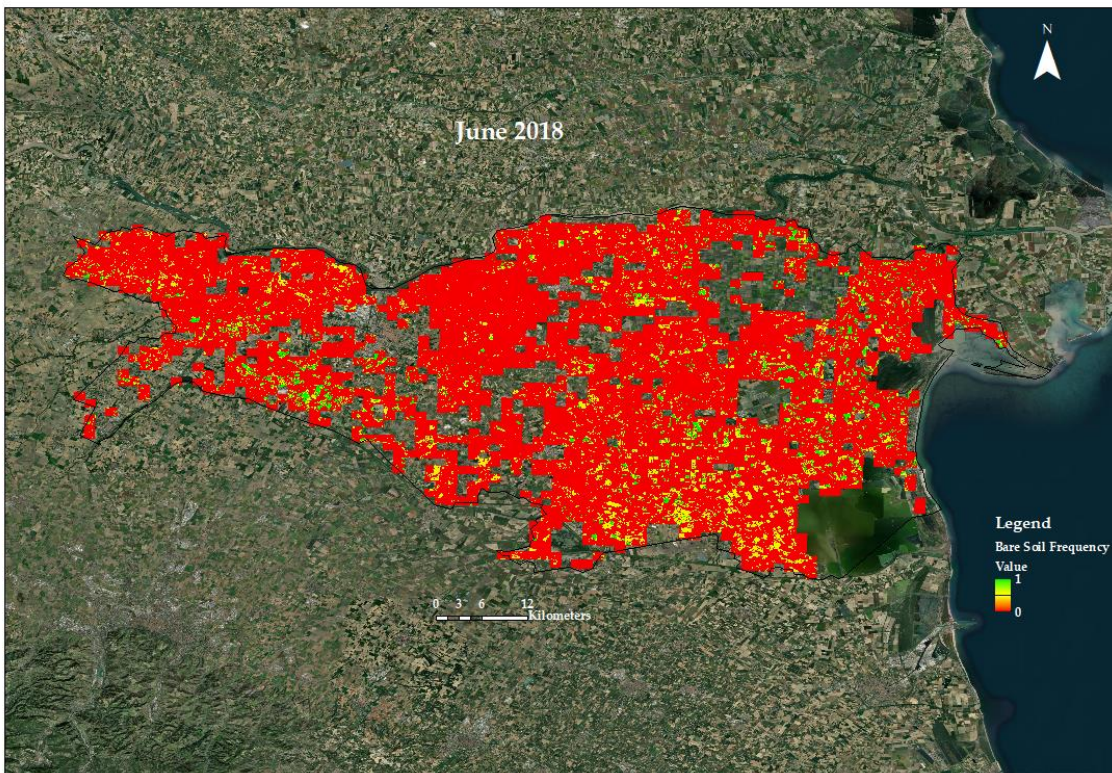



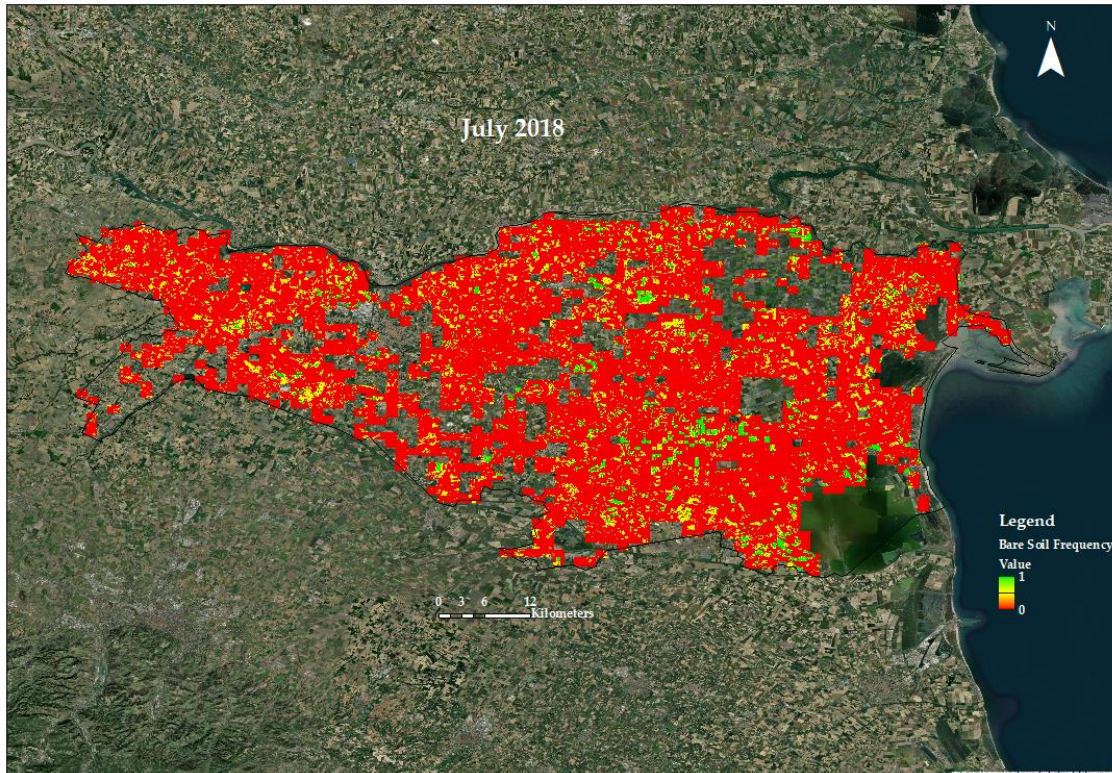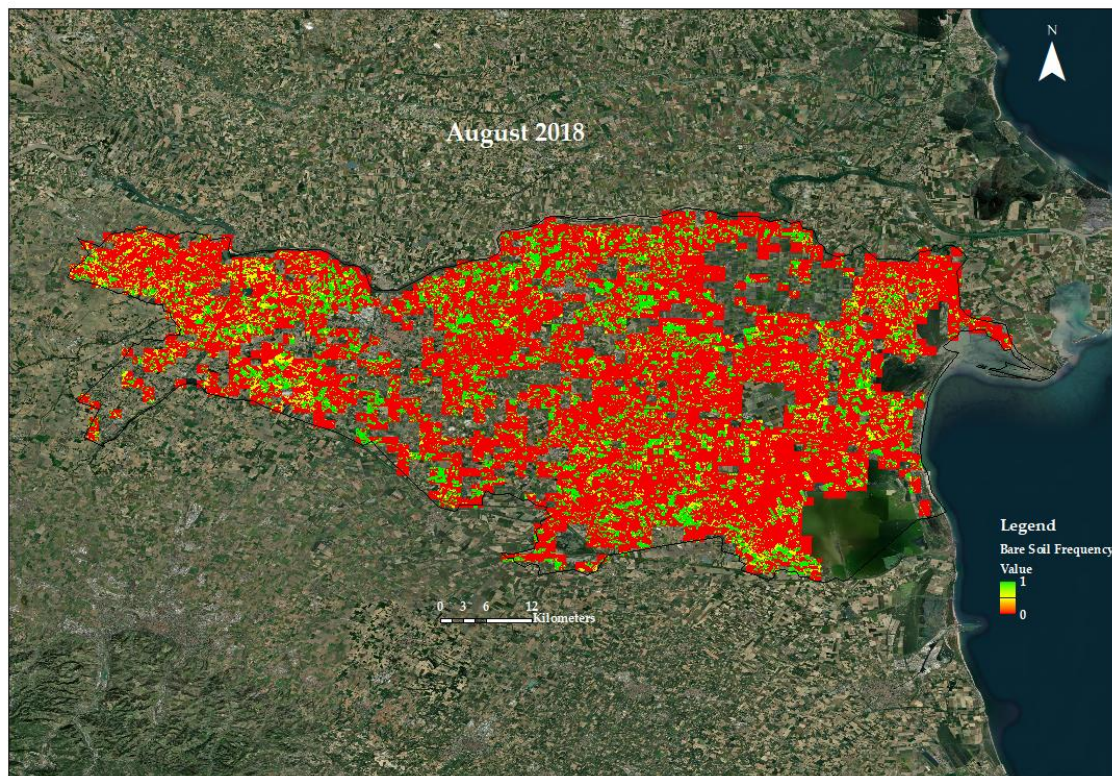

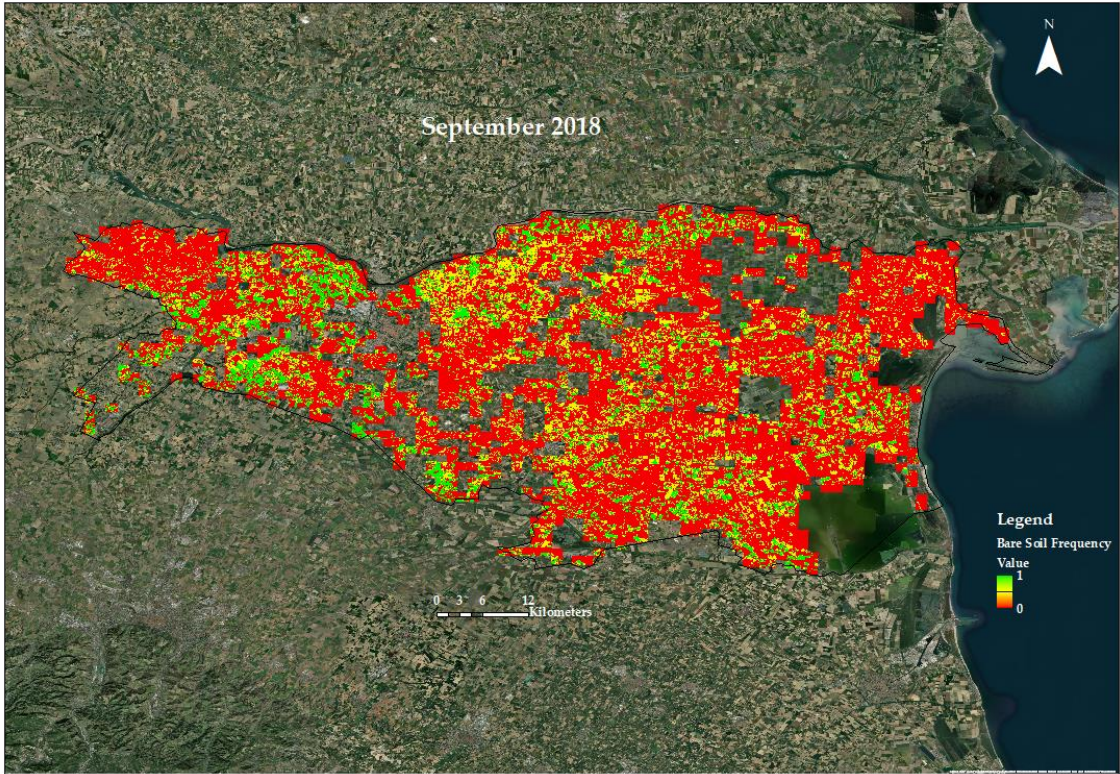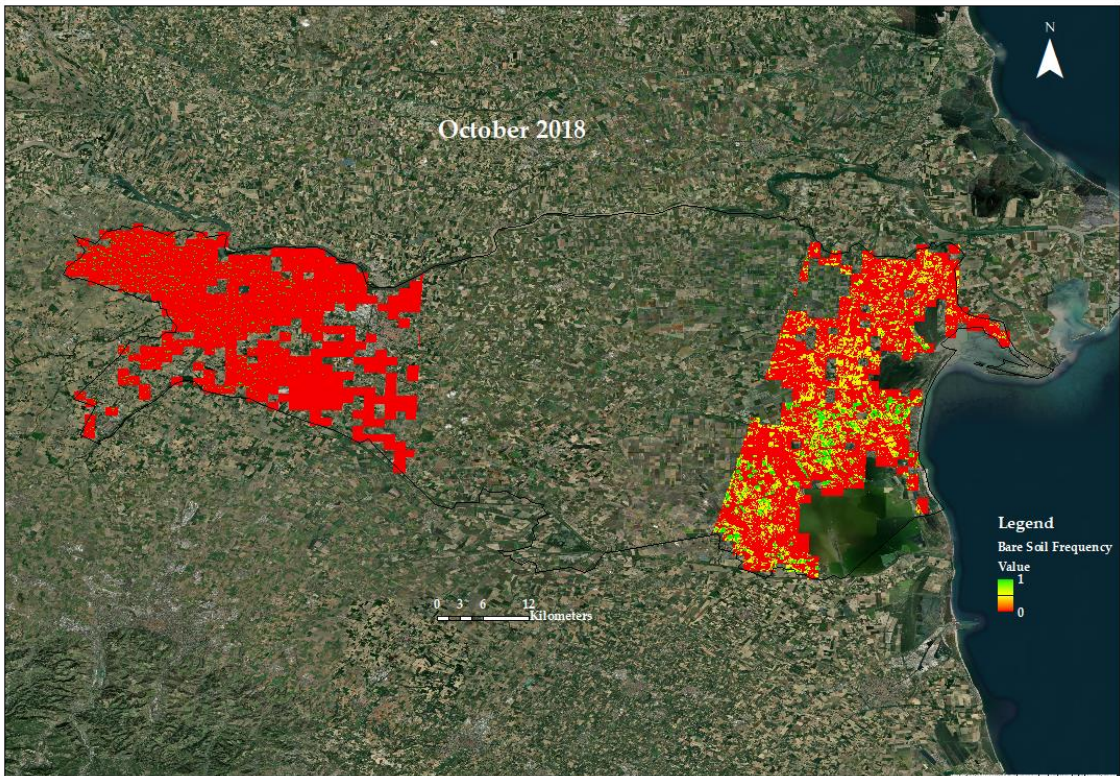

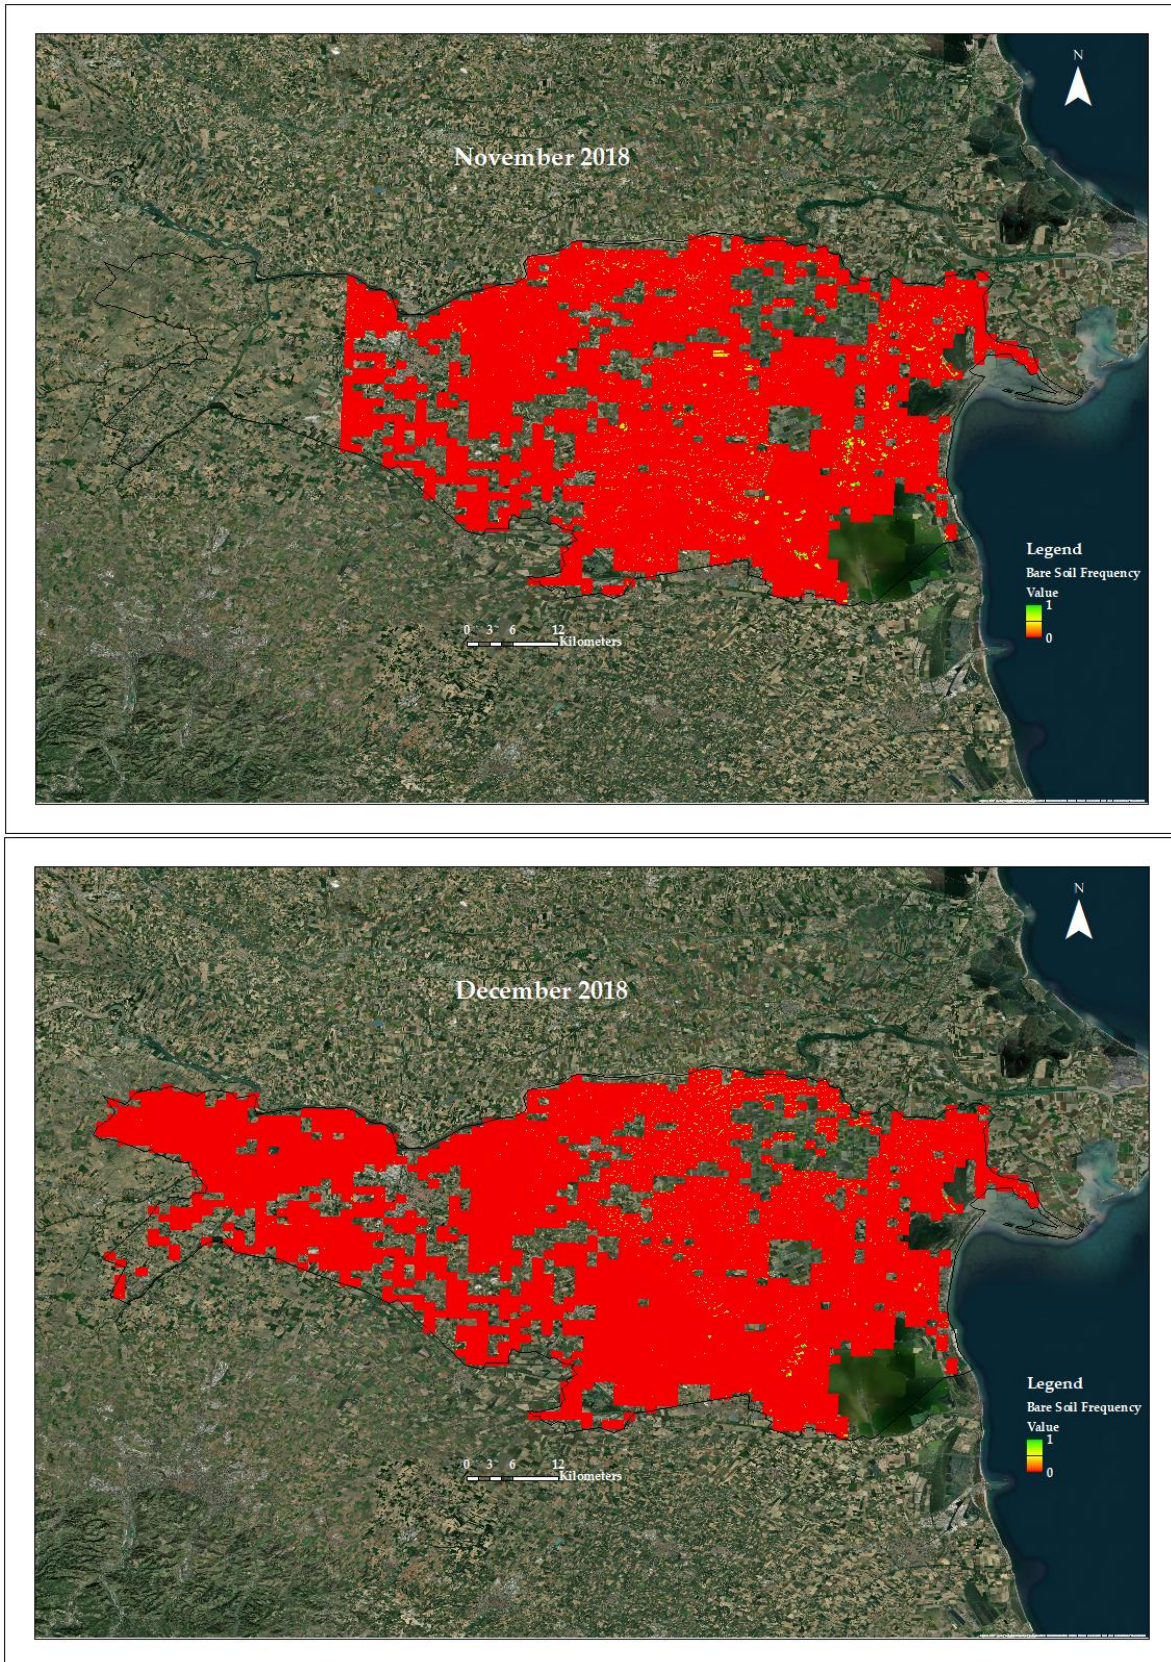

**Figure S3.** Yearly Bare Soil Frequency of the Ferrara region for the agricultural year 2018.

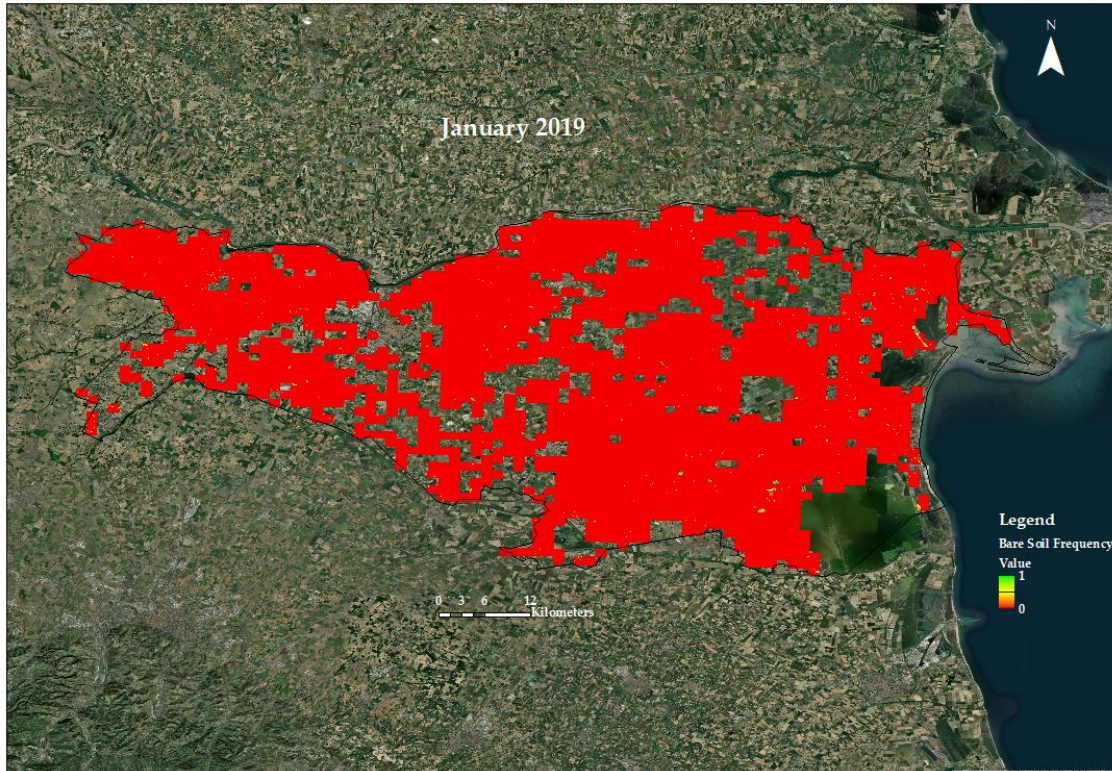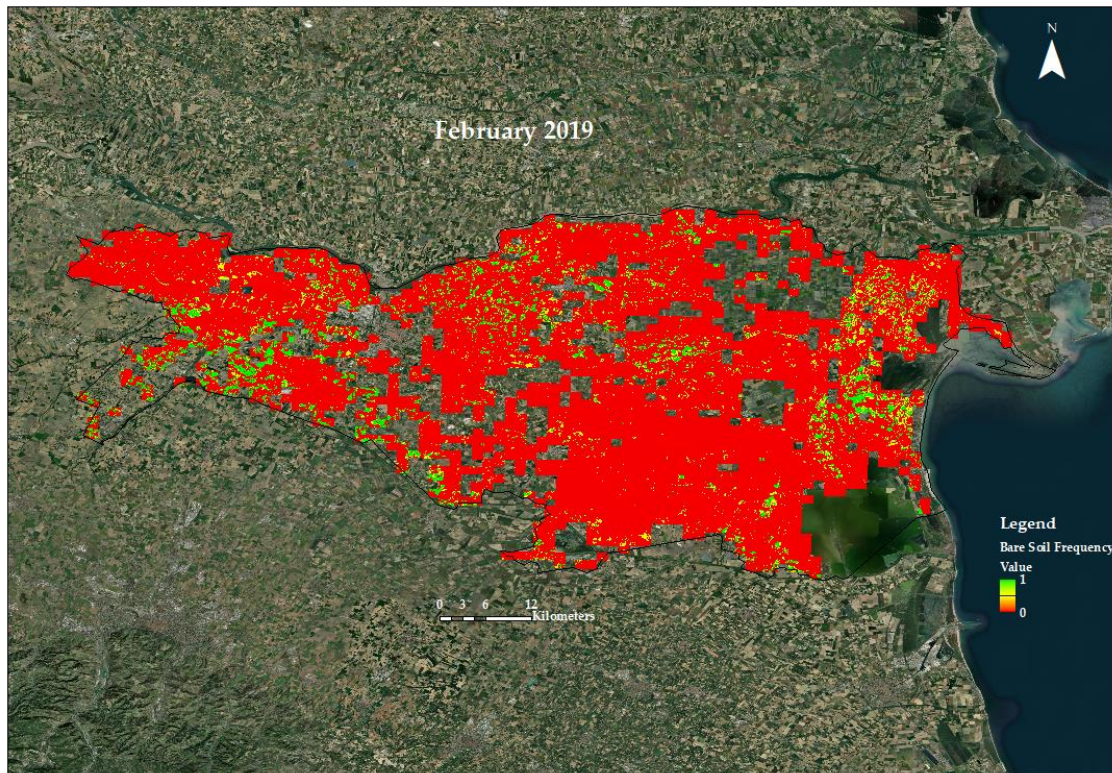

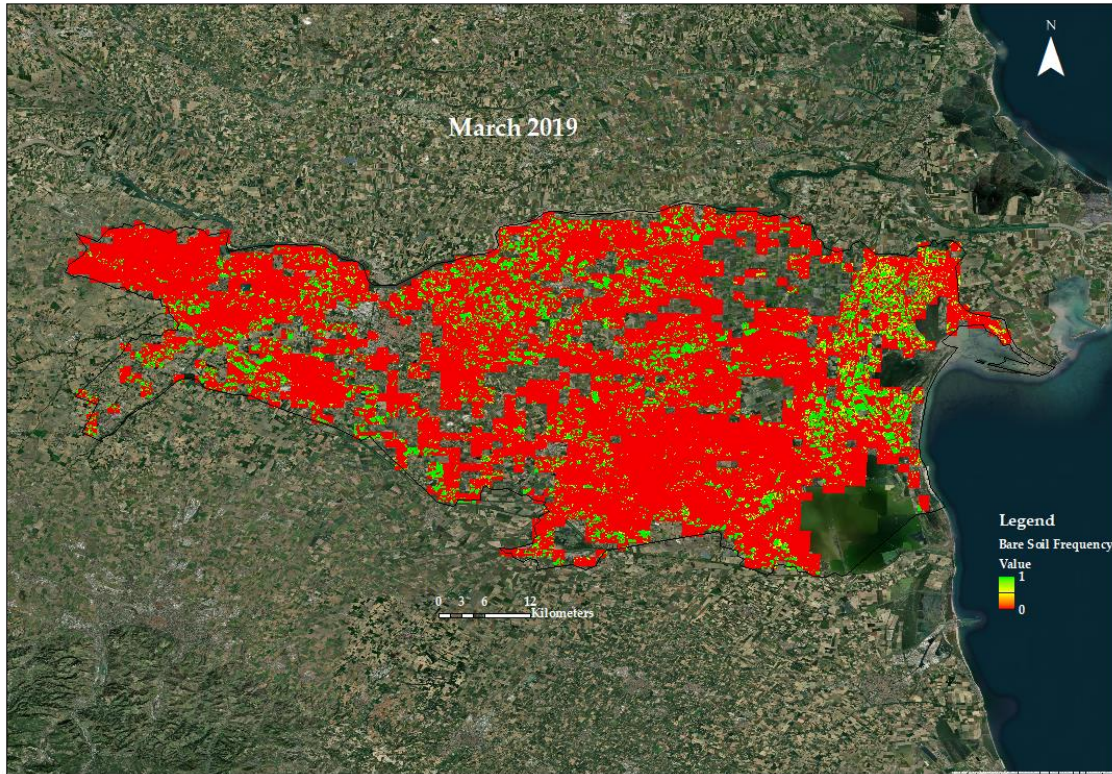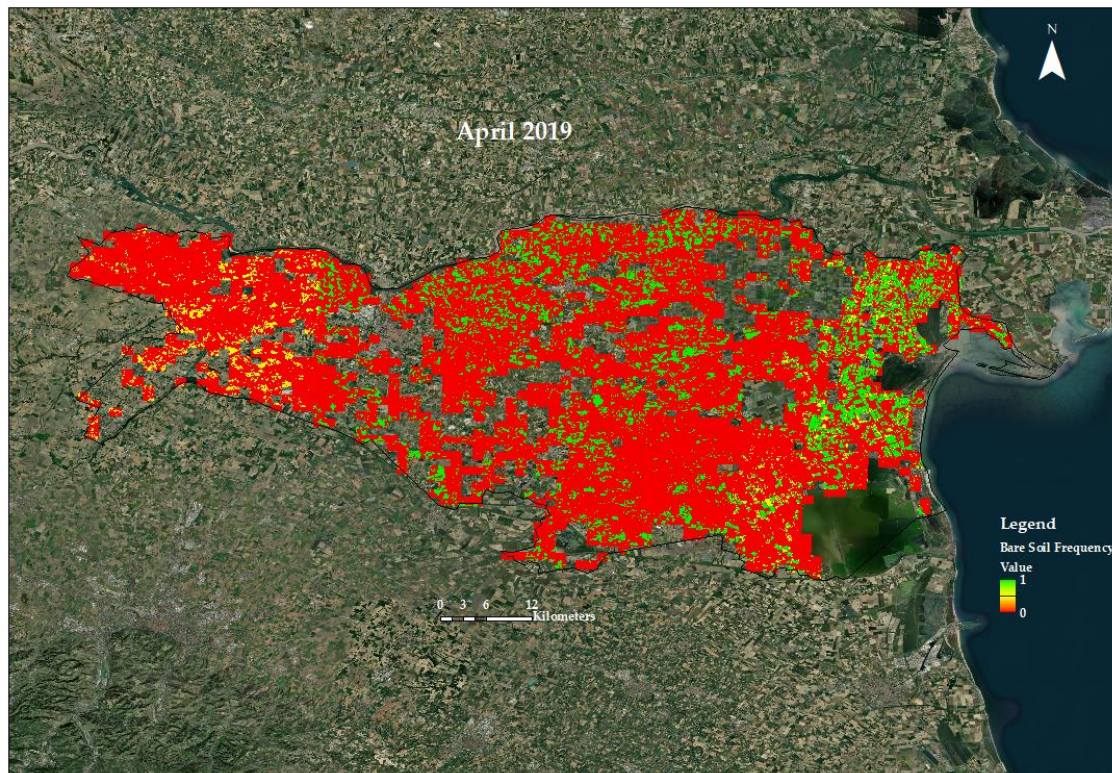

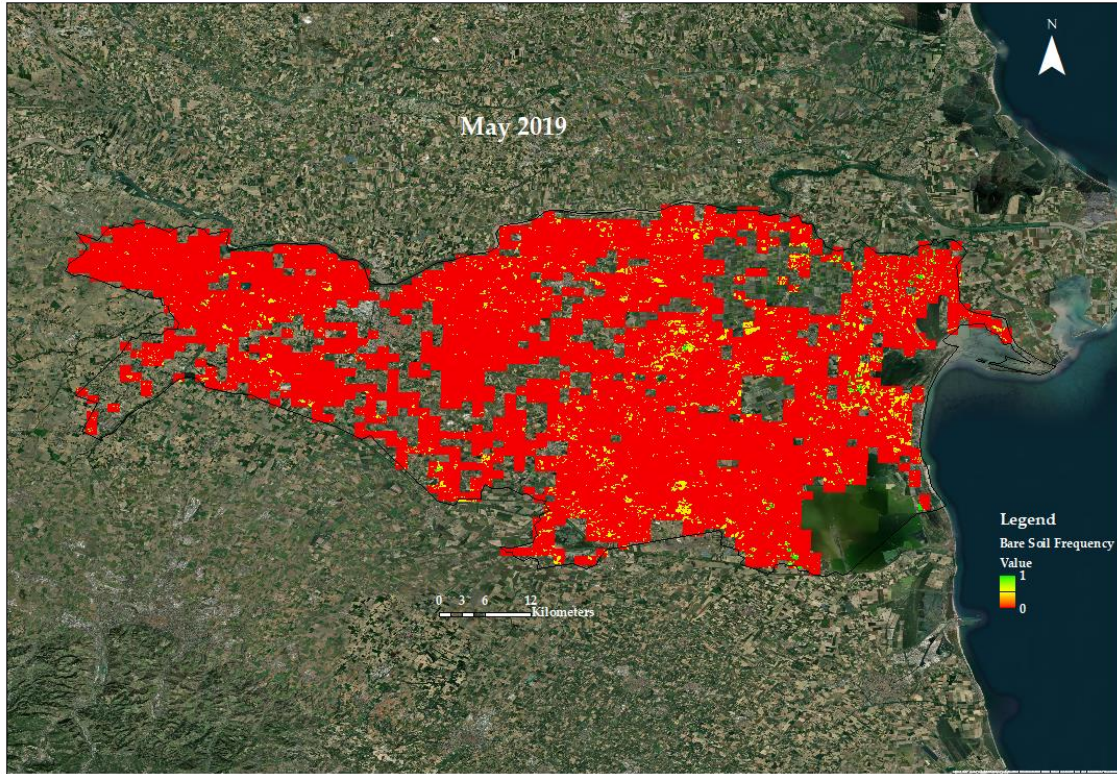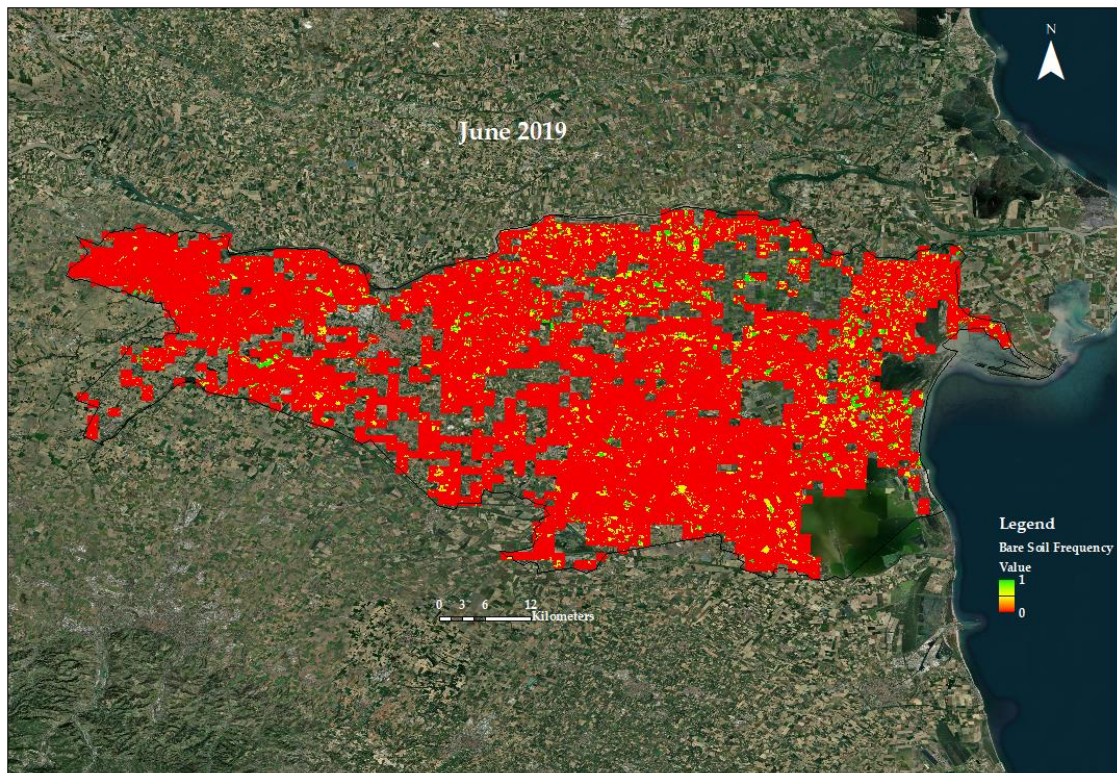

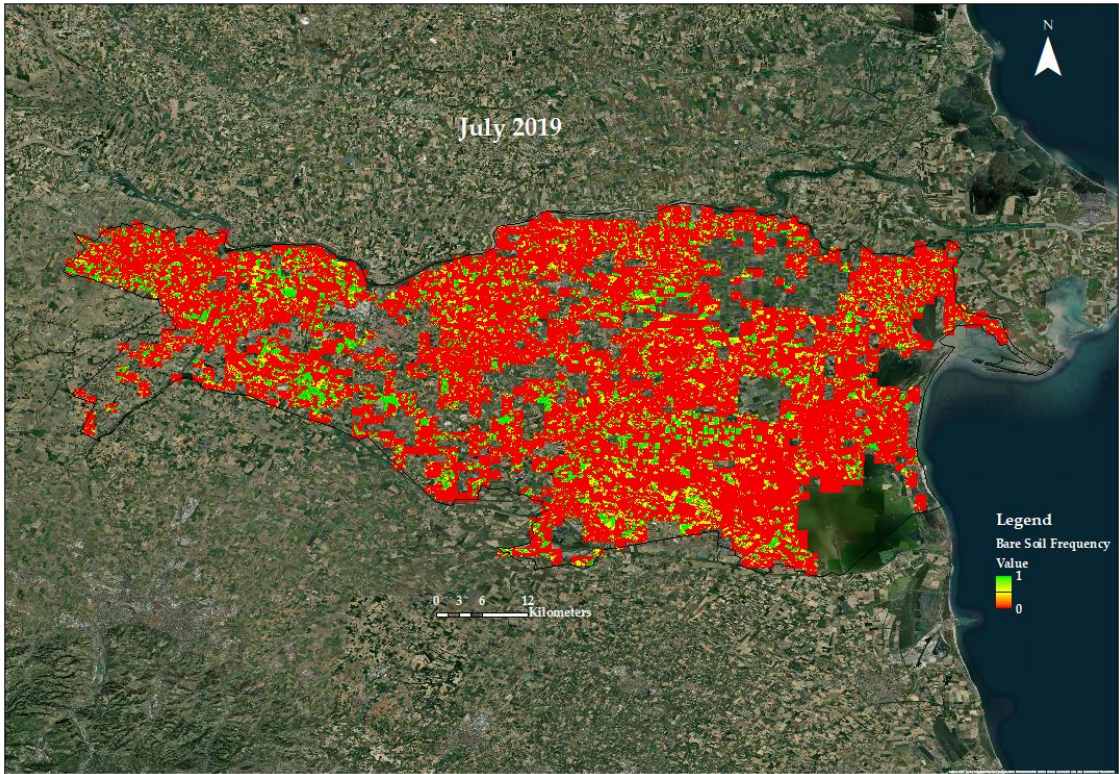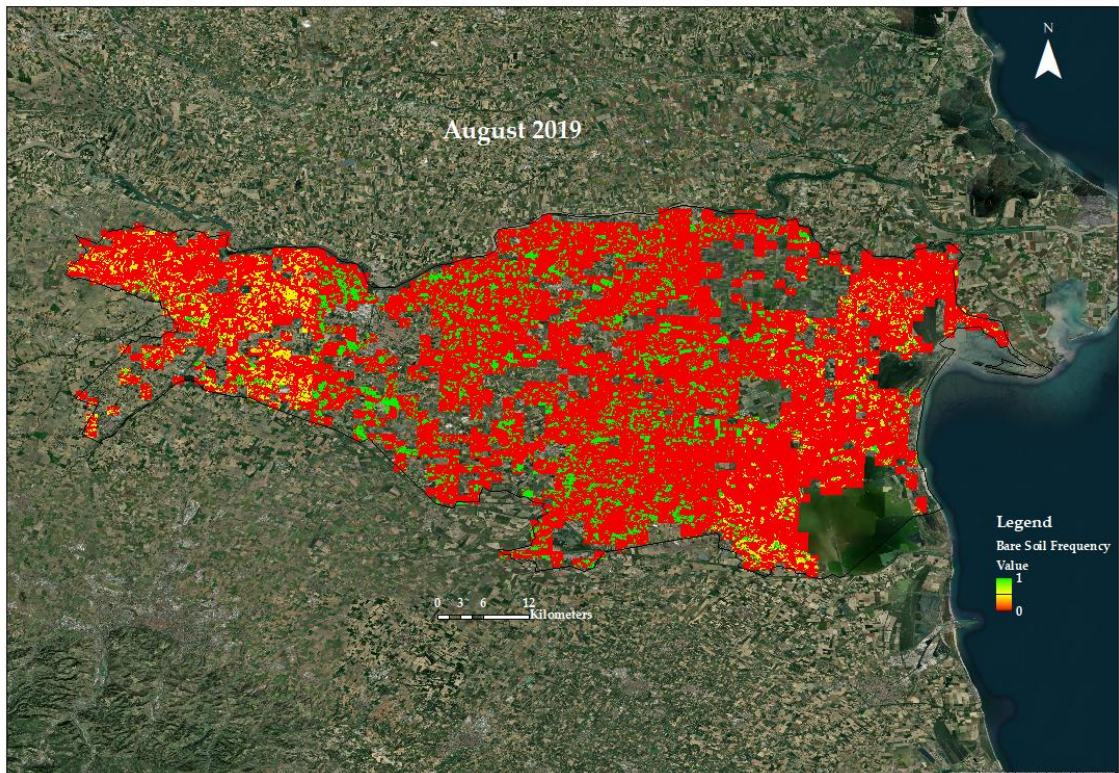

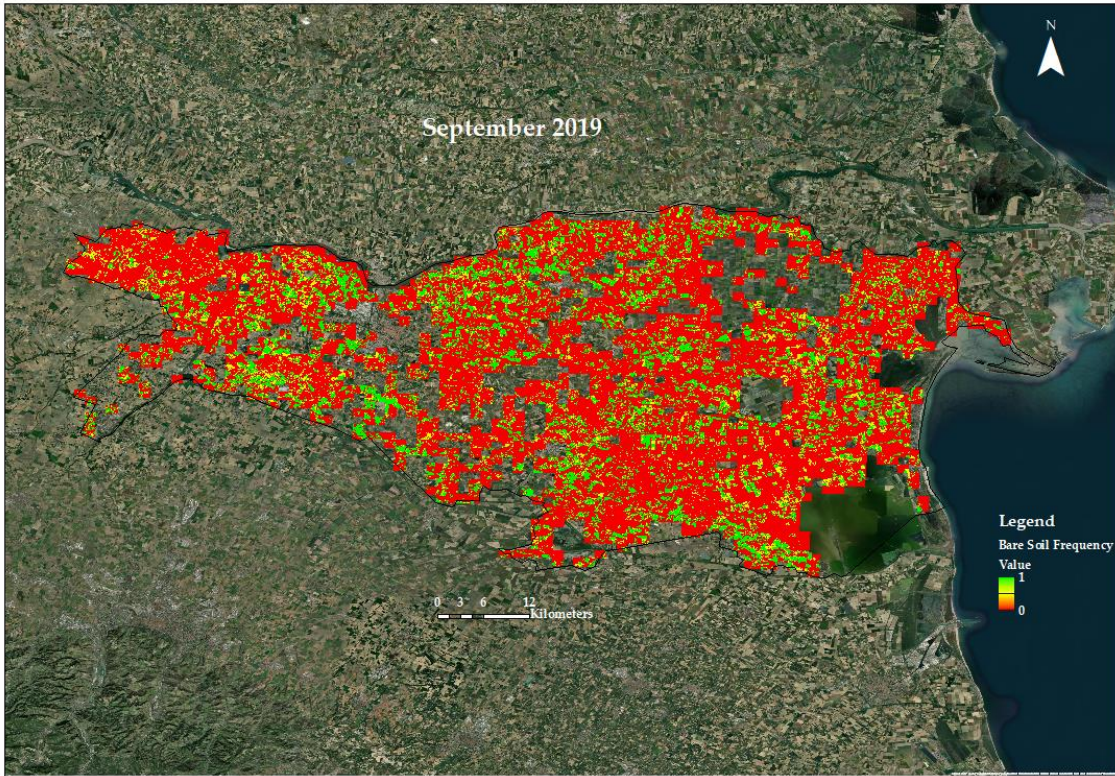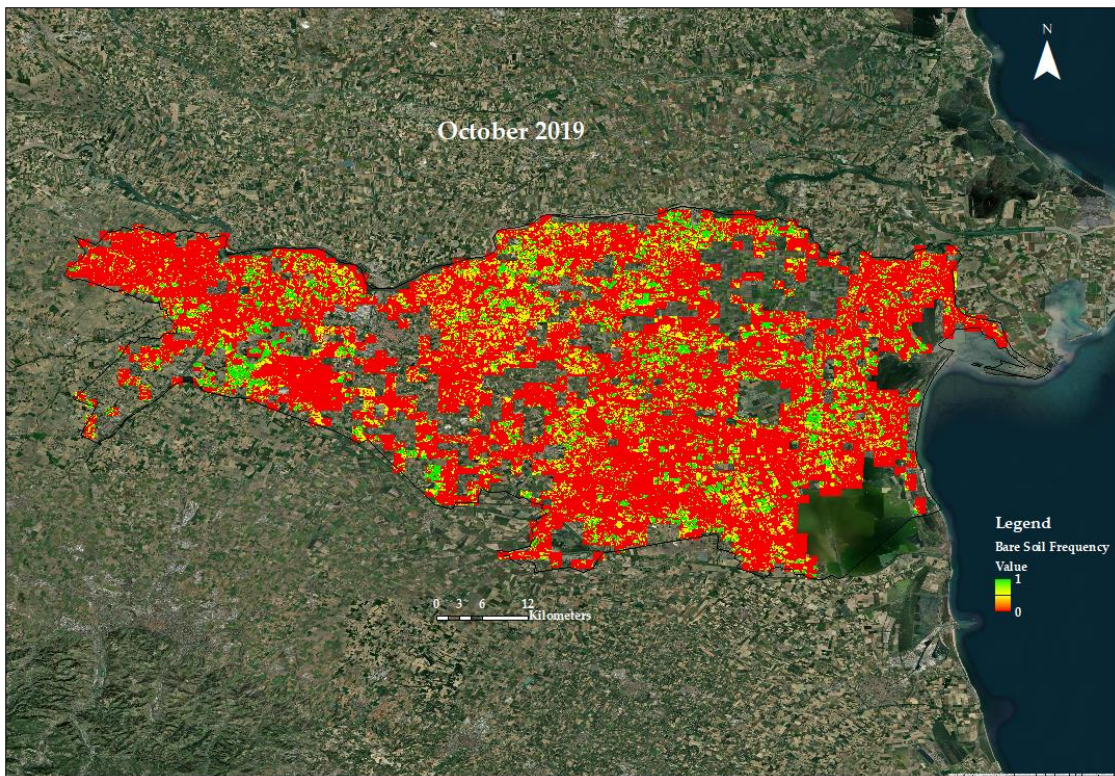



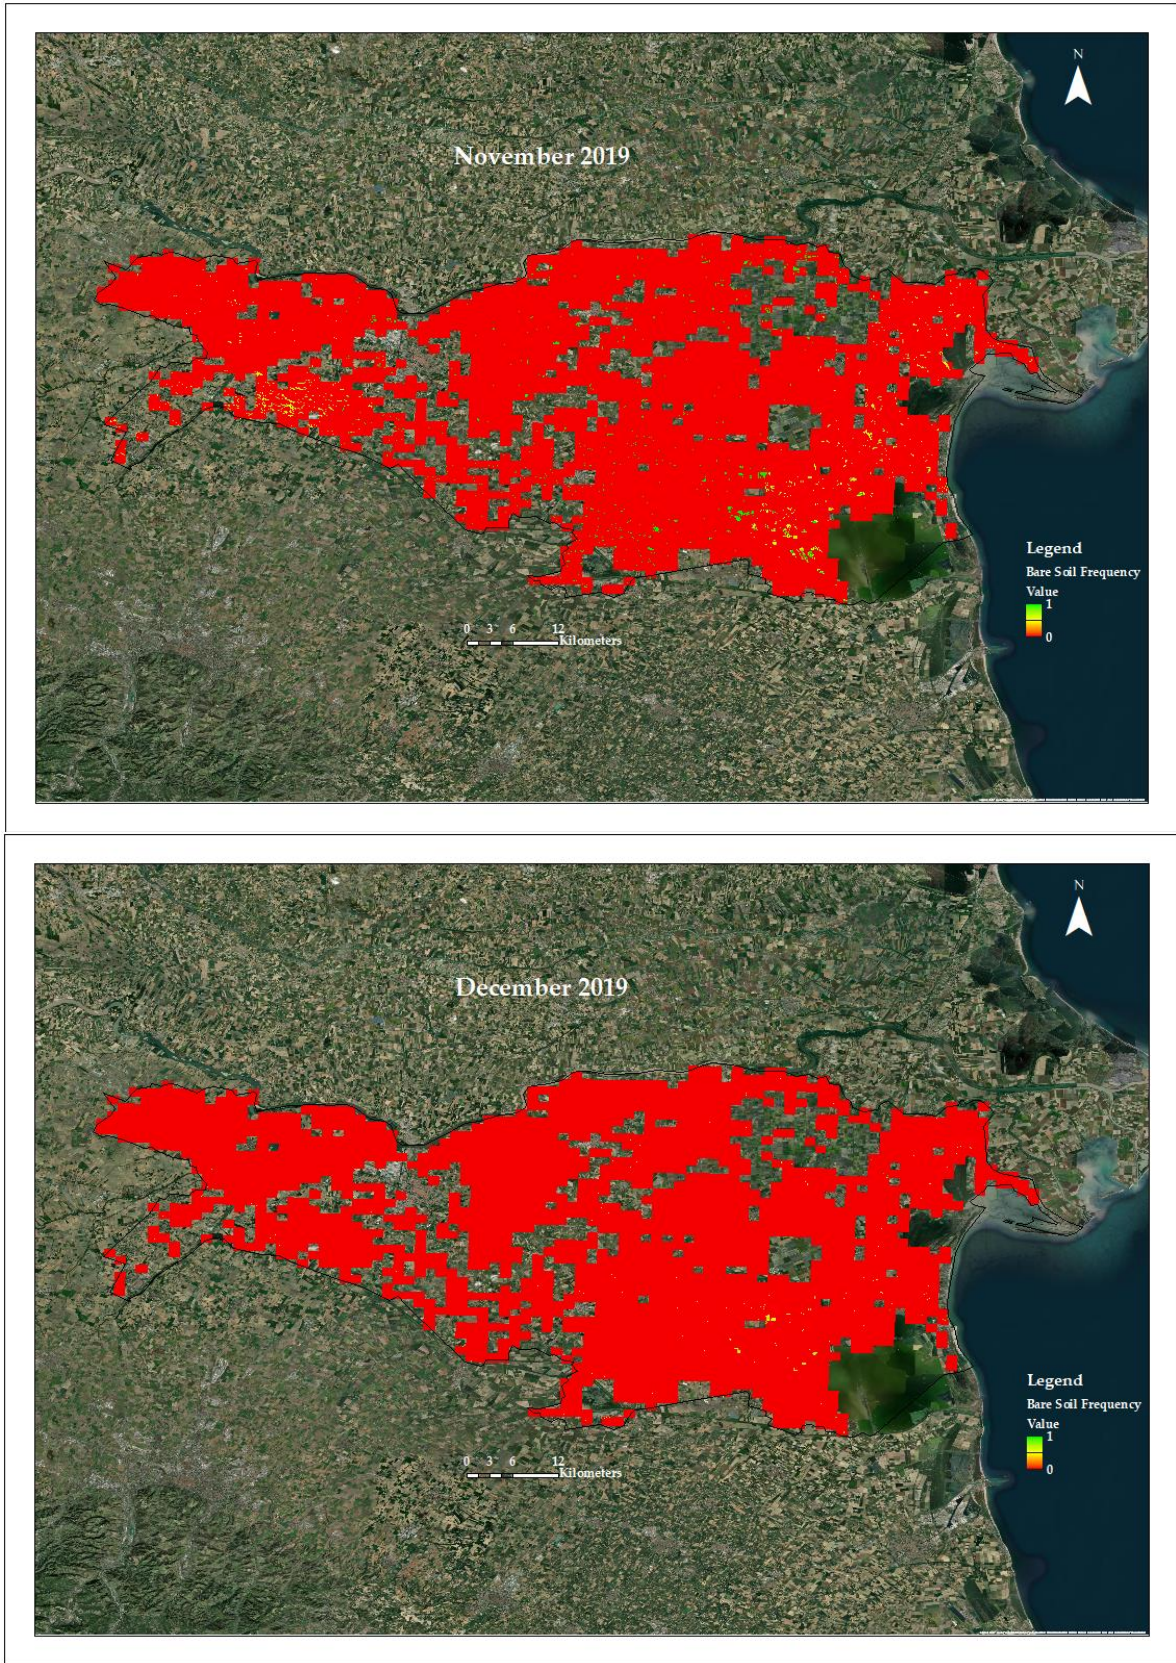

Figure S4. Yearly Bare Soil Frequency of the Ferrara region for the agricultural year 2019.

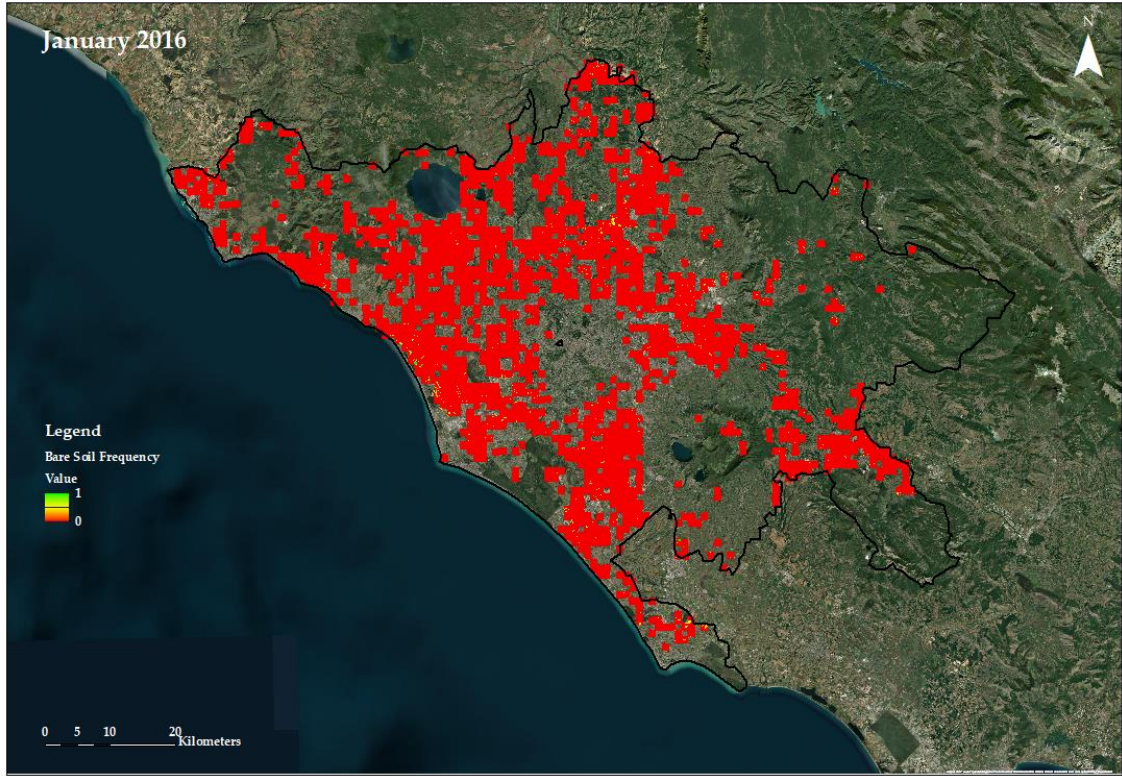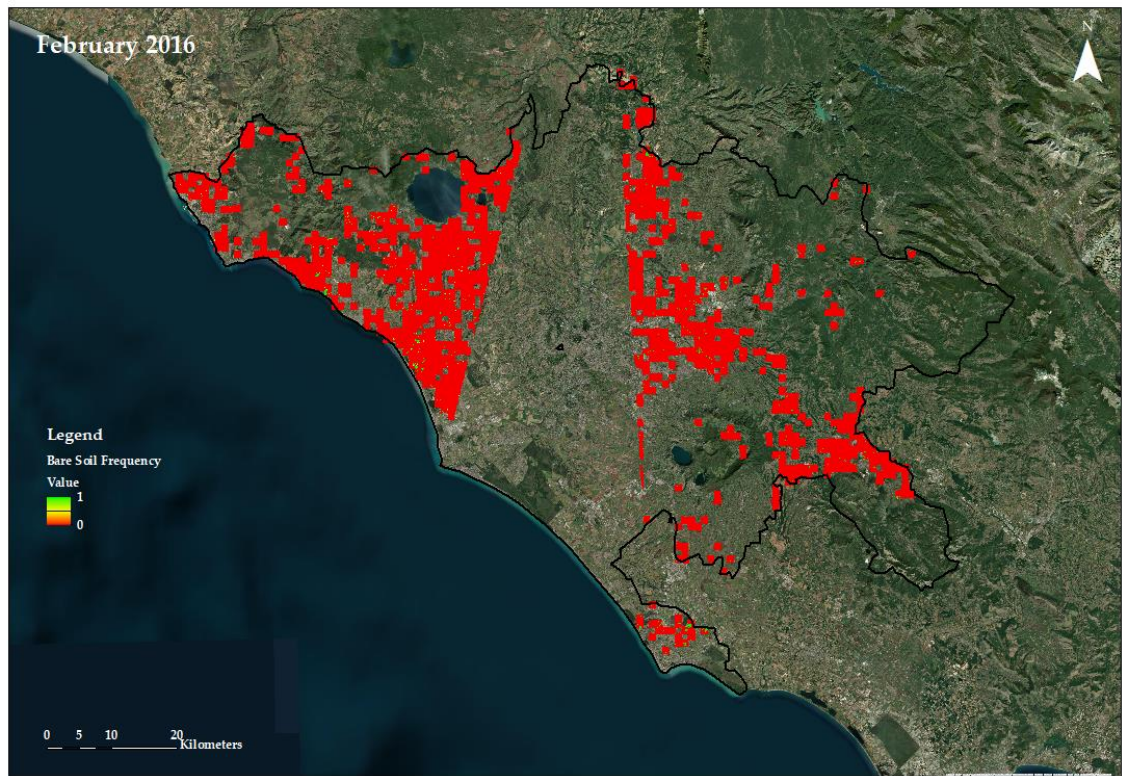

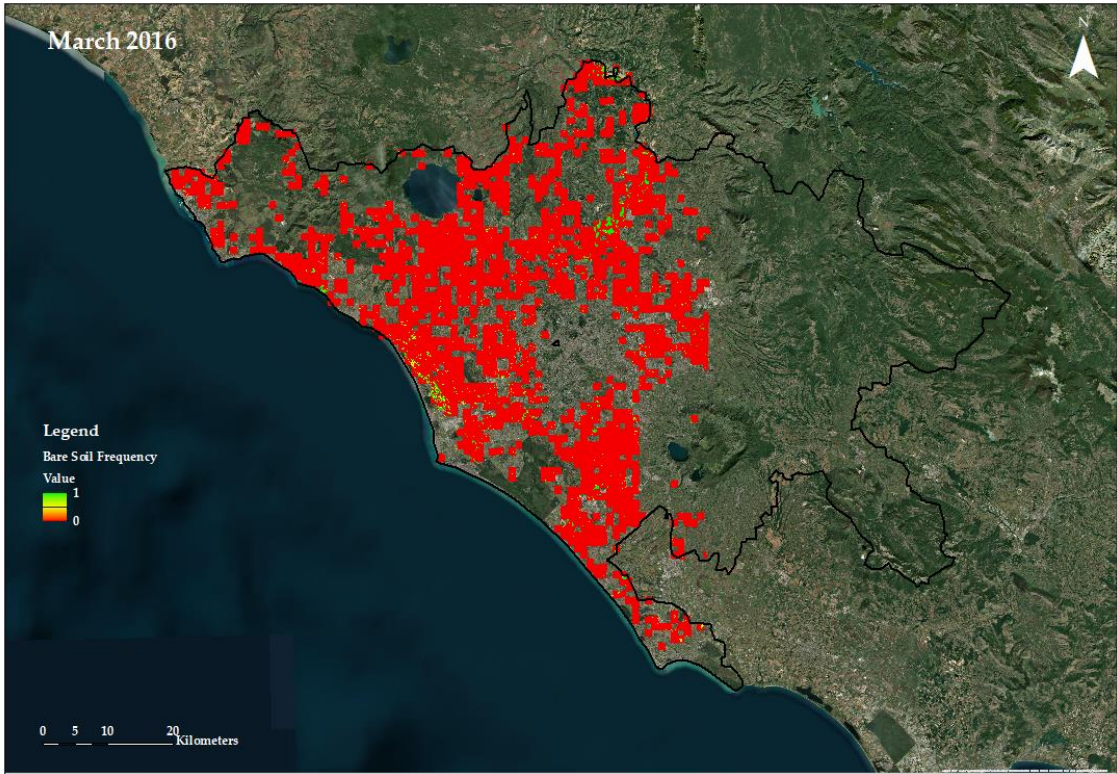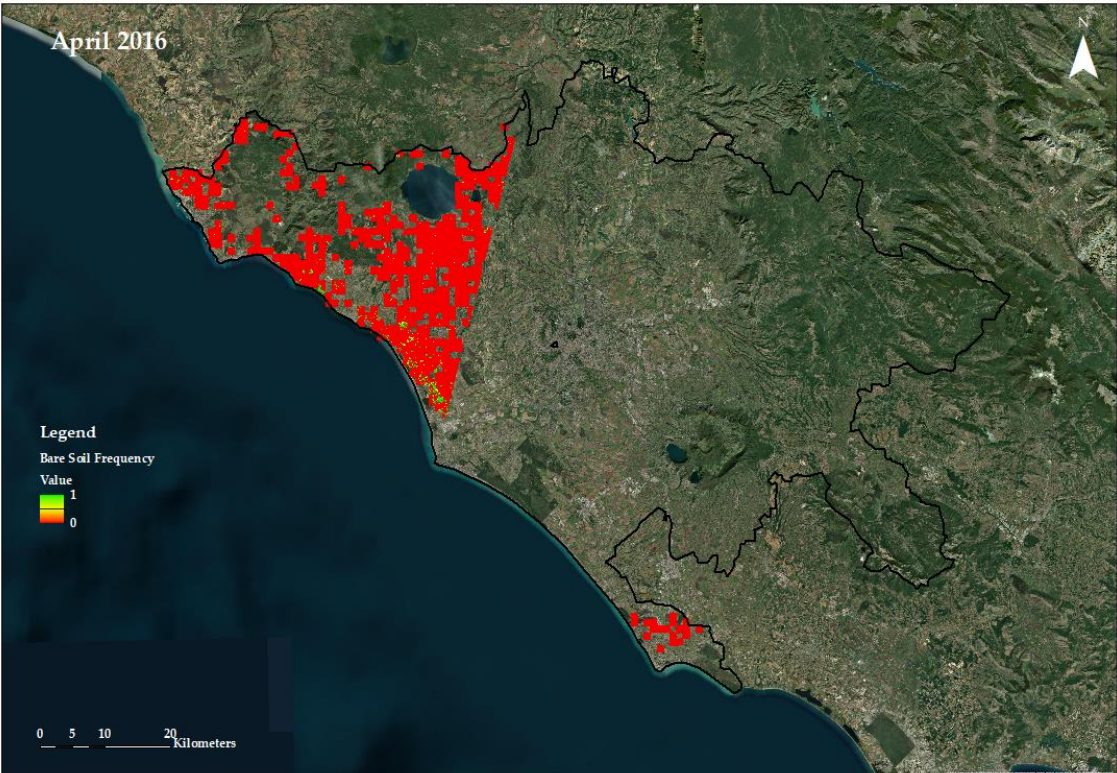

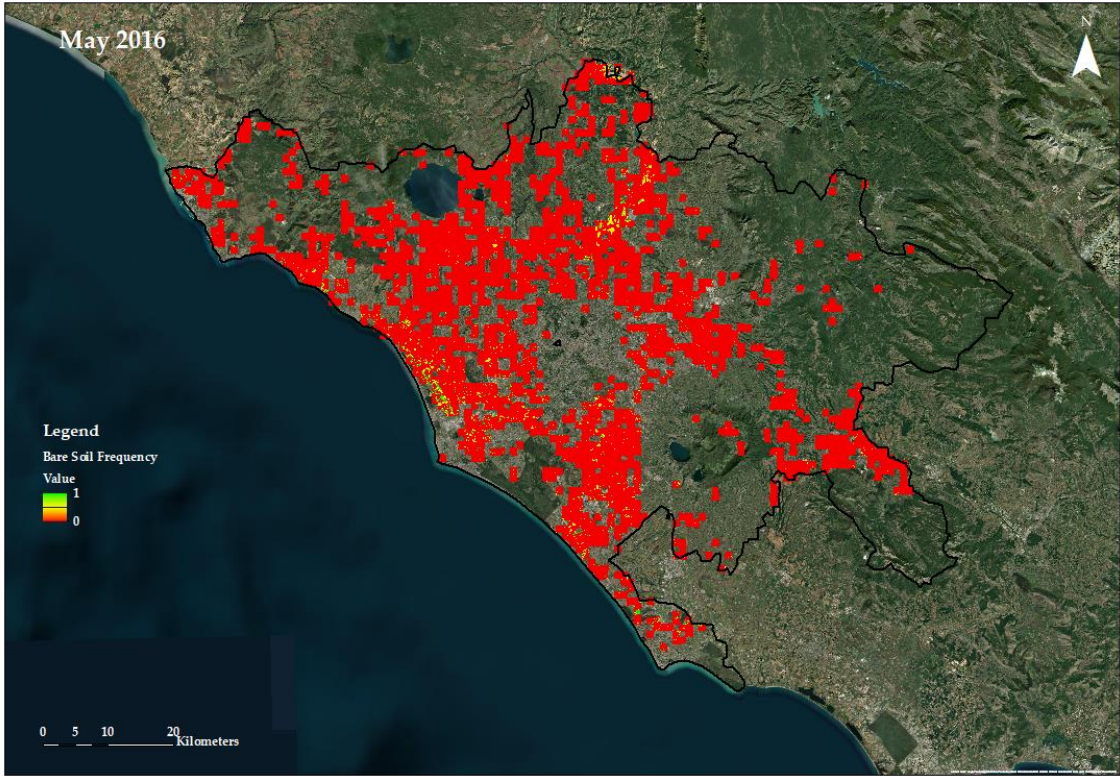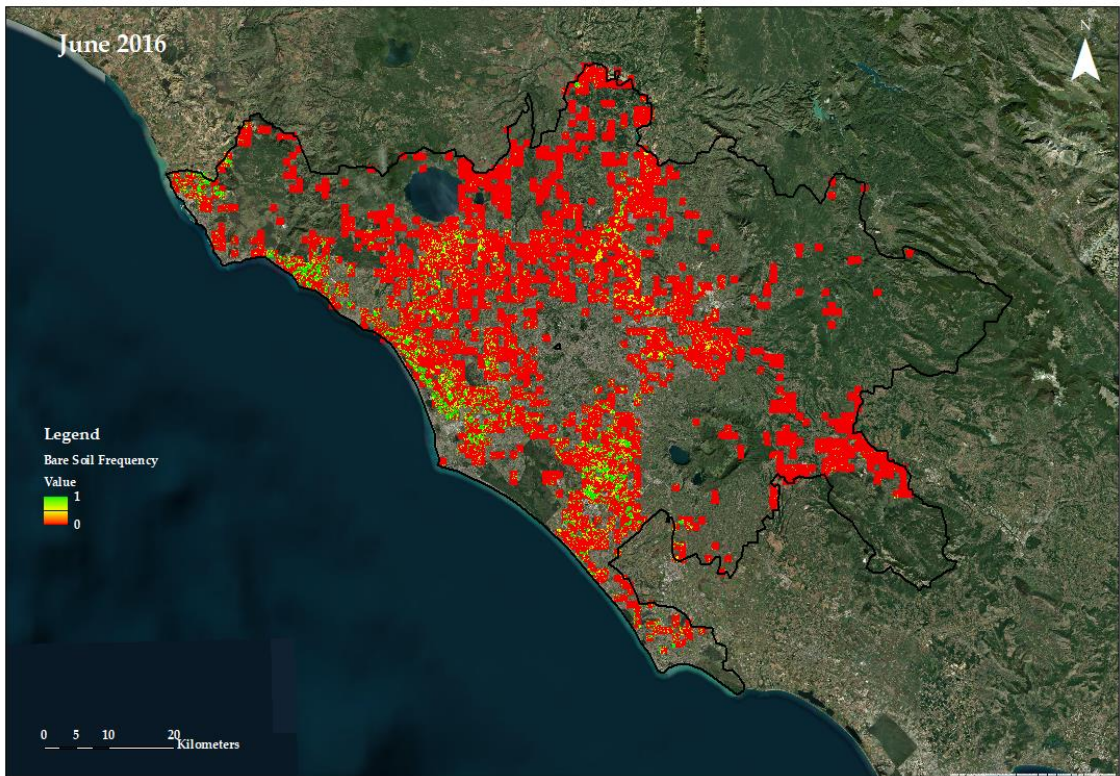

July 2016

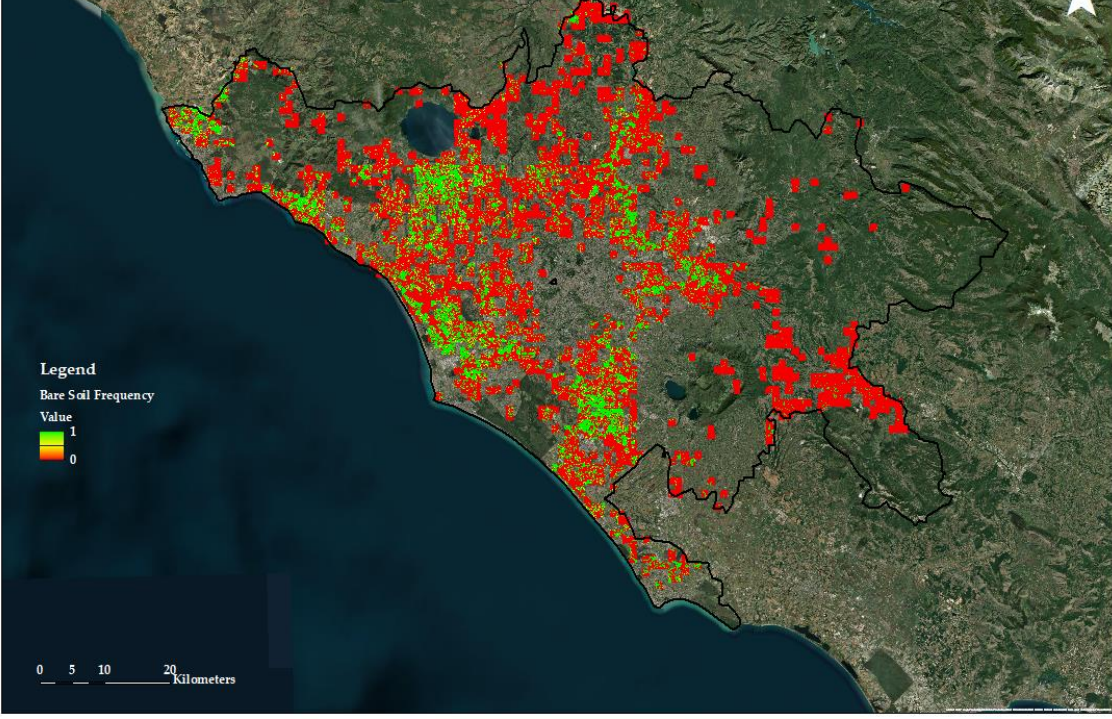

August 2016

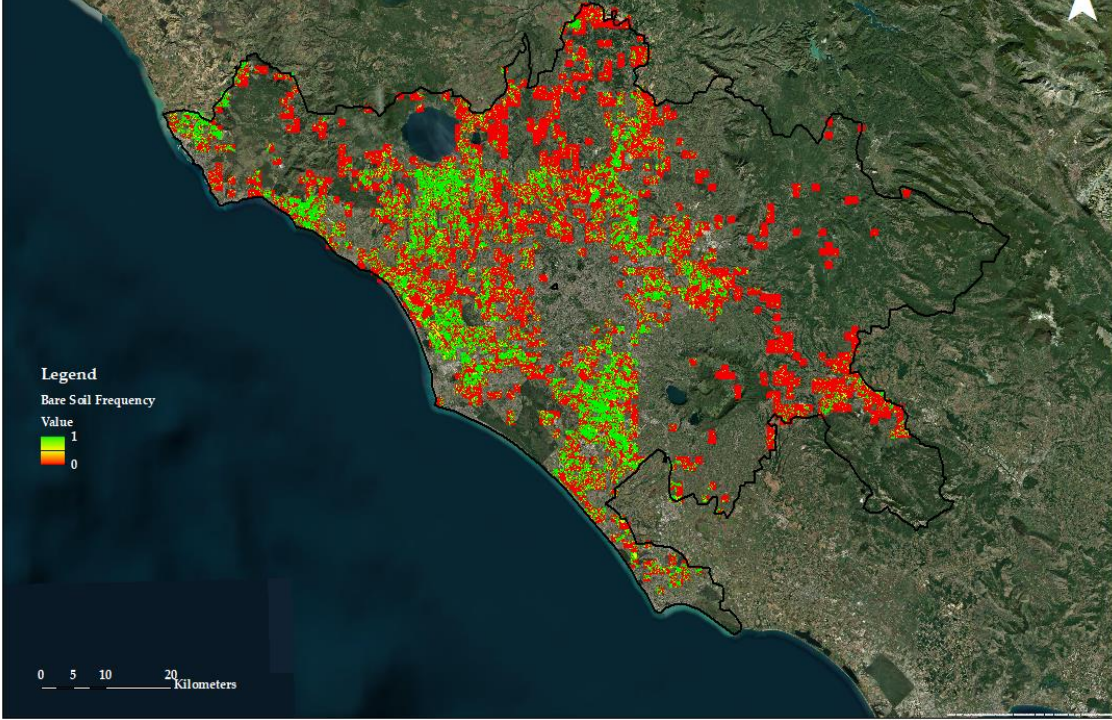

September 2016

Legend

Bare Soil Frequency

Value

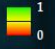

0 5 10 20 Kilometers

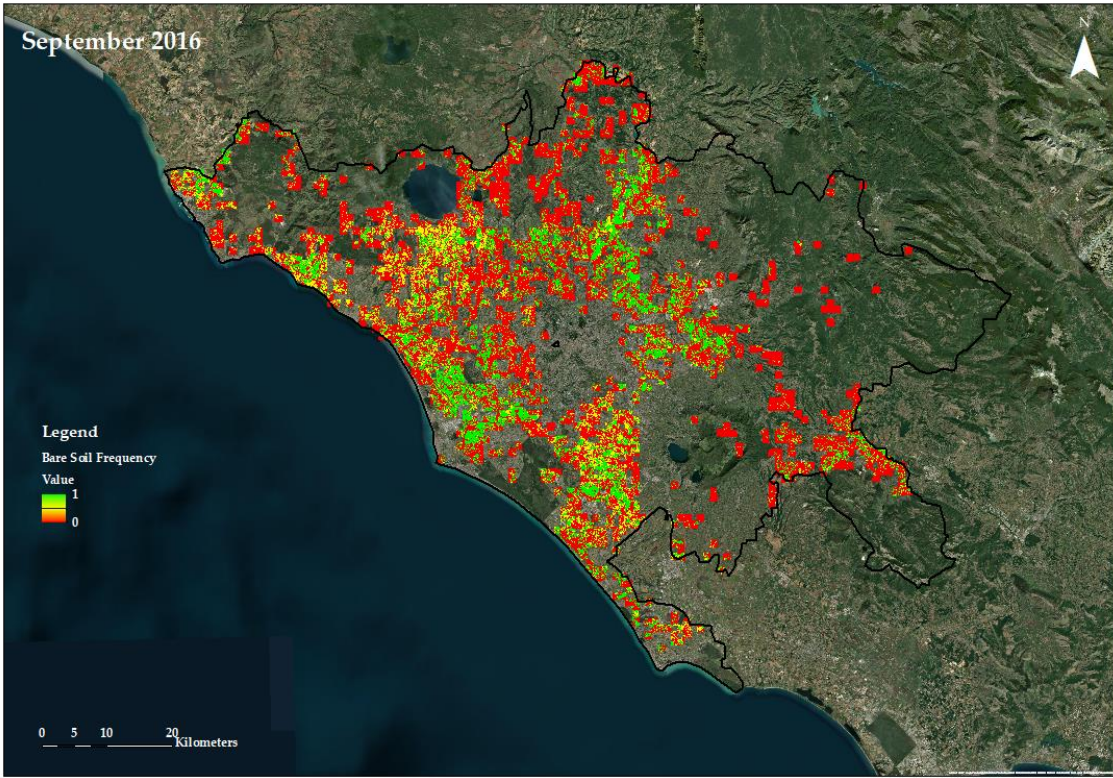

October 2016

Legend

Bare Soil Frequency

Value

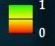

0 5 10 20 Kilometers

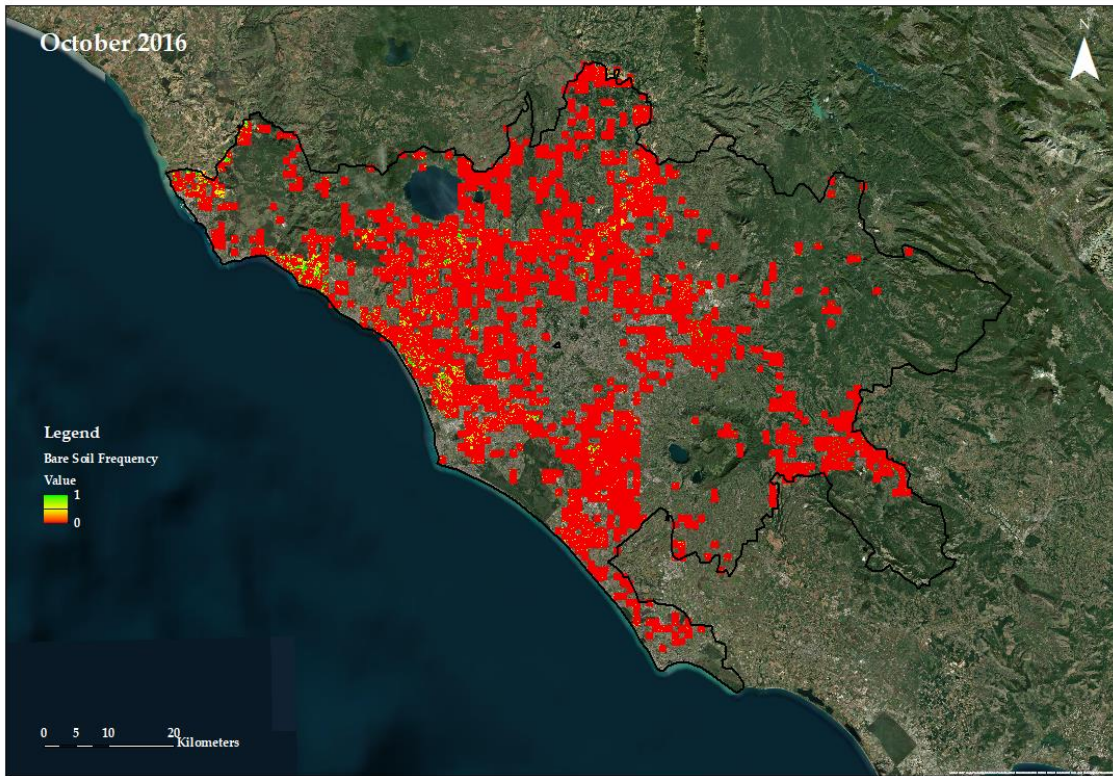

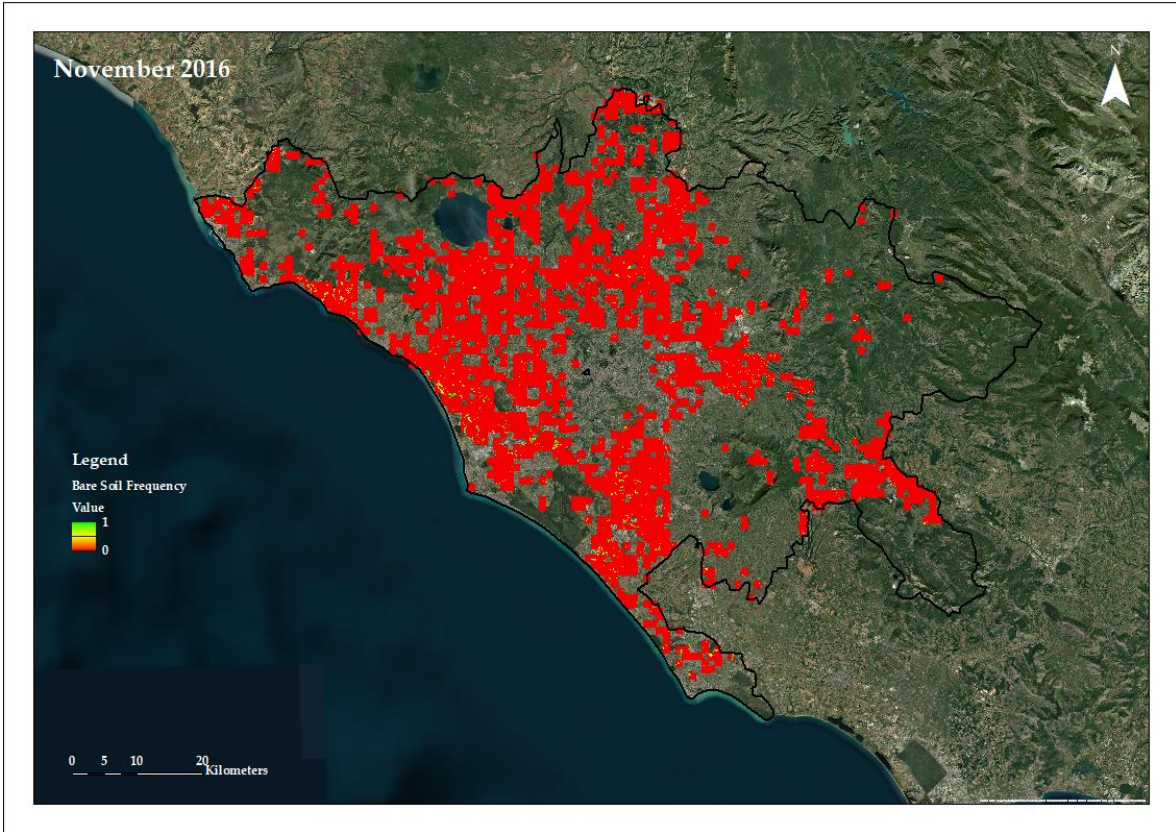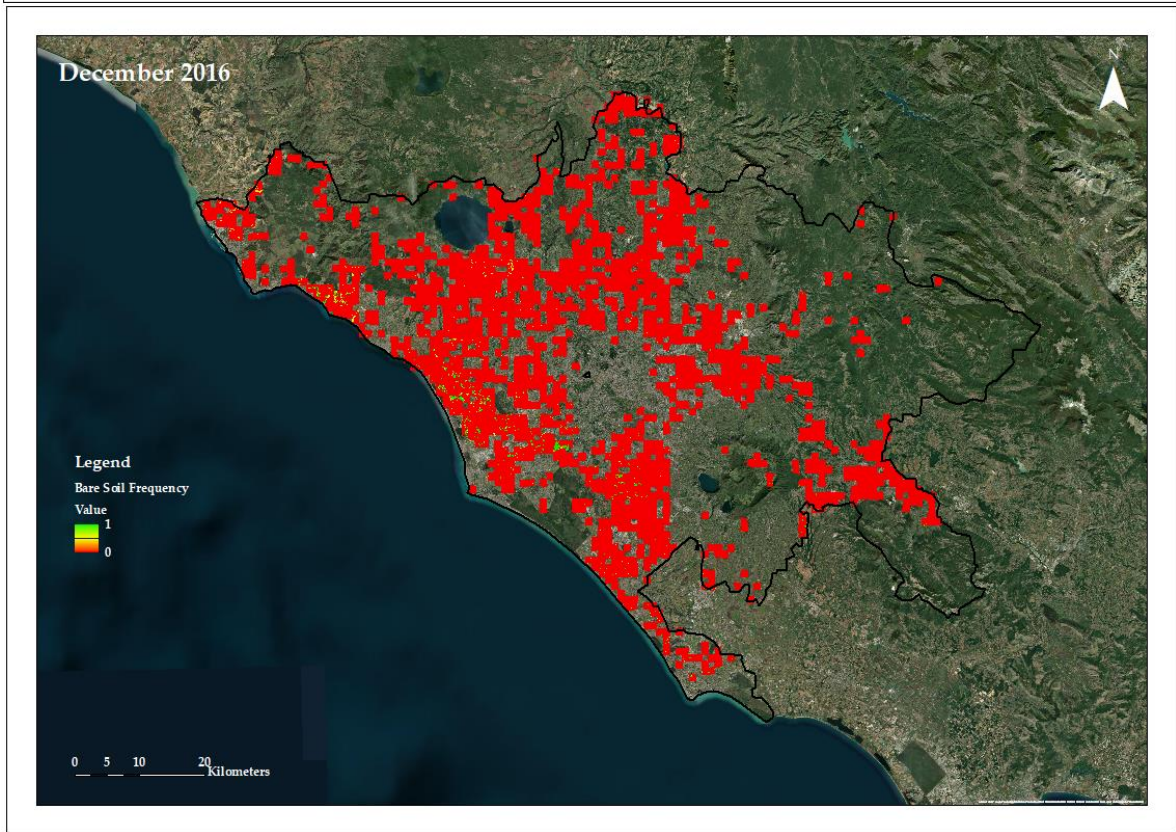

Figure S5. Yearly Bare Soil Frequency of the Roma region for the agricultural year 2016.

January 2017

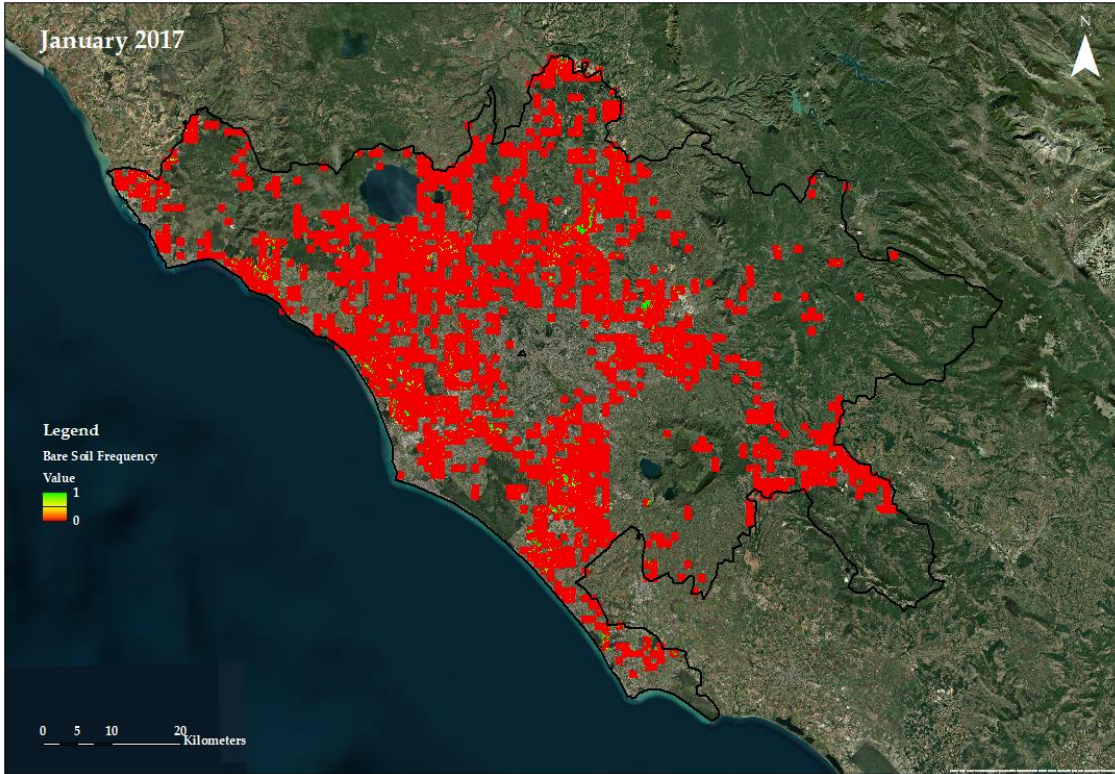

February 2017

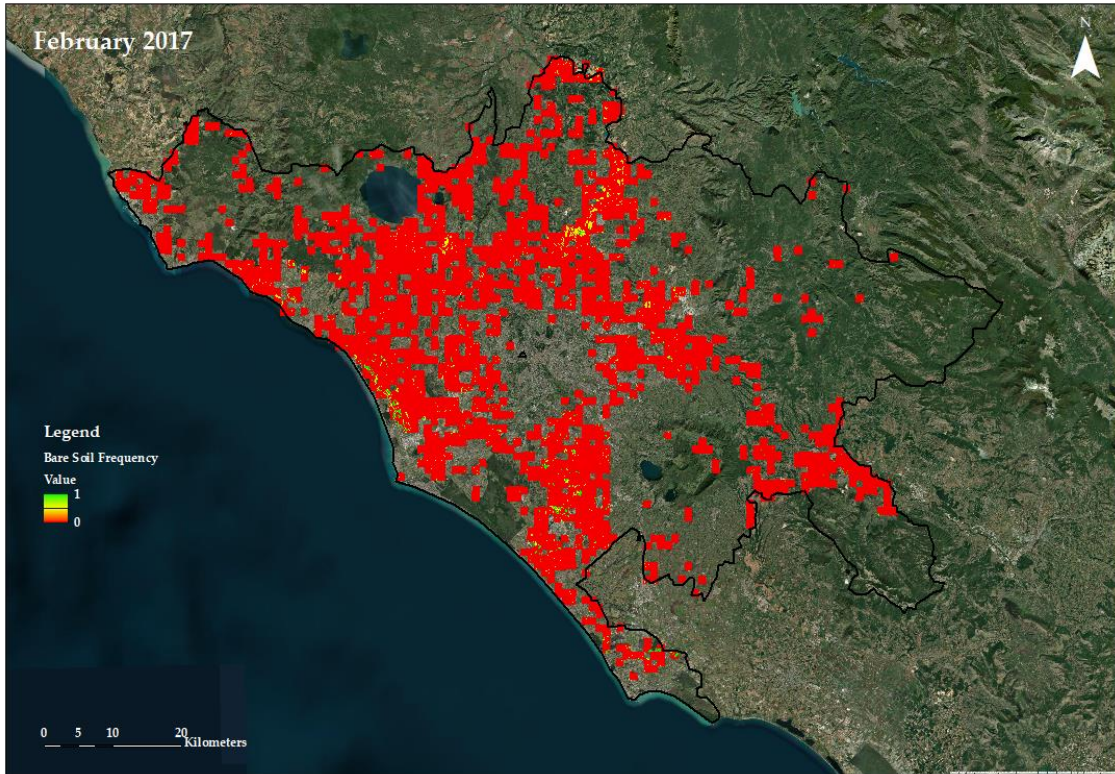



March 2017

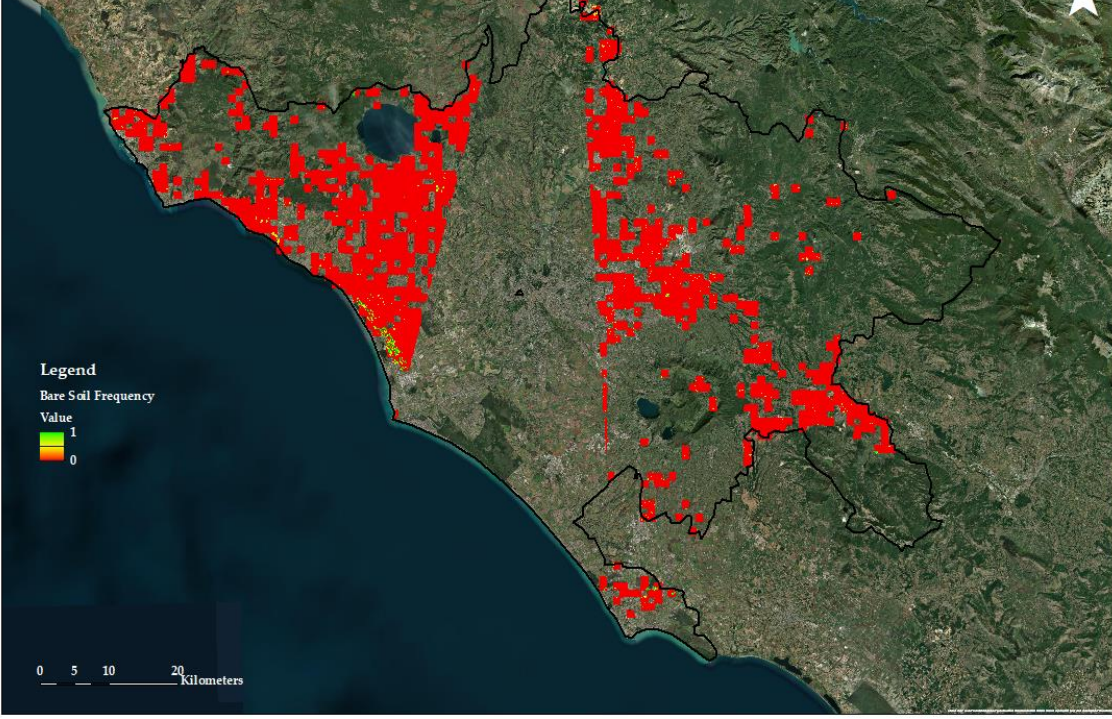

Legend  
Bare Soil Frequency  
Value  
1  
0

0 5 10 20 Kilometers

April 2017

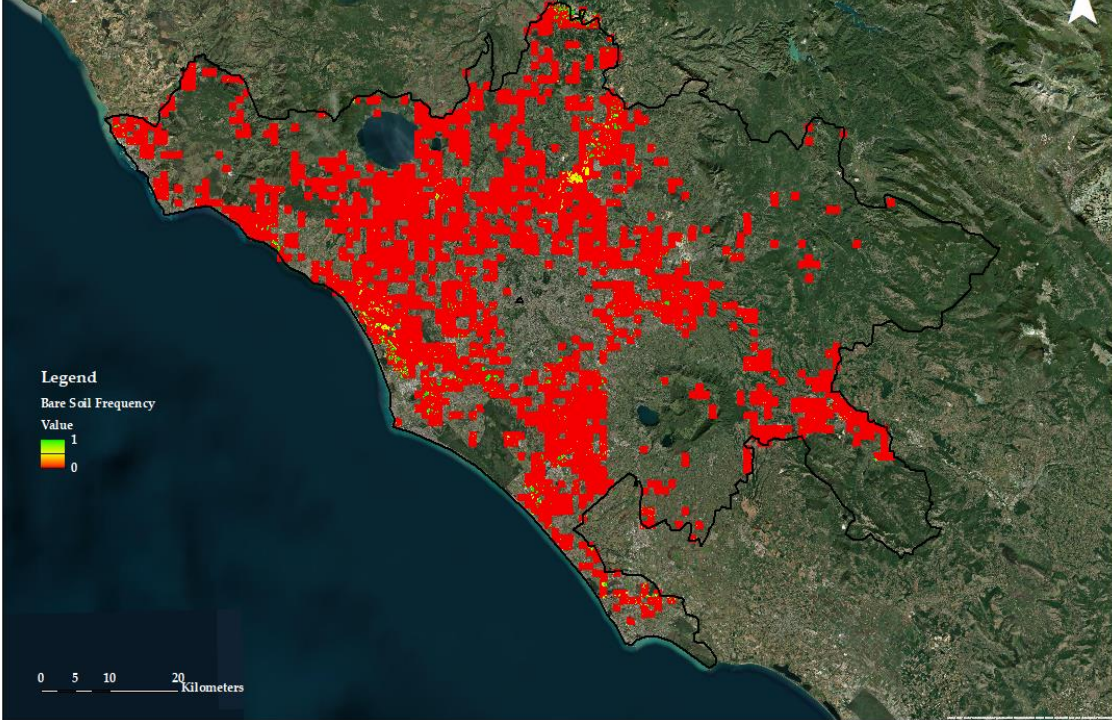

Legend  
Bare Soil Frequency  
Value  
1  
0

0 5 10 20 Kilometers

May 2017

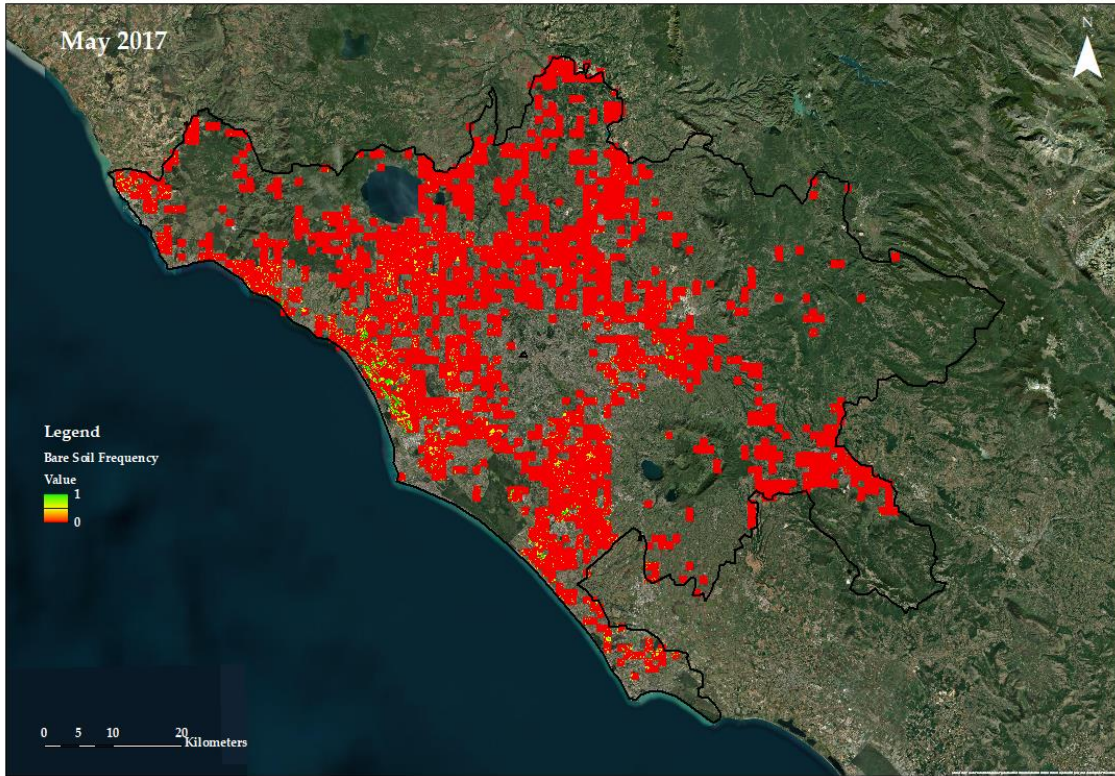

June 2017

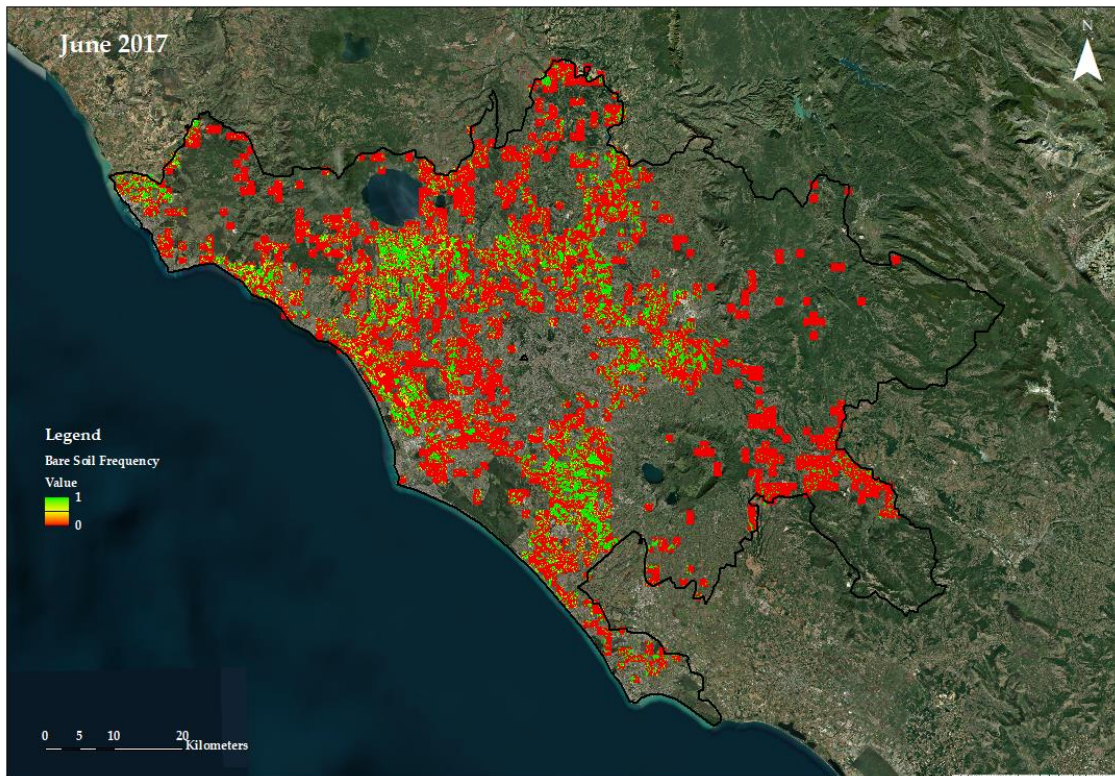

July 2017

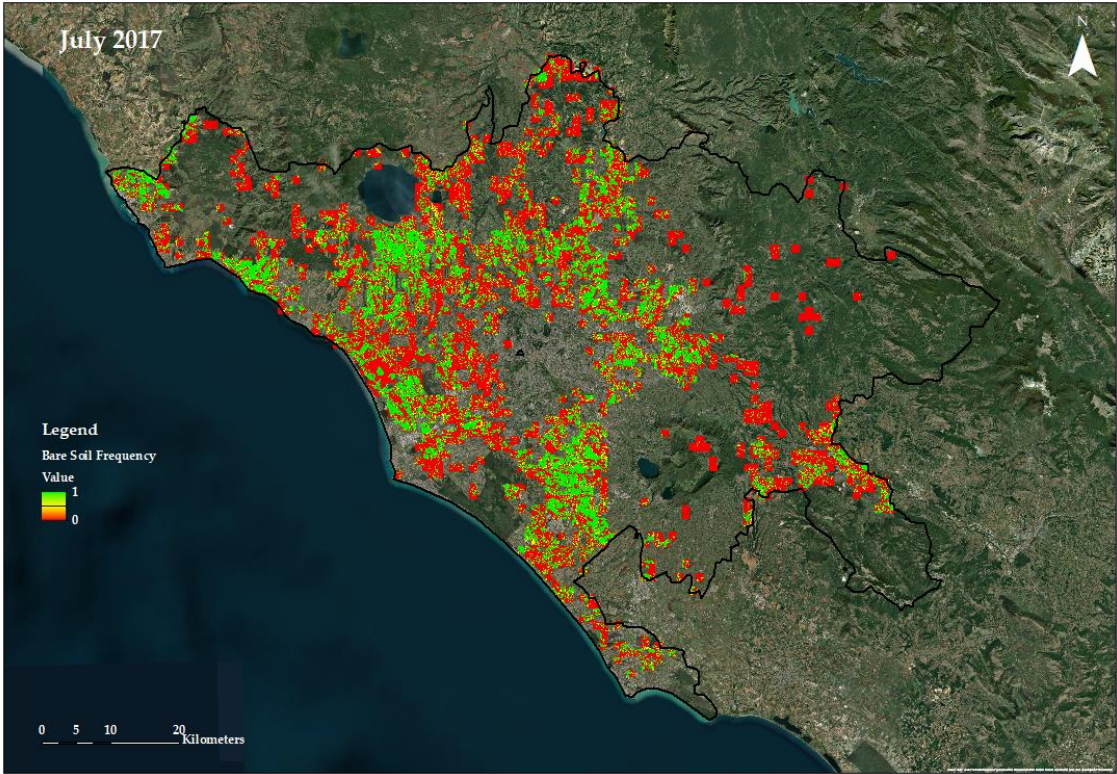

August 2017

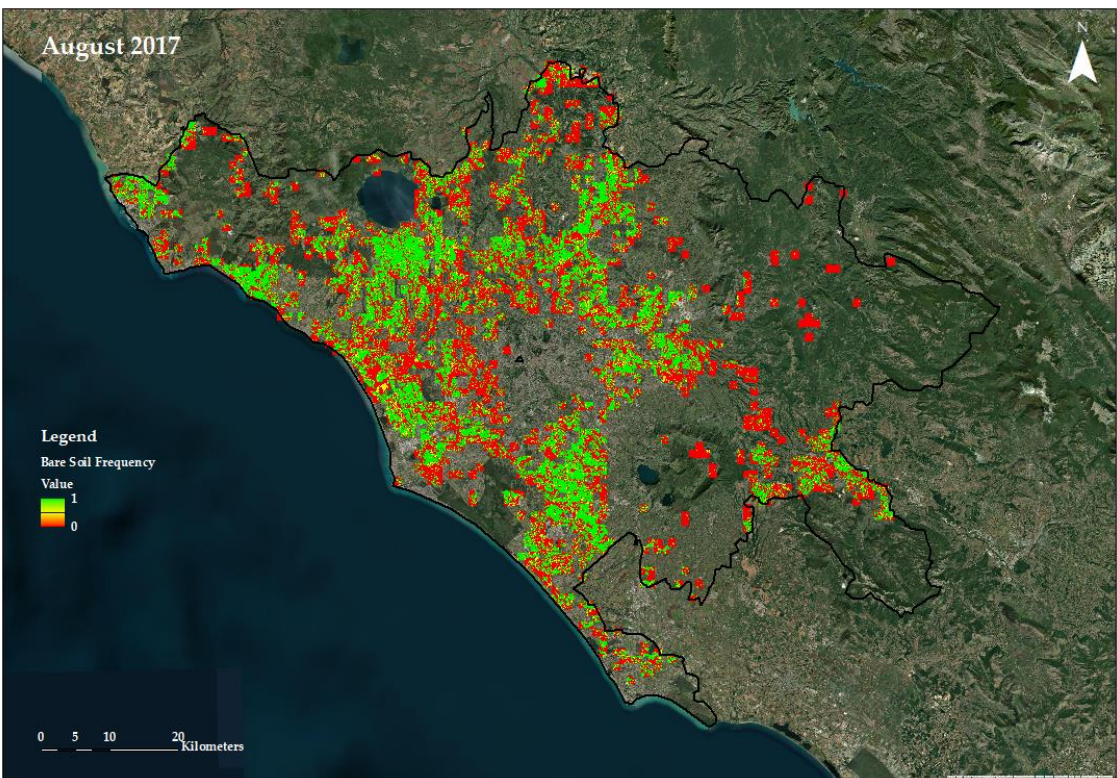

September 2017

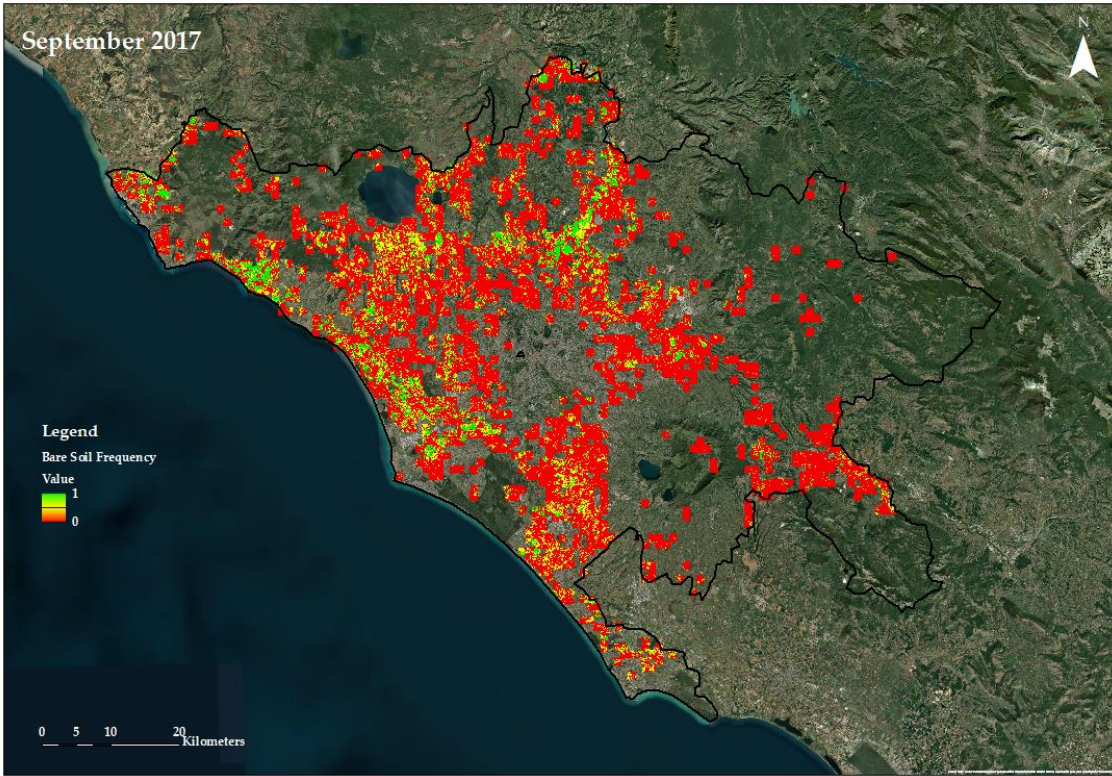

October 2017

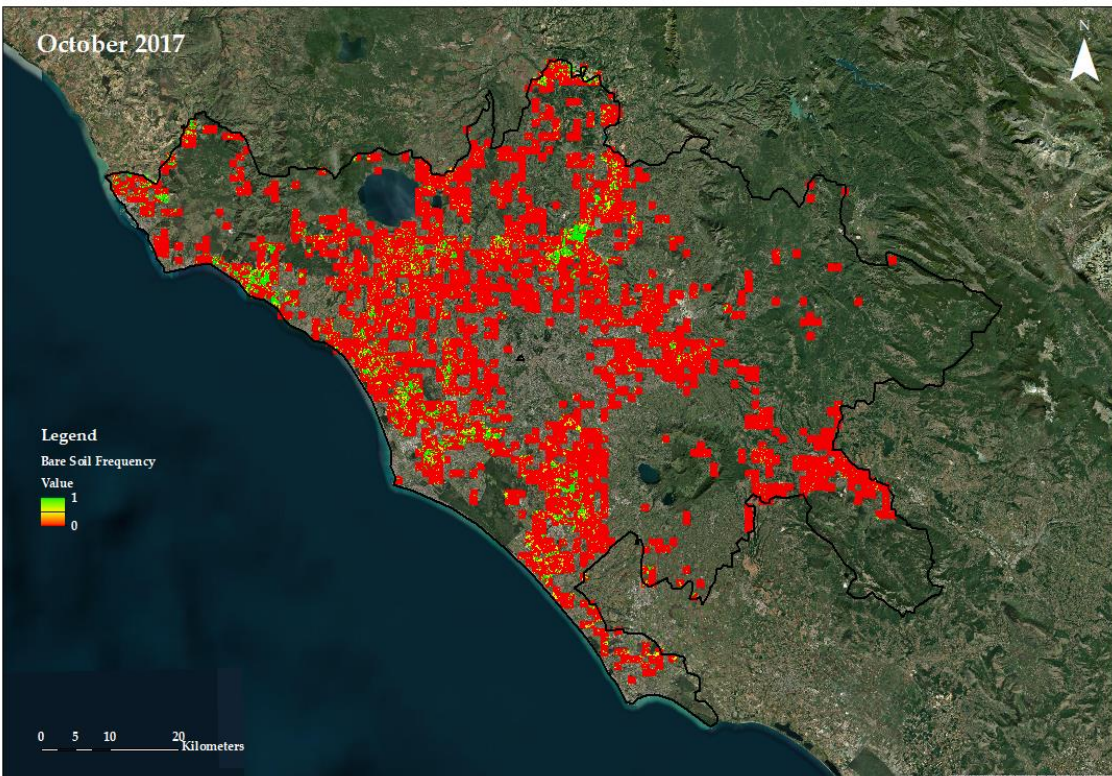

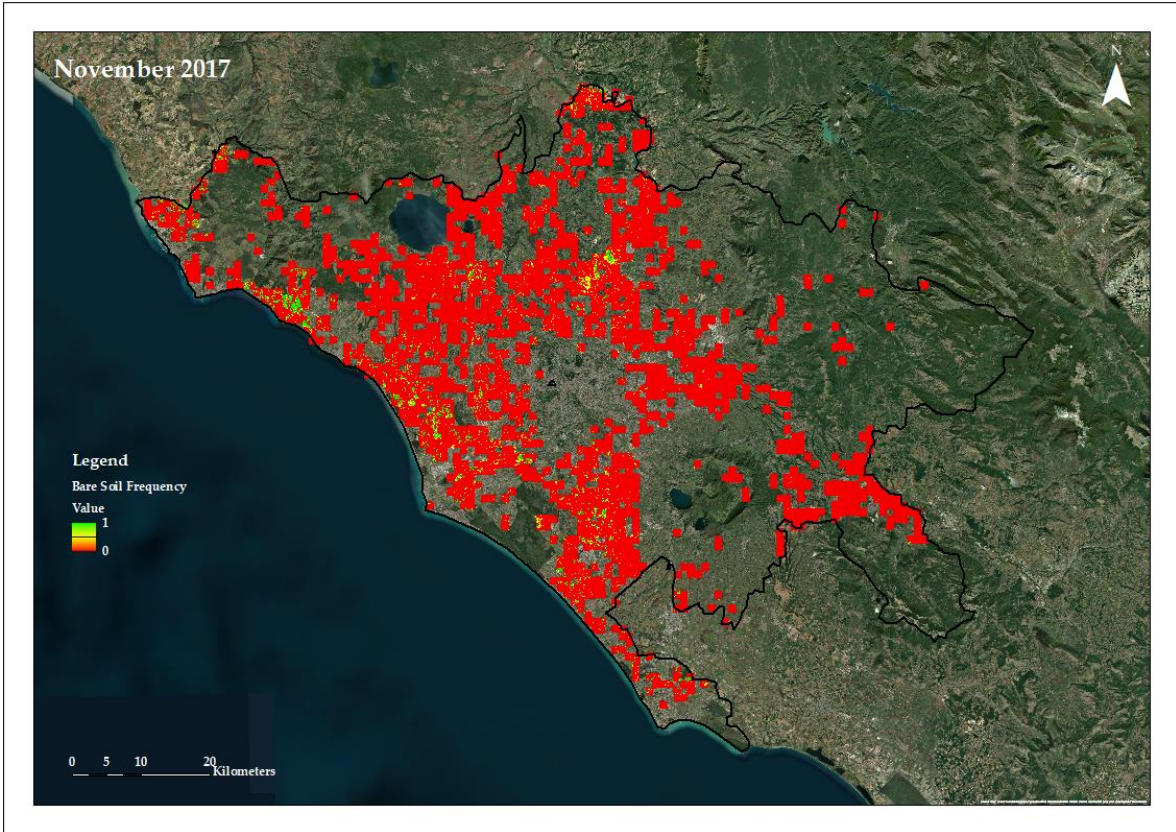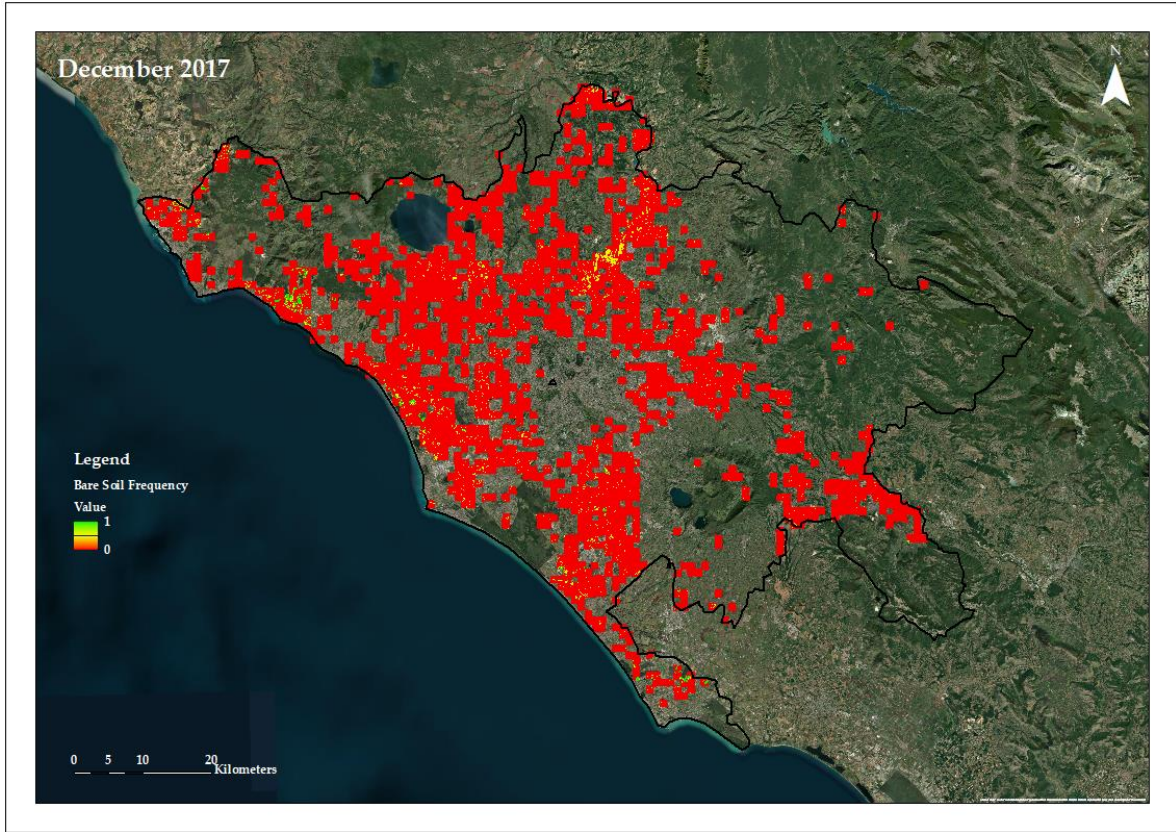

**Figure S6.** Yearly Bare Soil Frequency of the Roma region for the agricultural year 2017.

January 2018

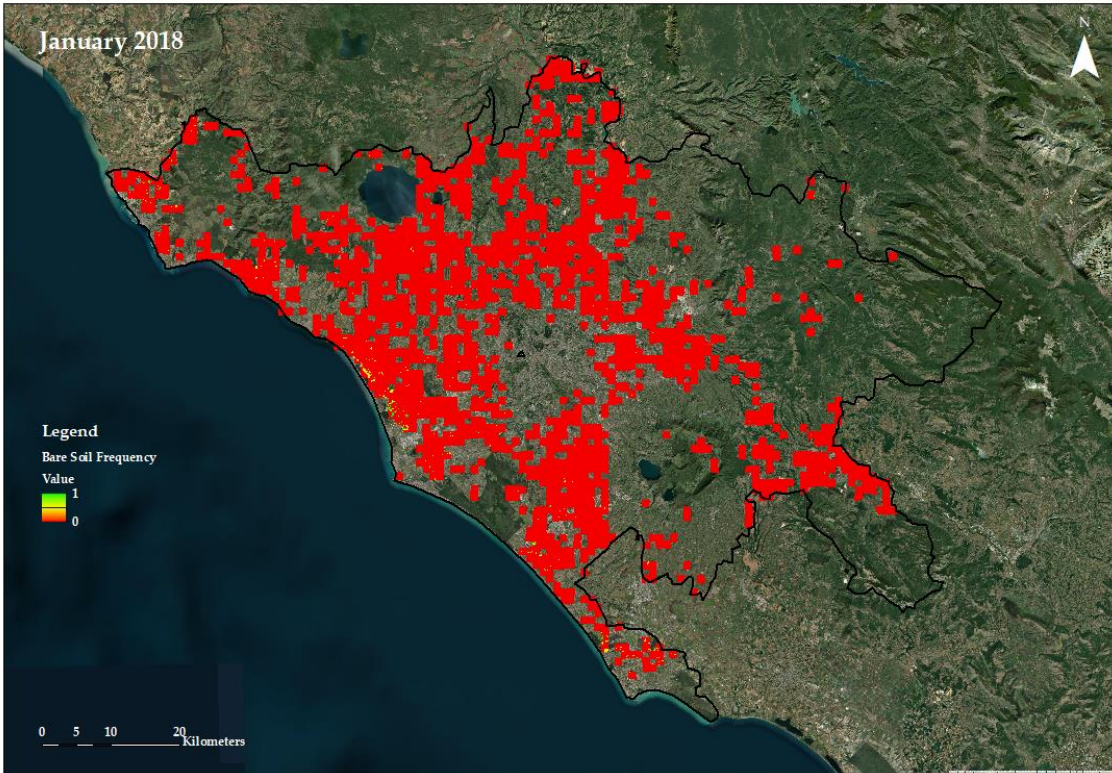

February 2018

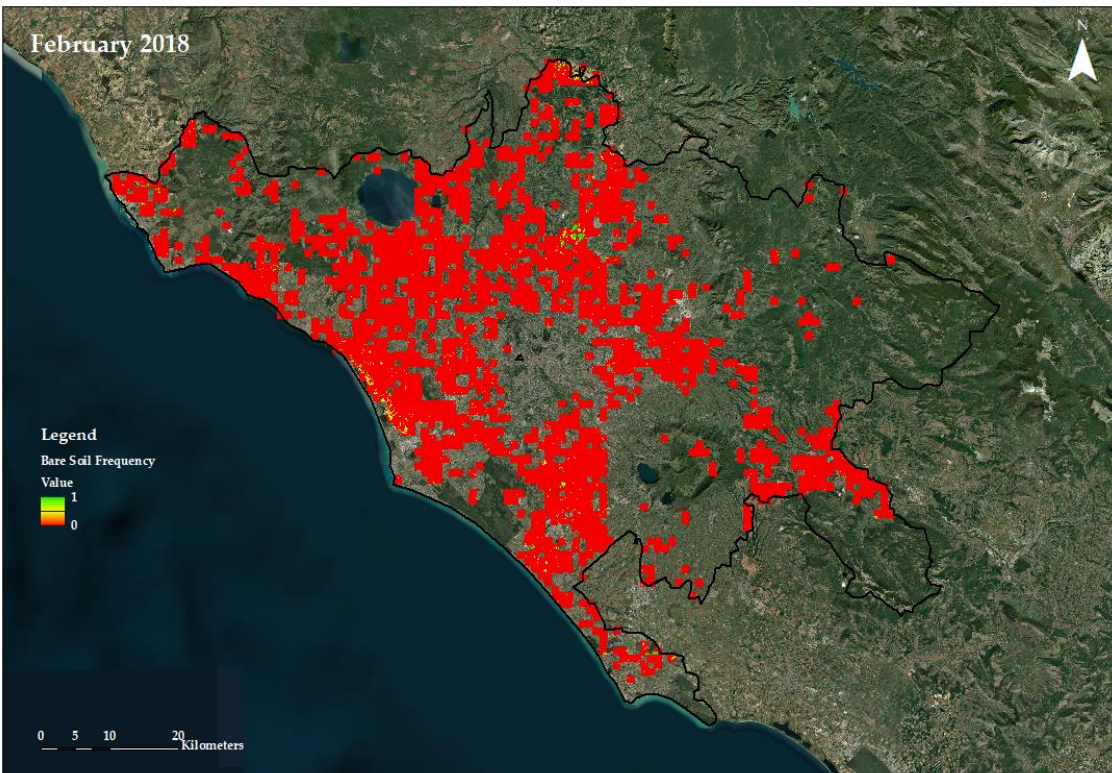

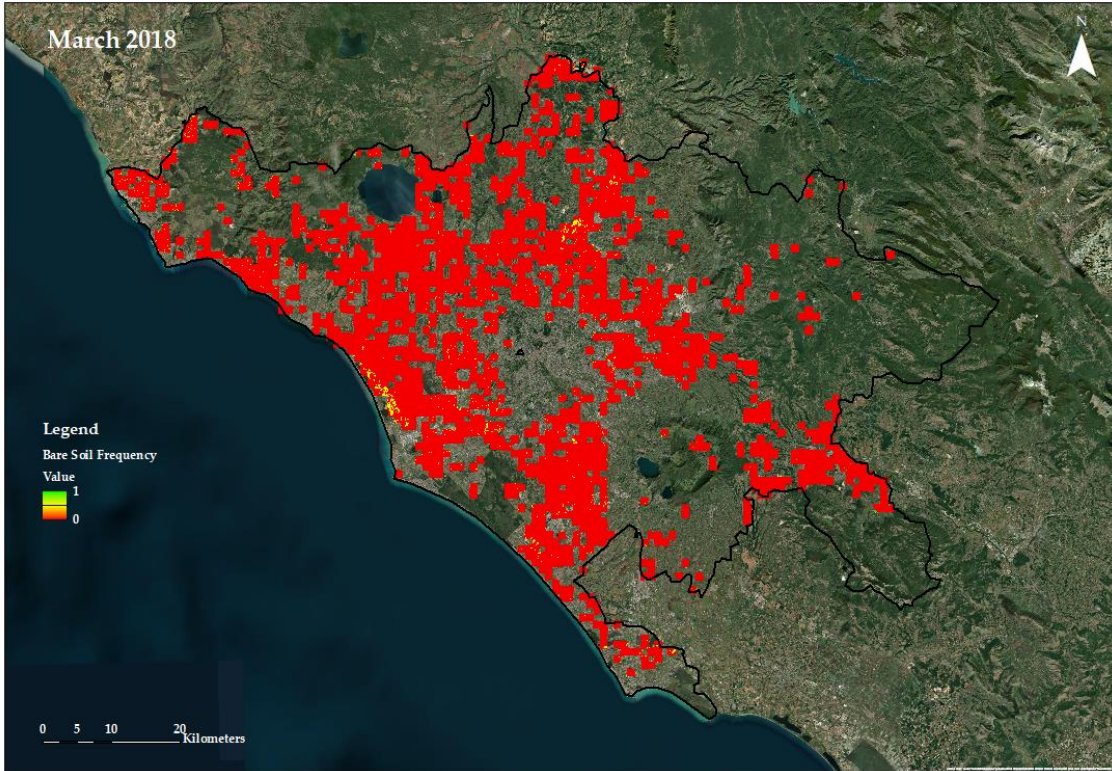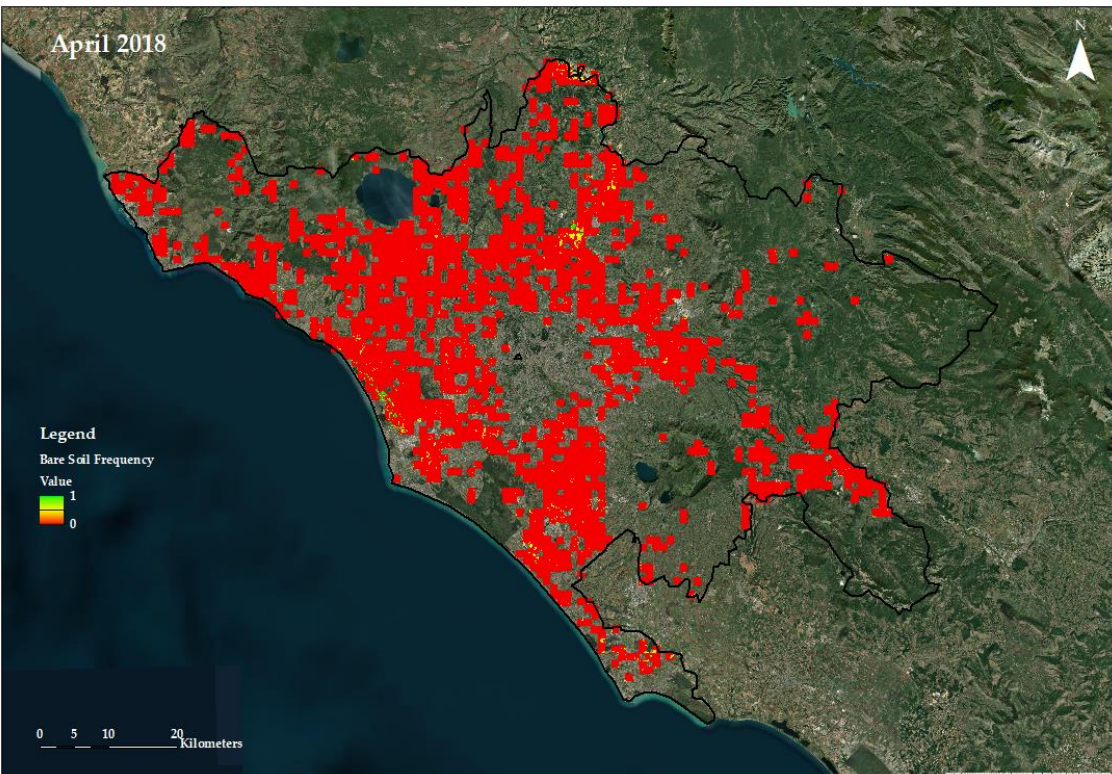

May 2018

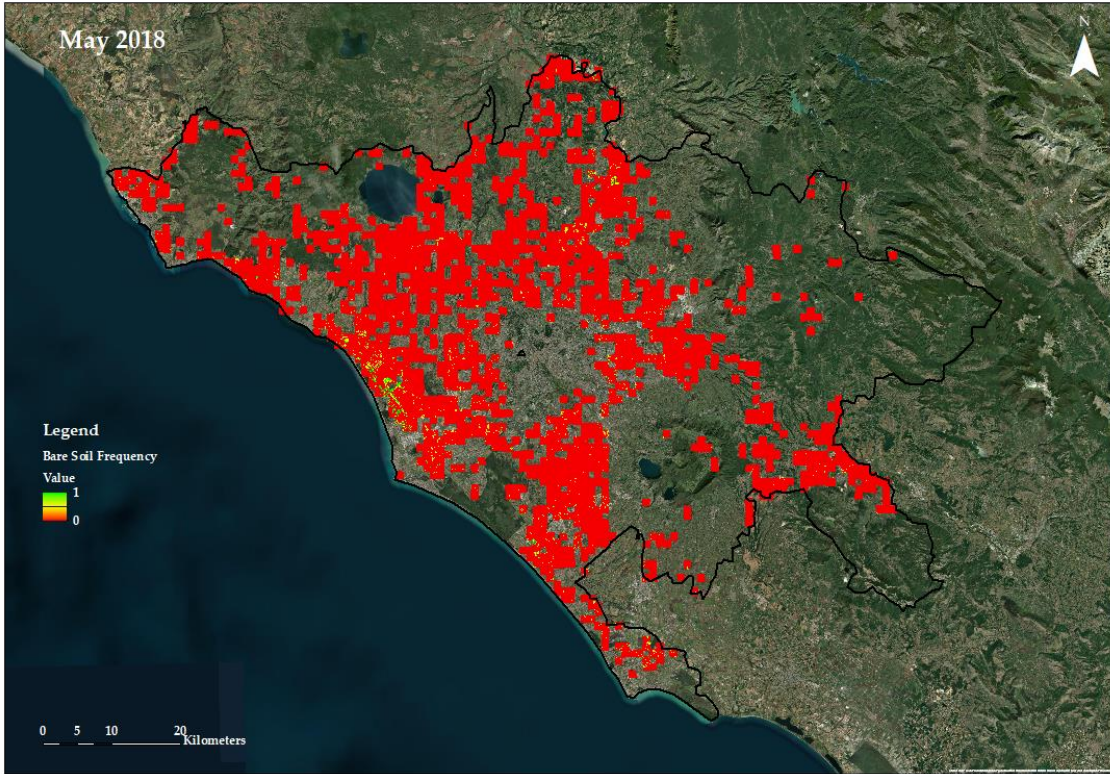

June 2018

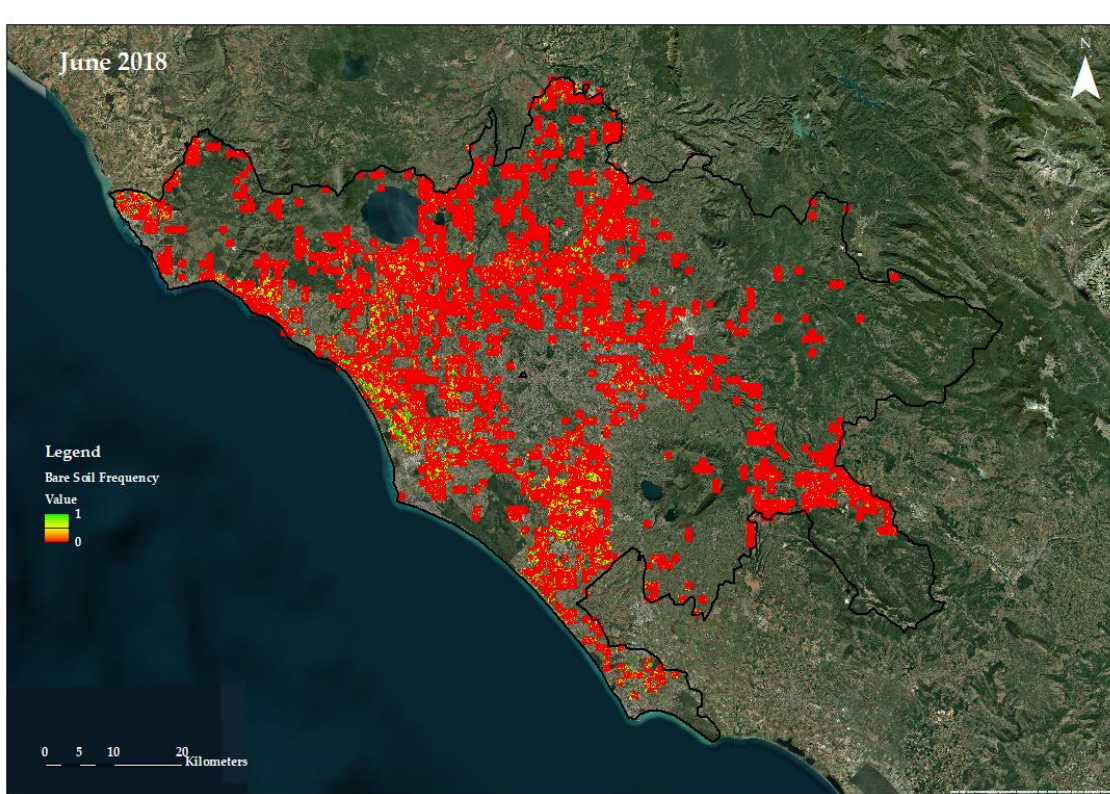



July 2018

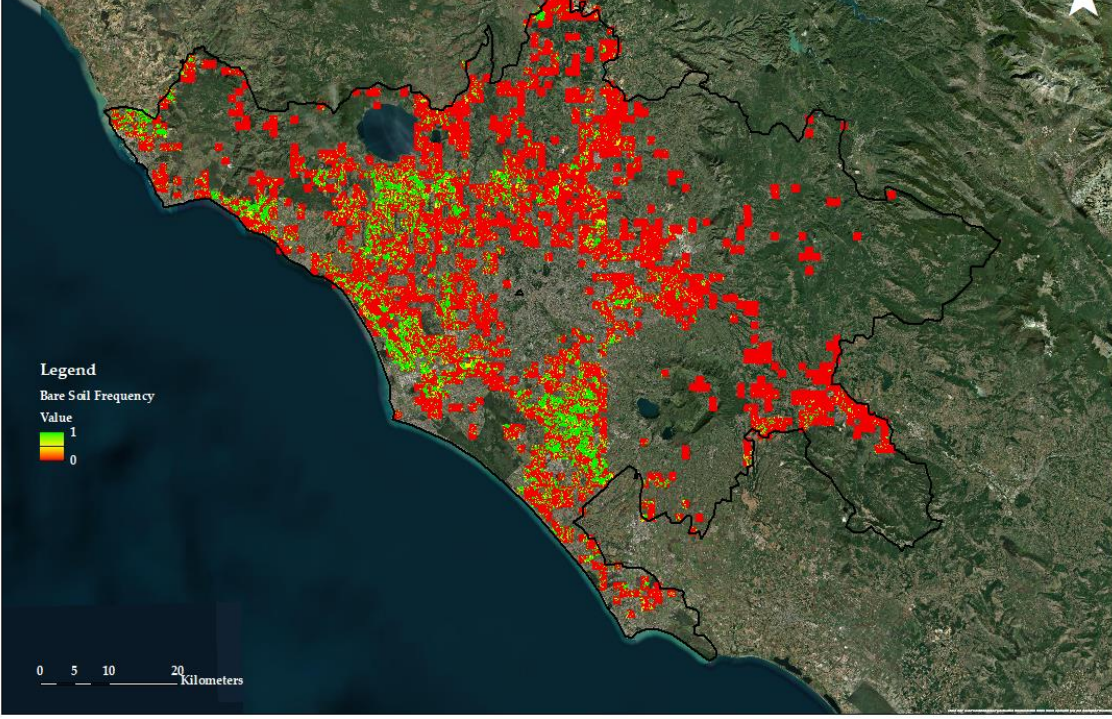

August 2018

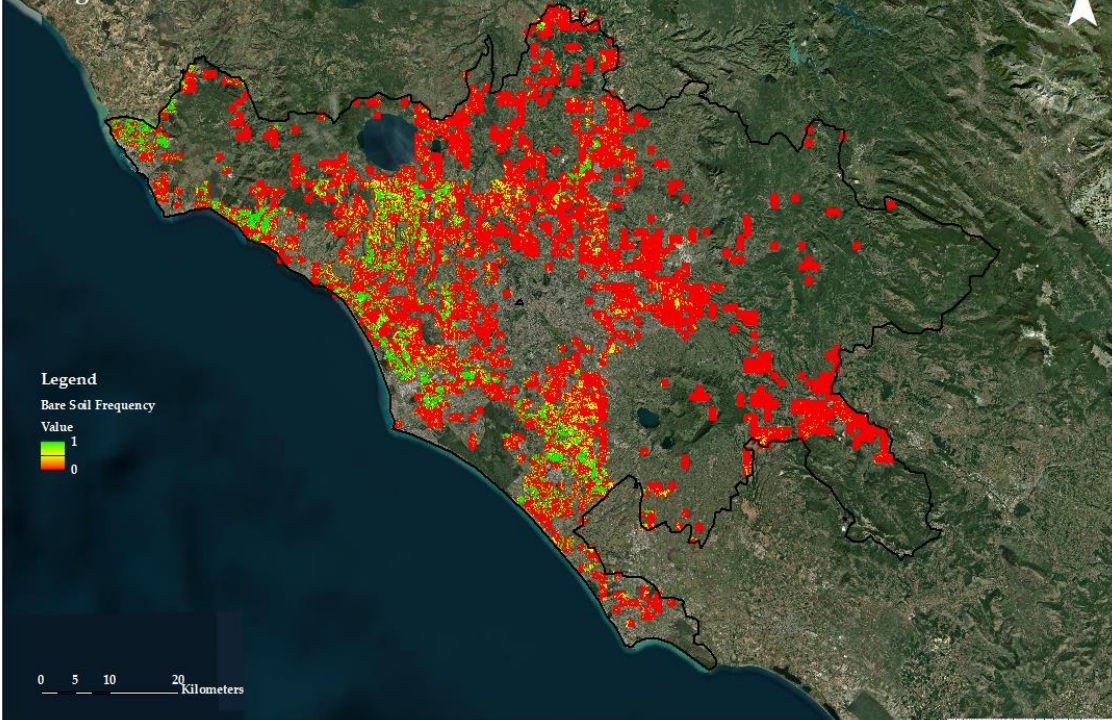

September 2018

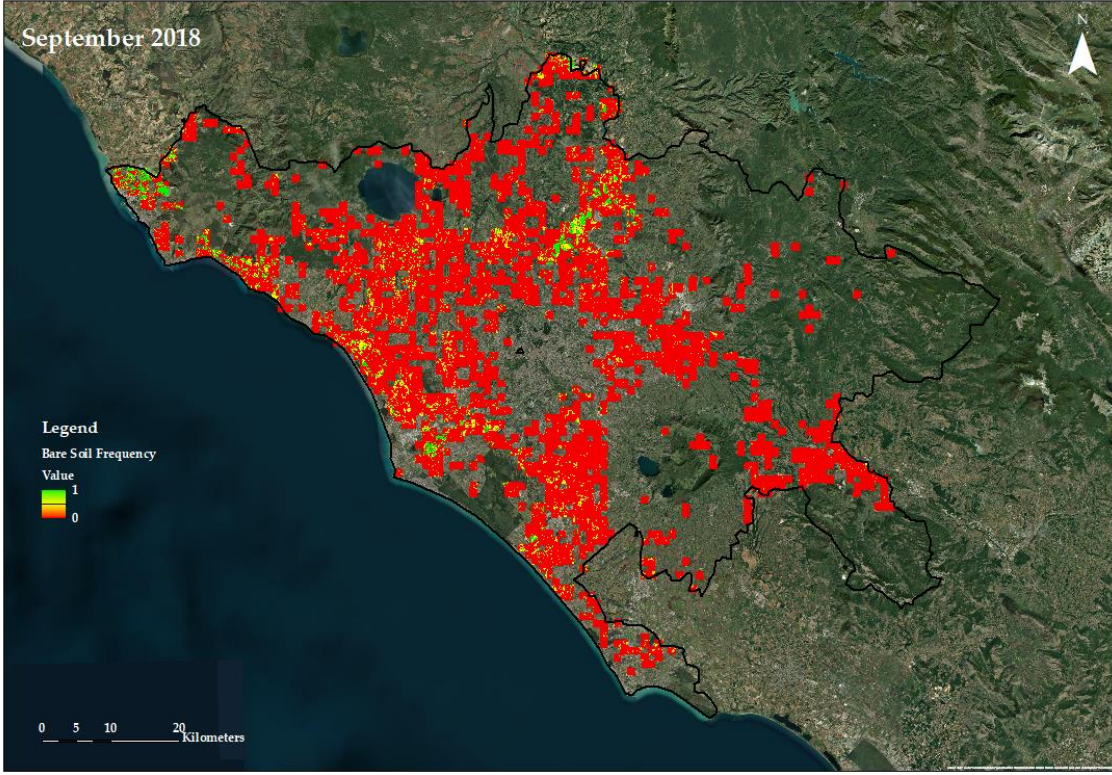

October 2018

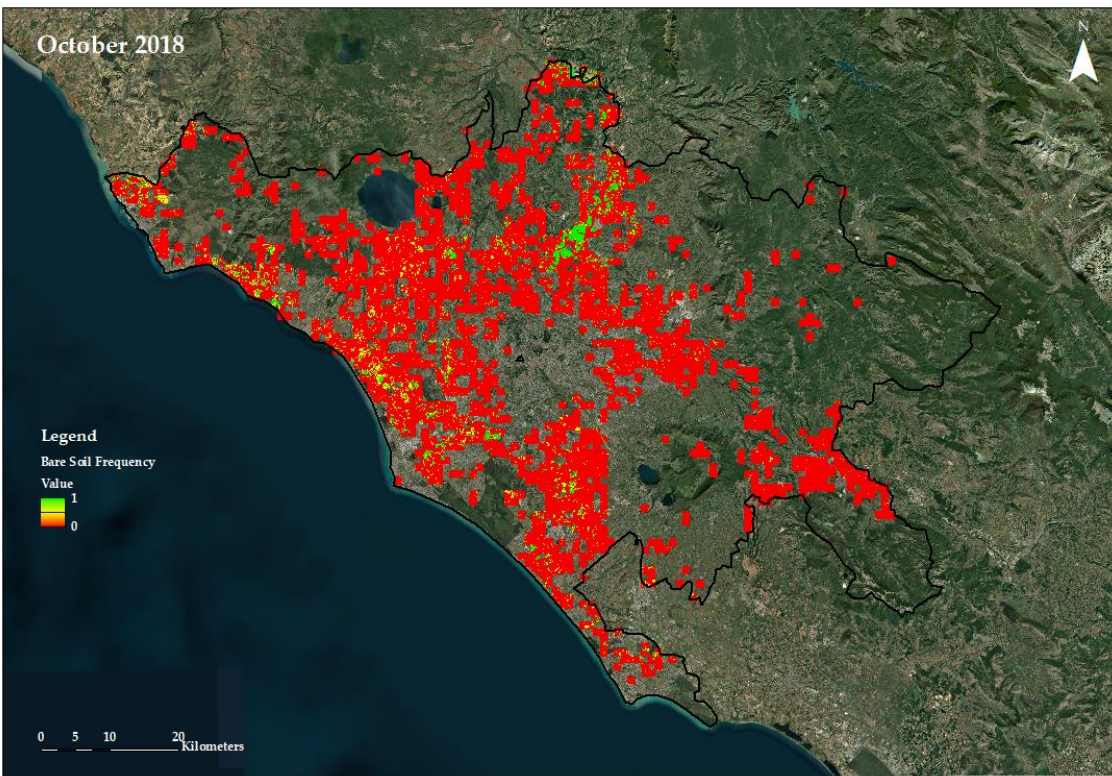

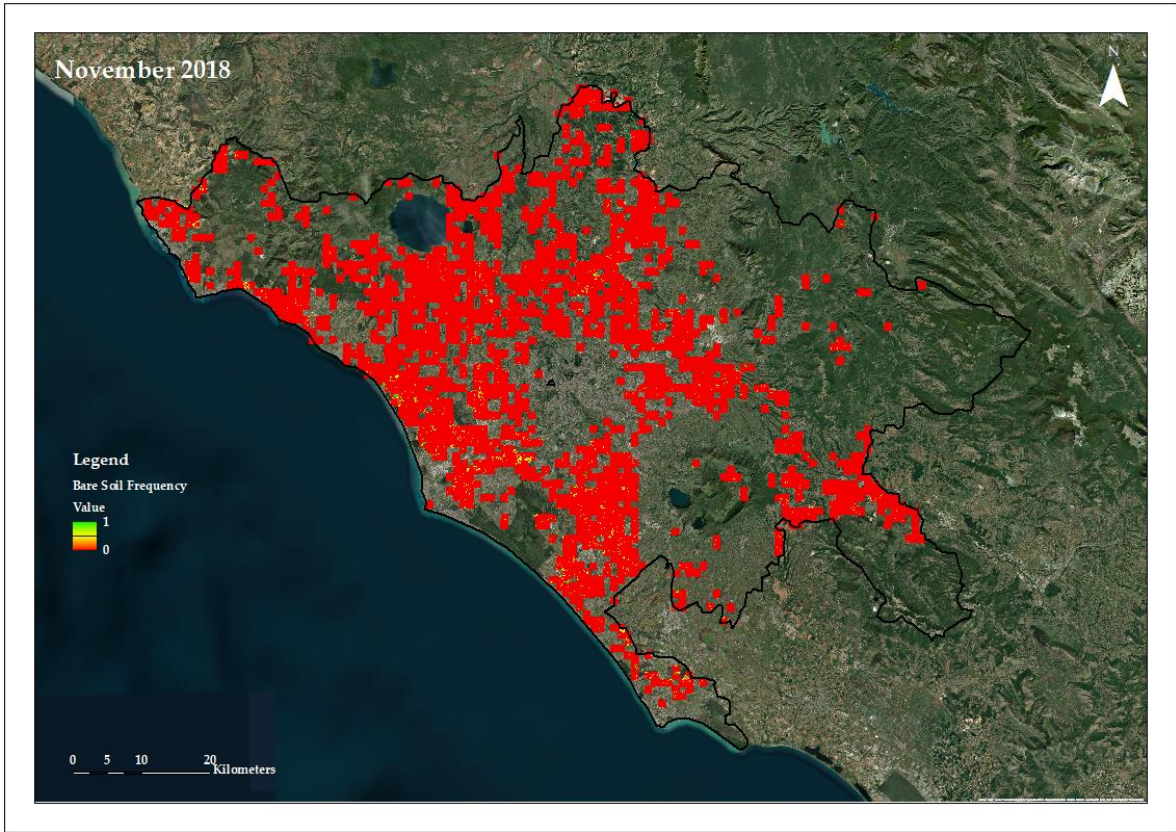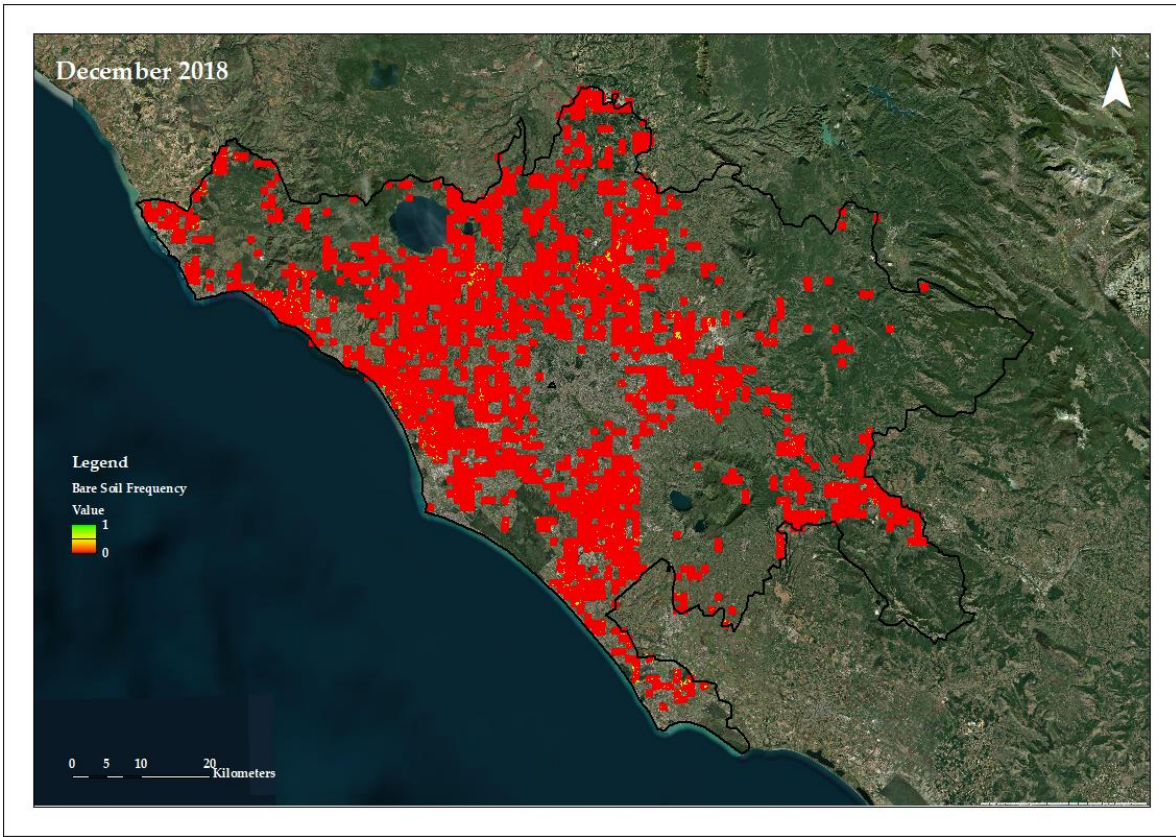

**Figure S7.** Yearly Bare Soil Frequency of the Roma region for the agricultural year 2018.

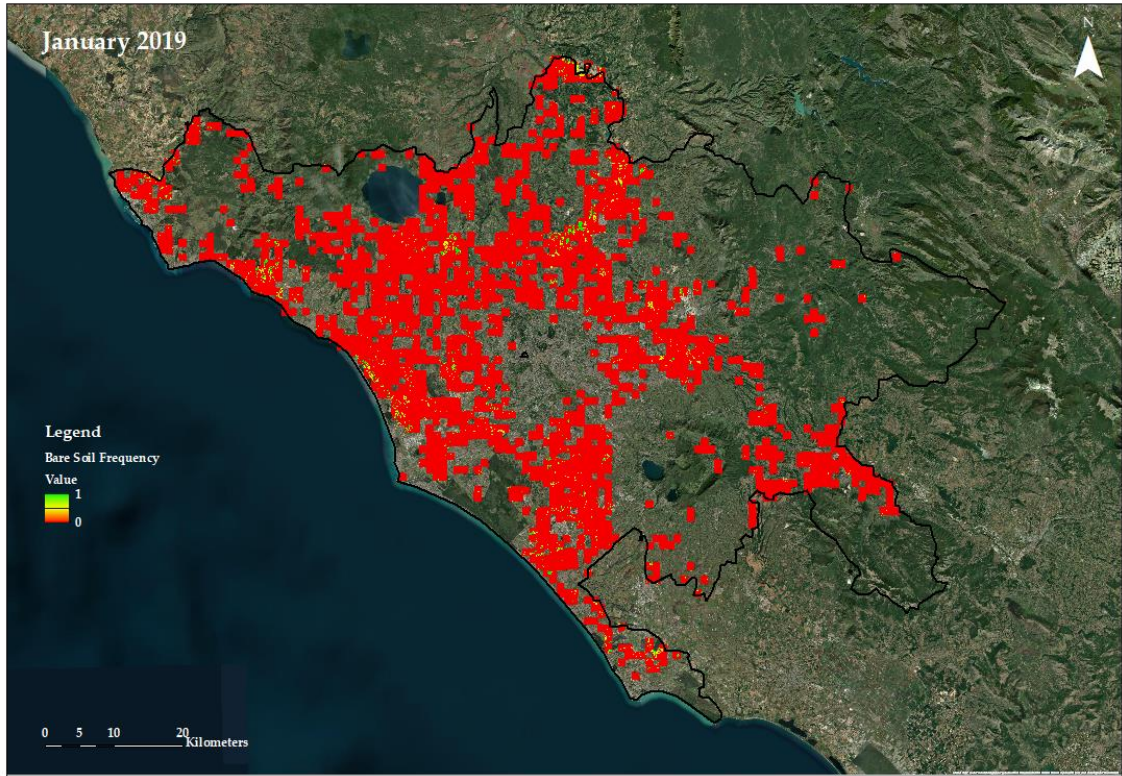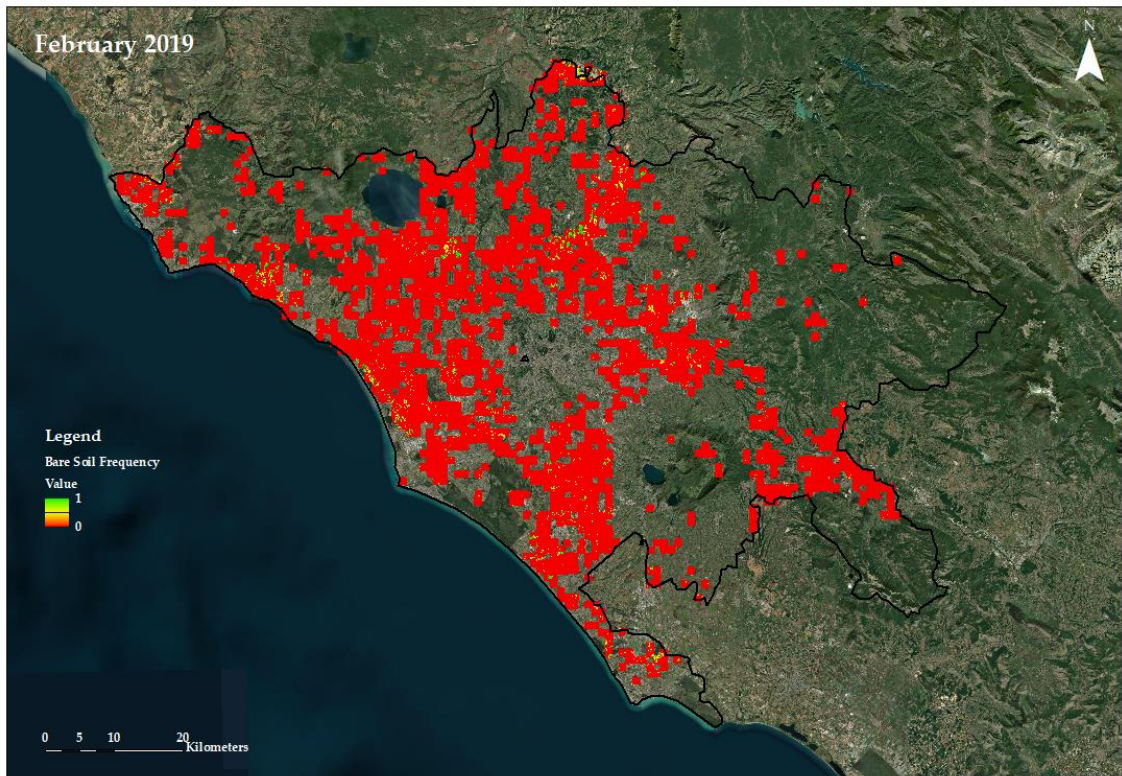

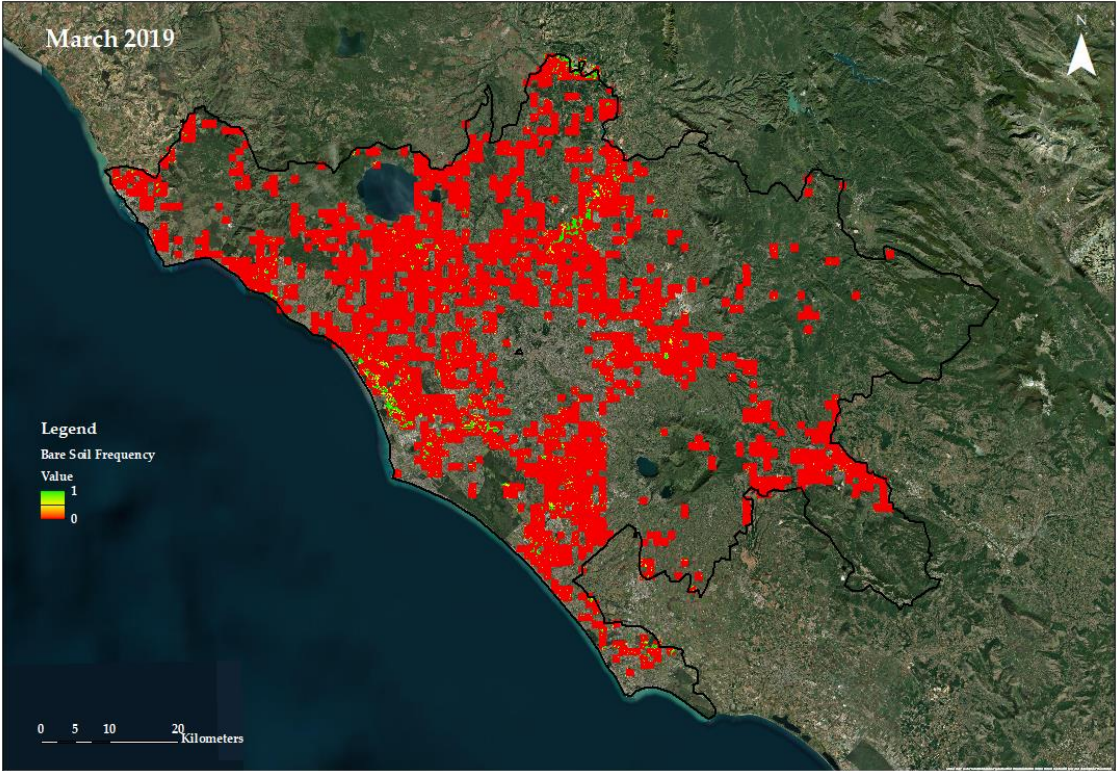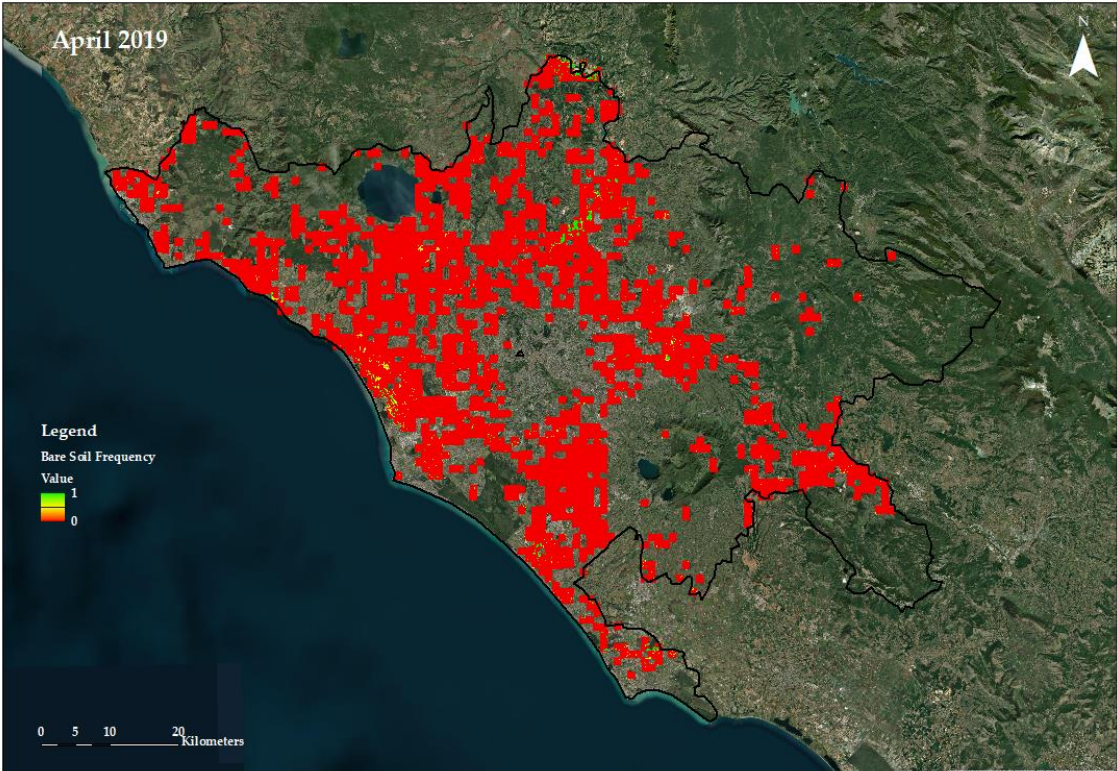

May 2019

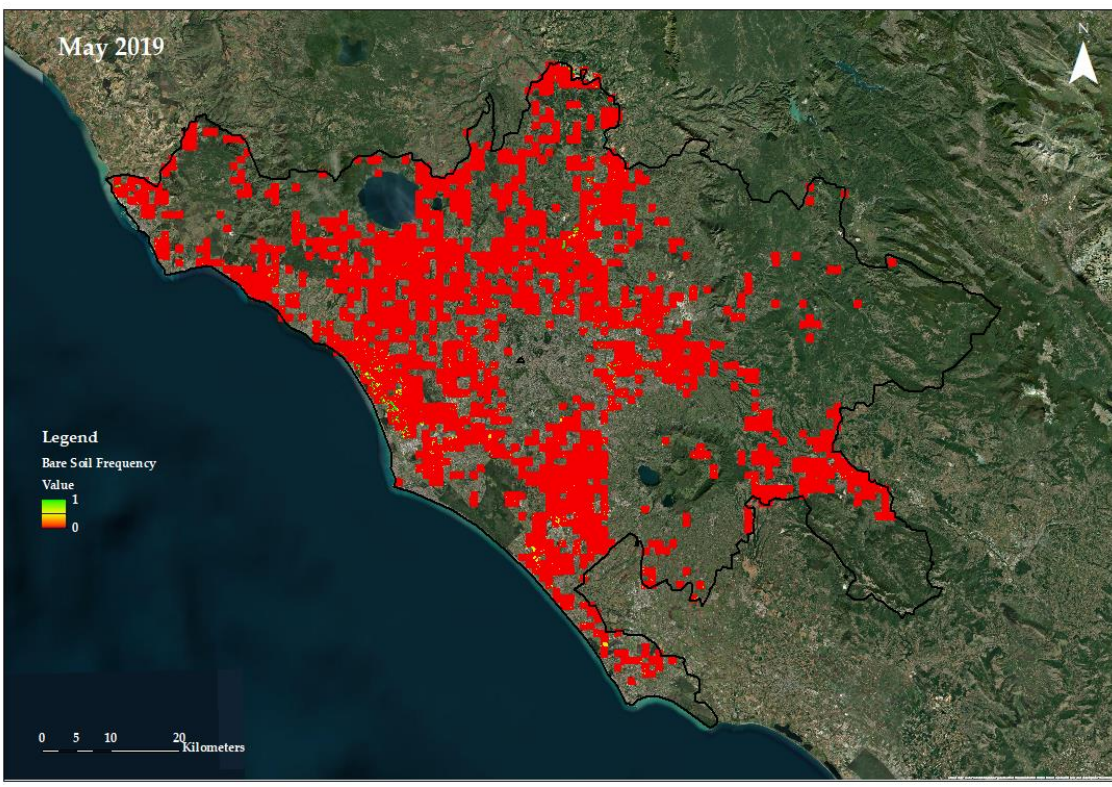

June 2019

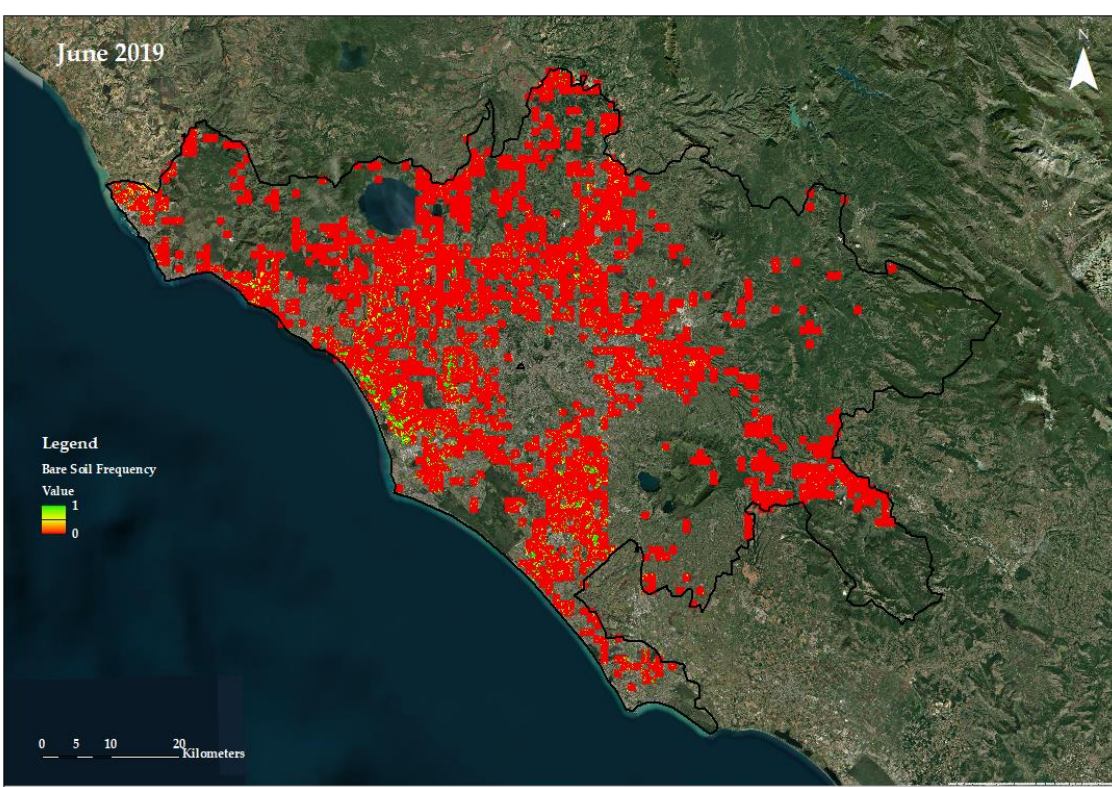

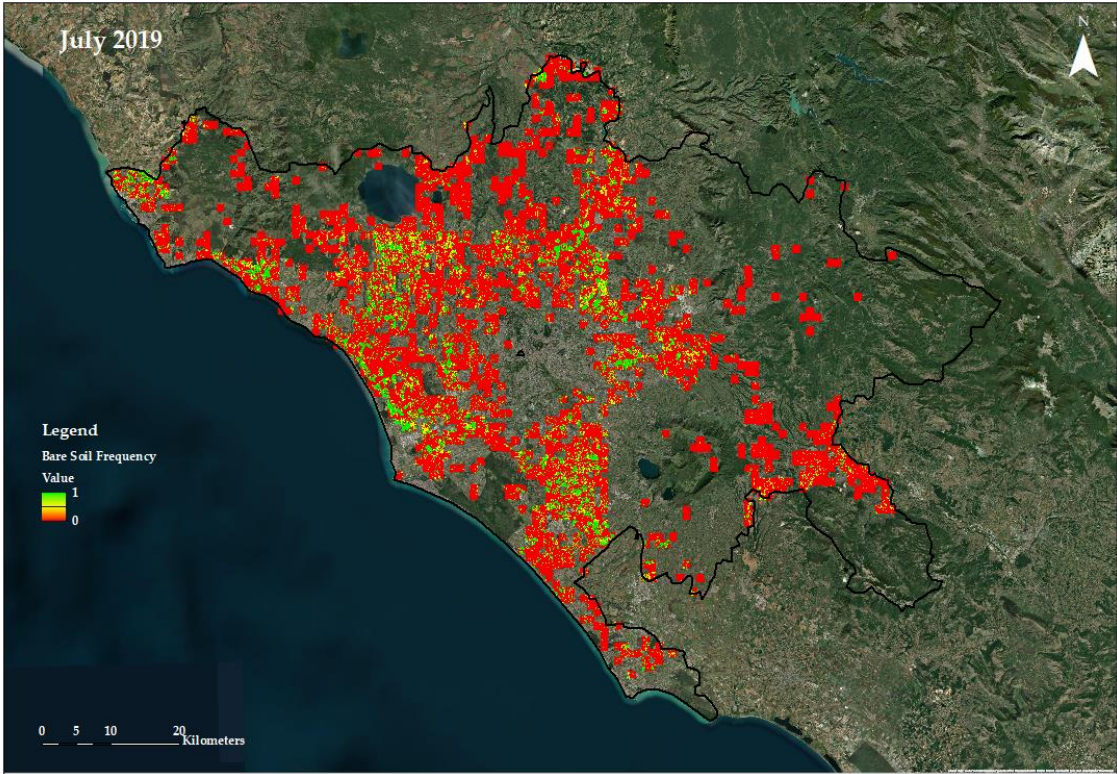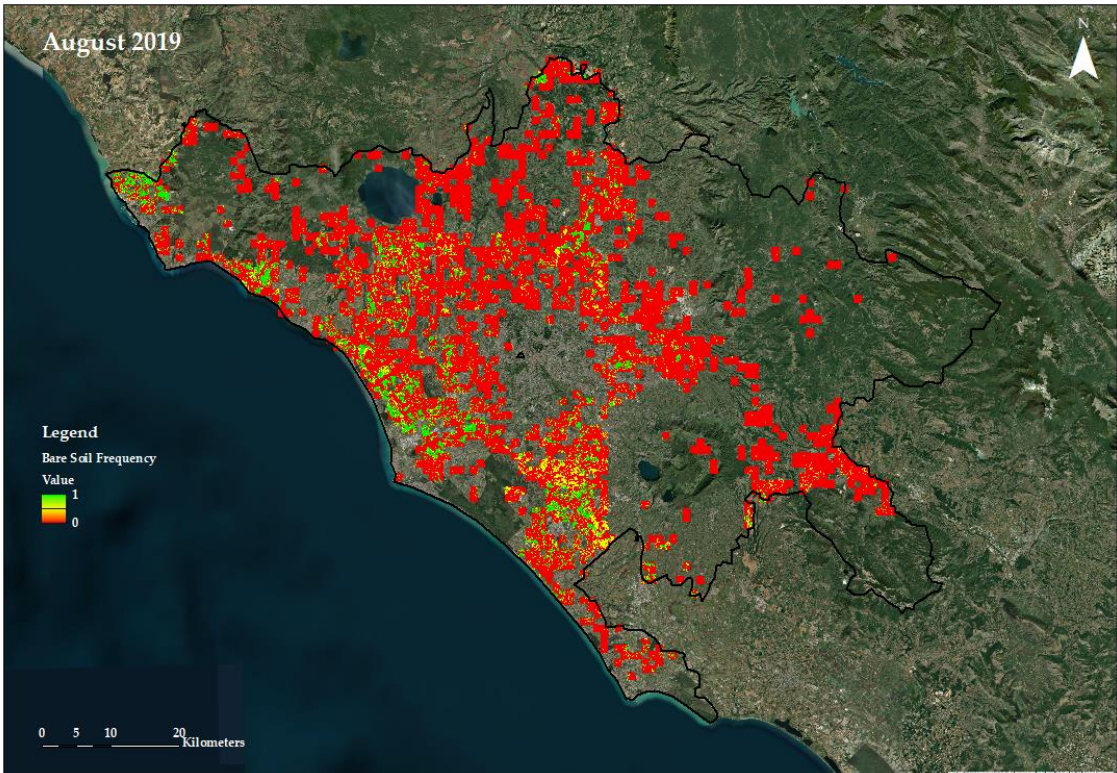

September 2019

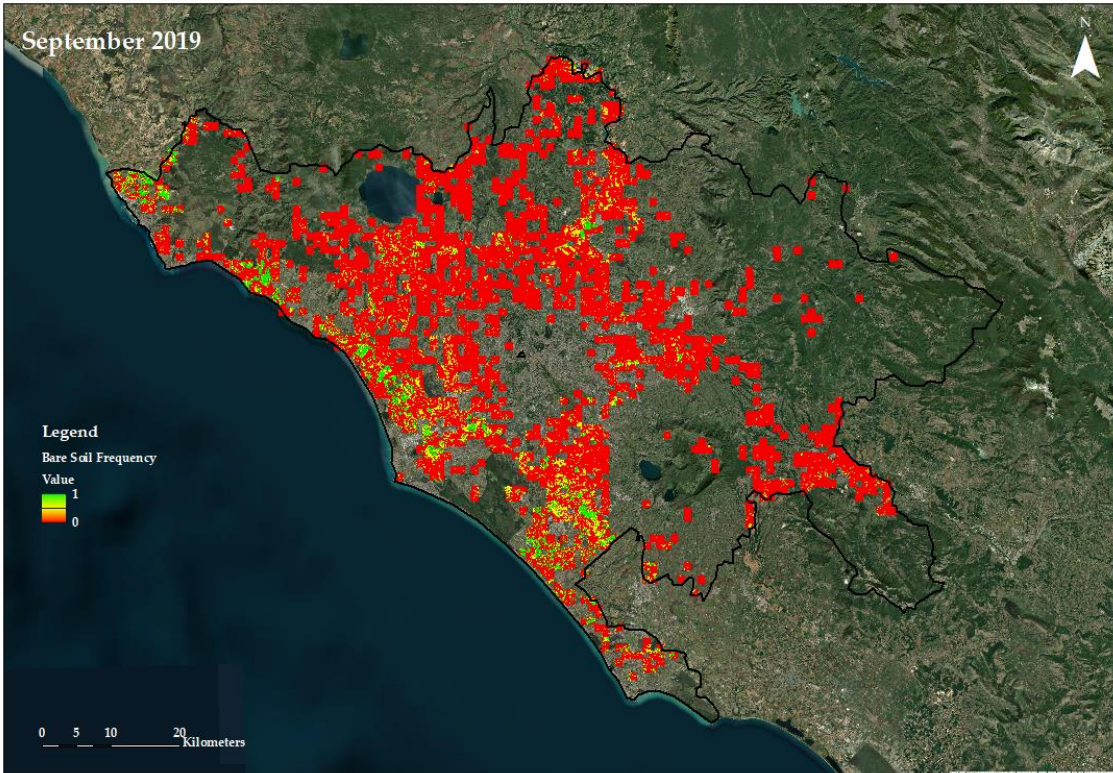

October 2019

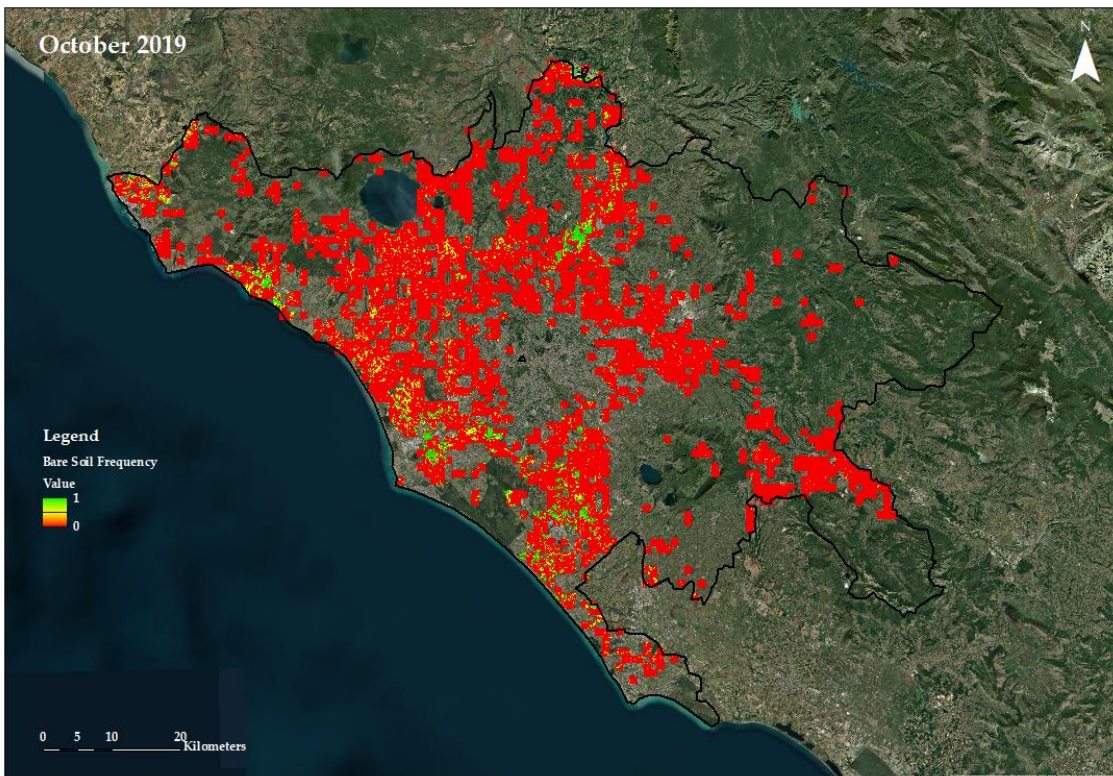



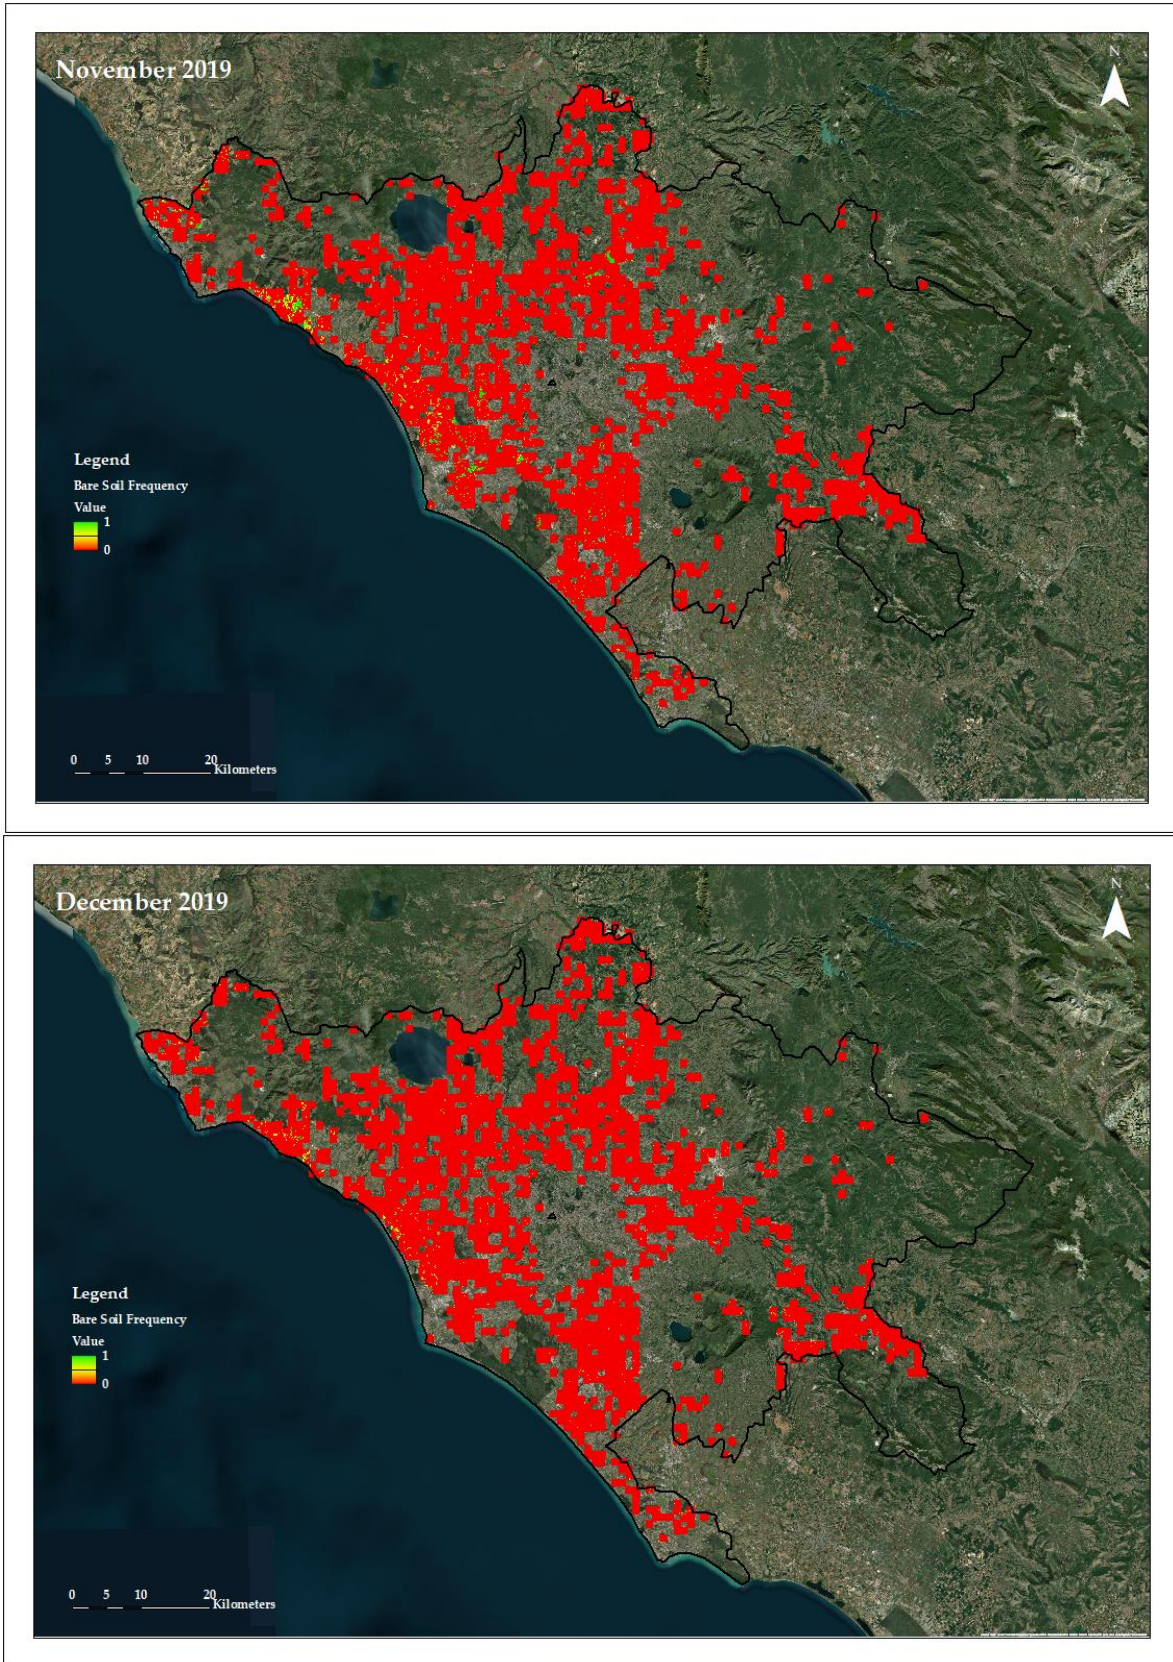

**Figure S8.** Yearly Bare Soil Frequency of the Roma region for the agricultural year 2019.

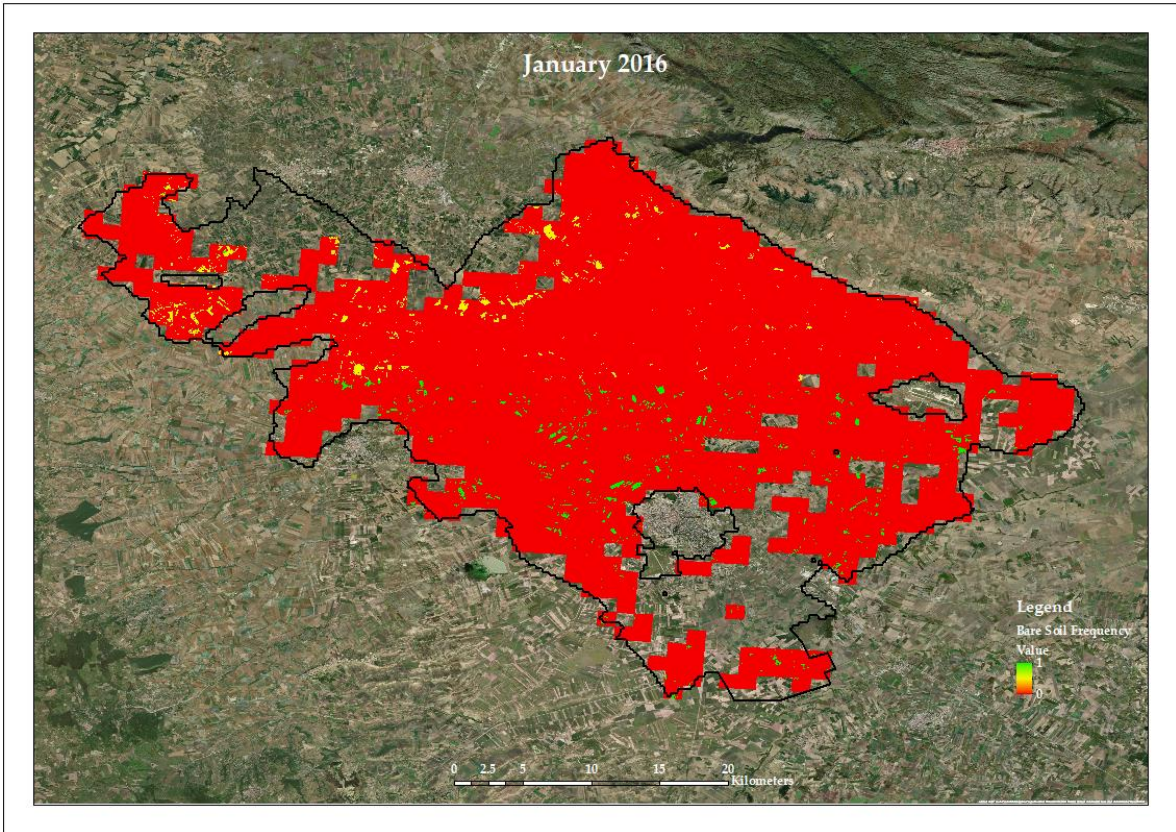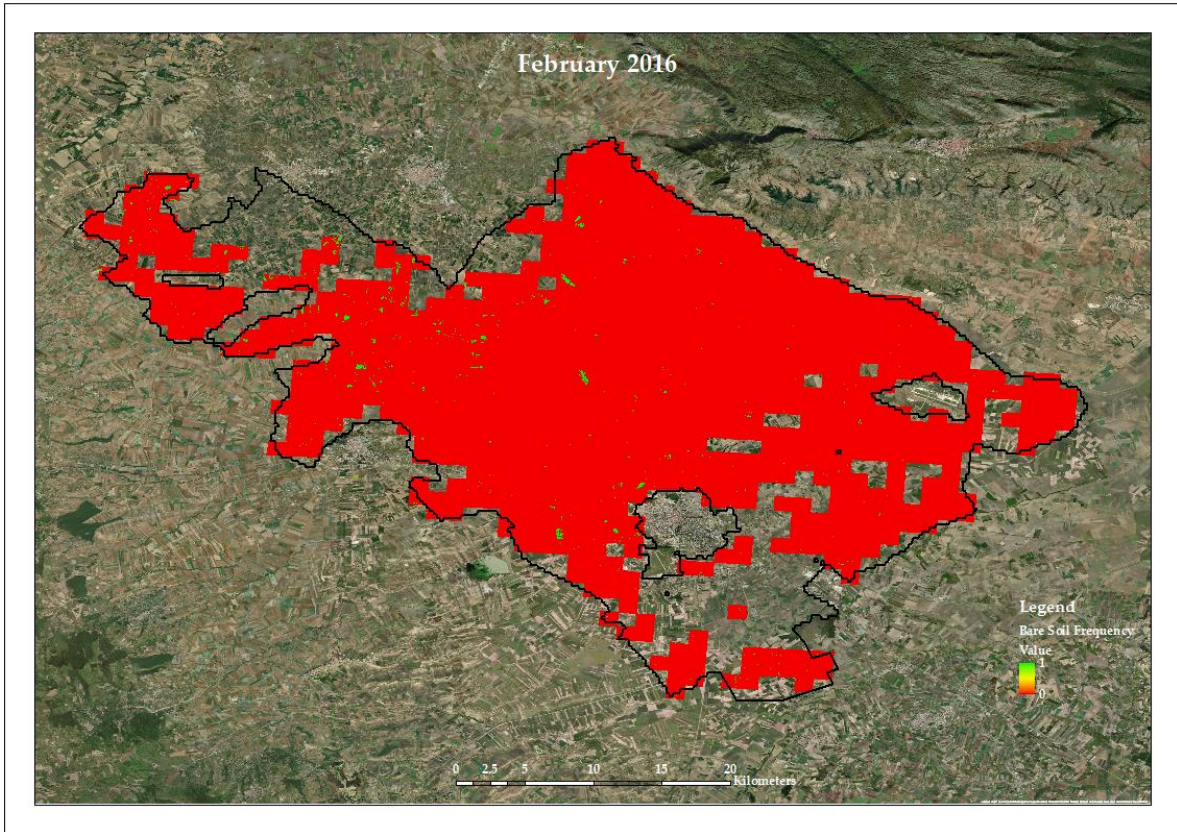

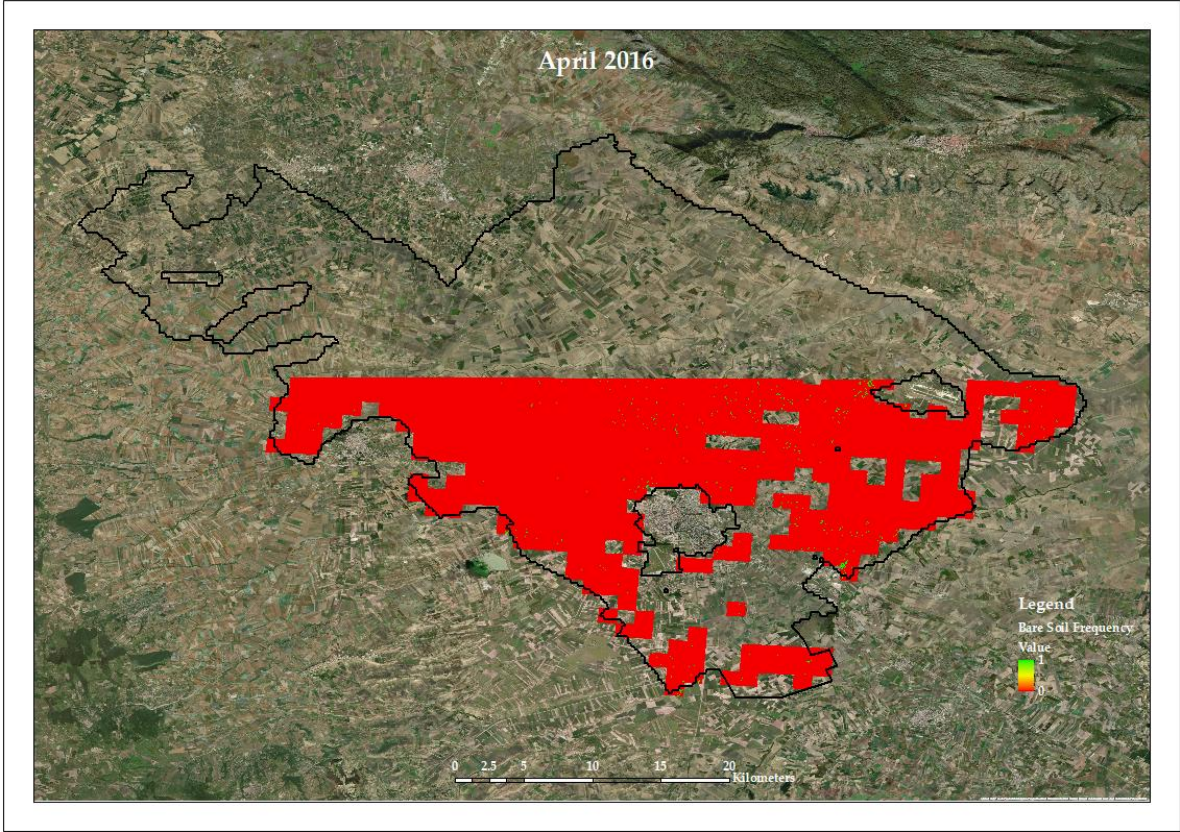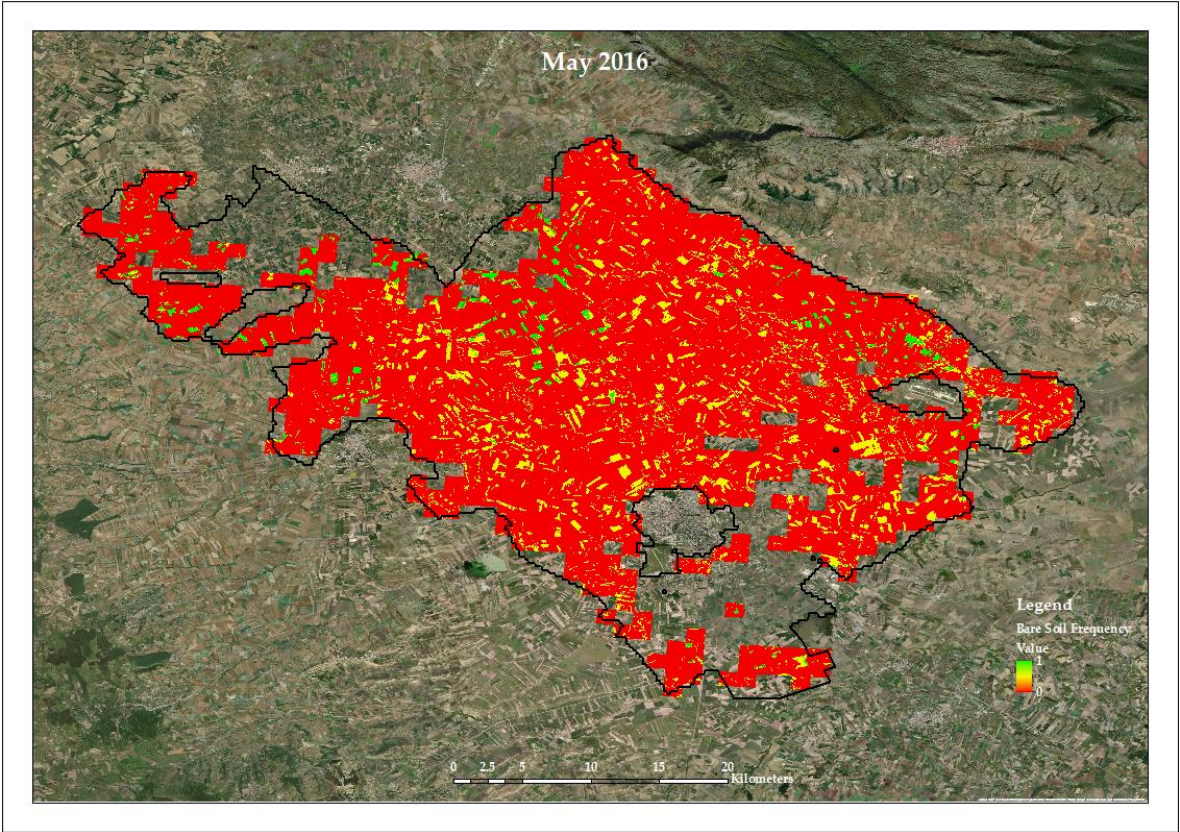

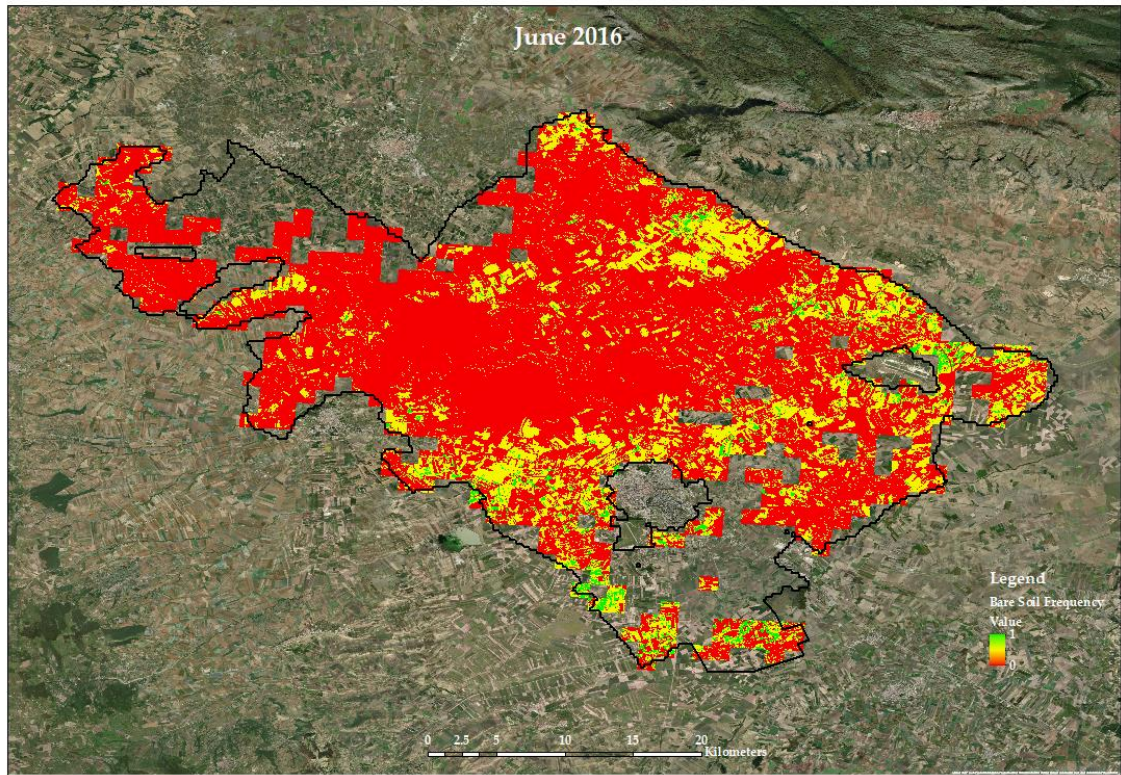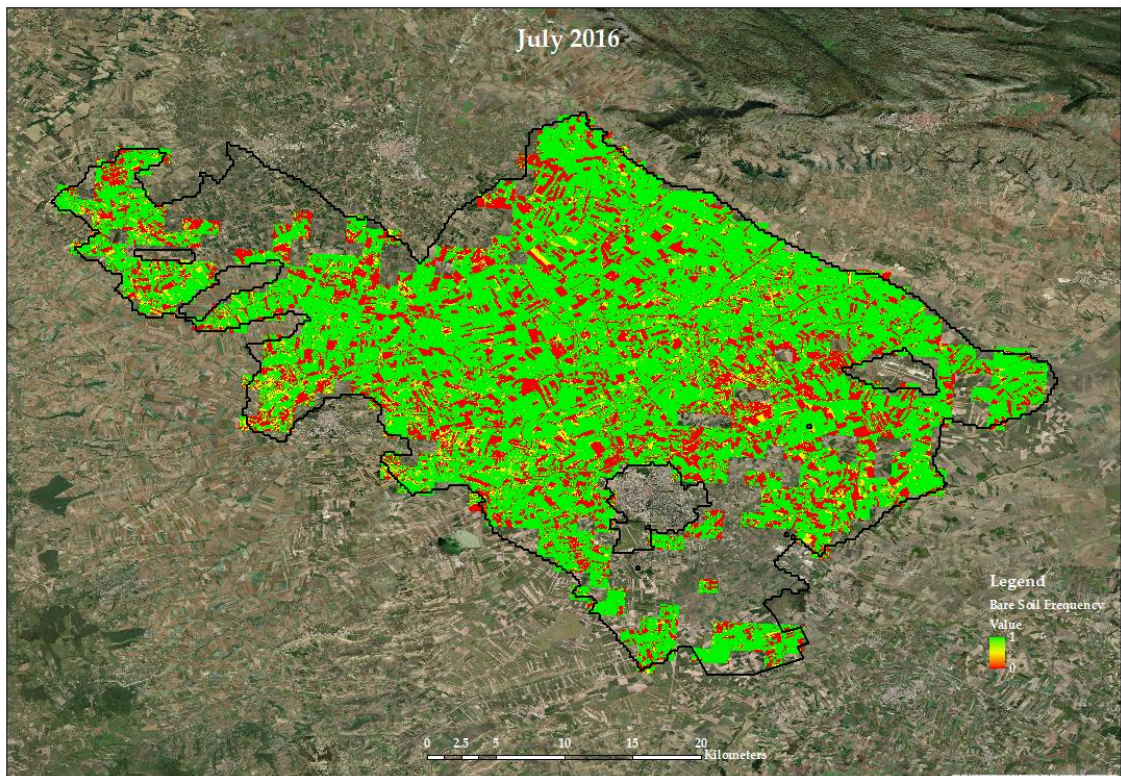

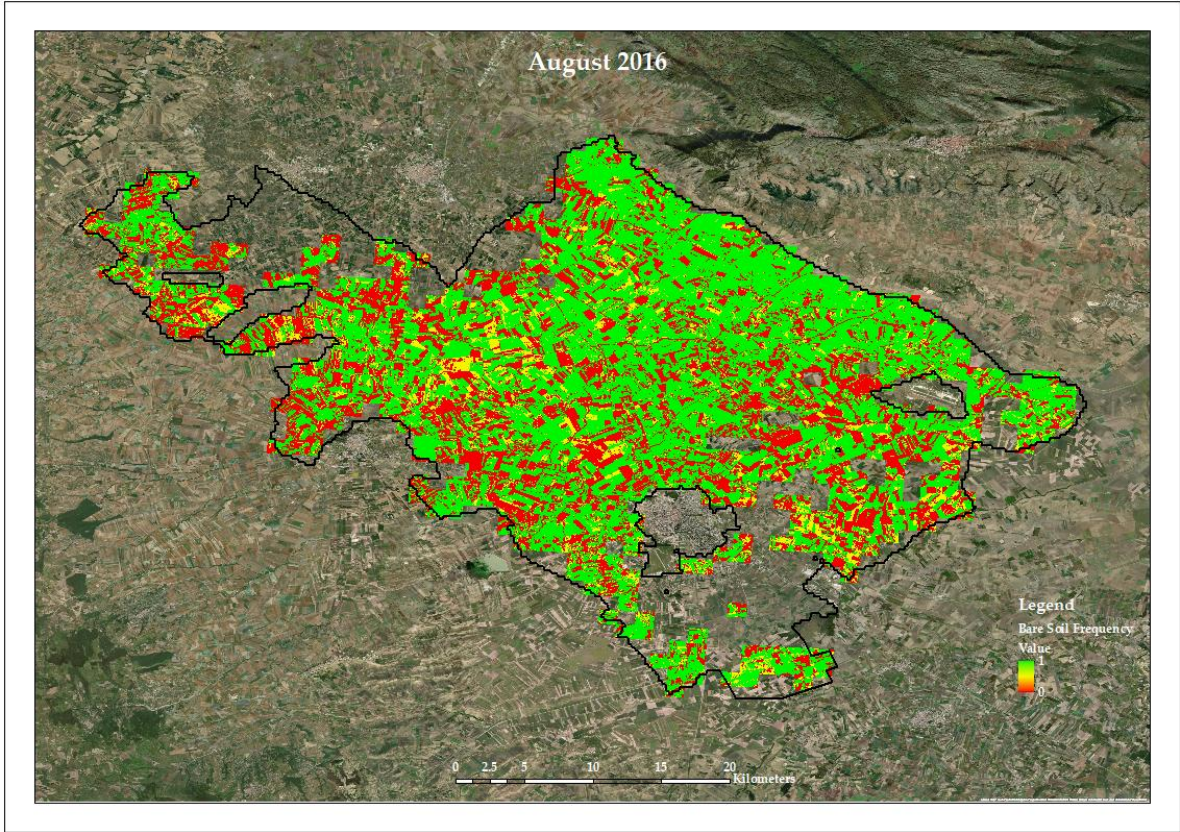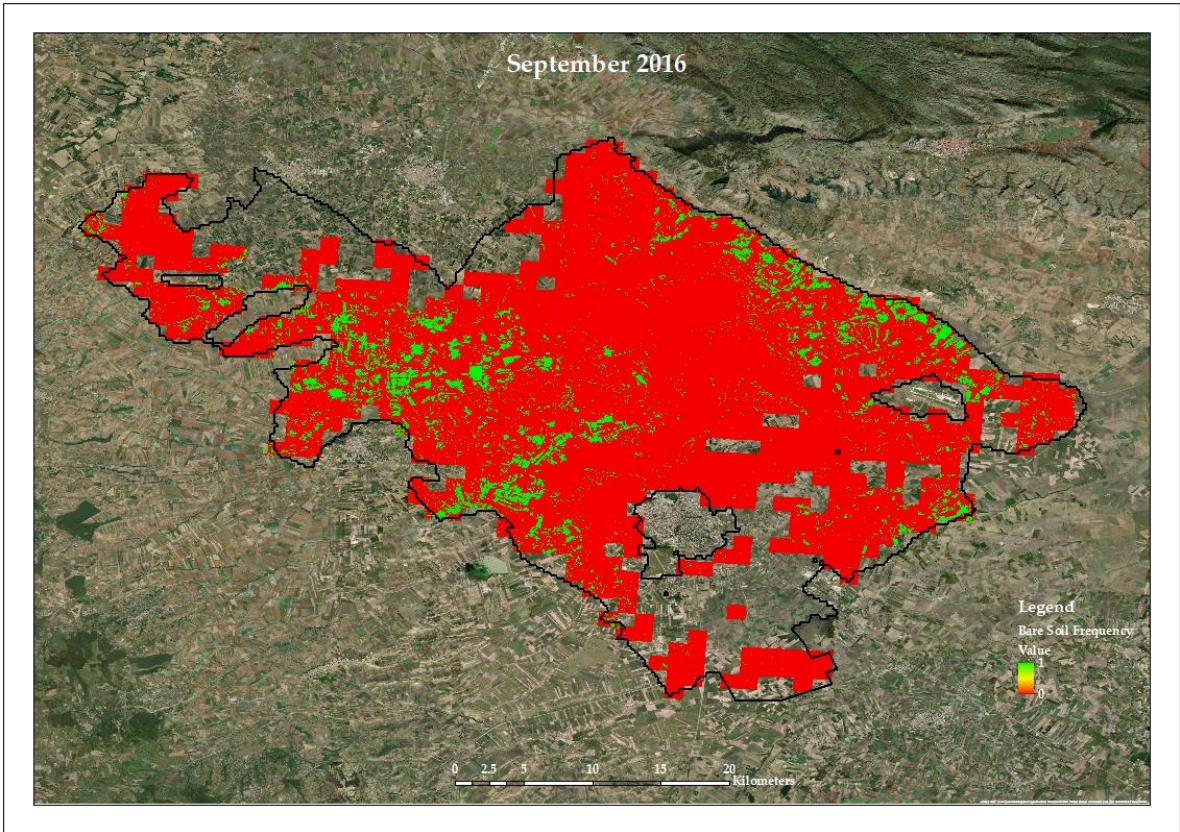

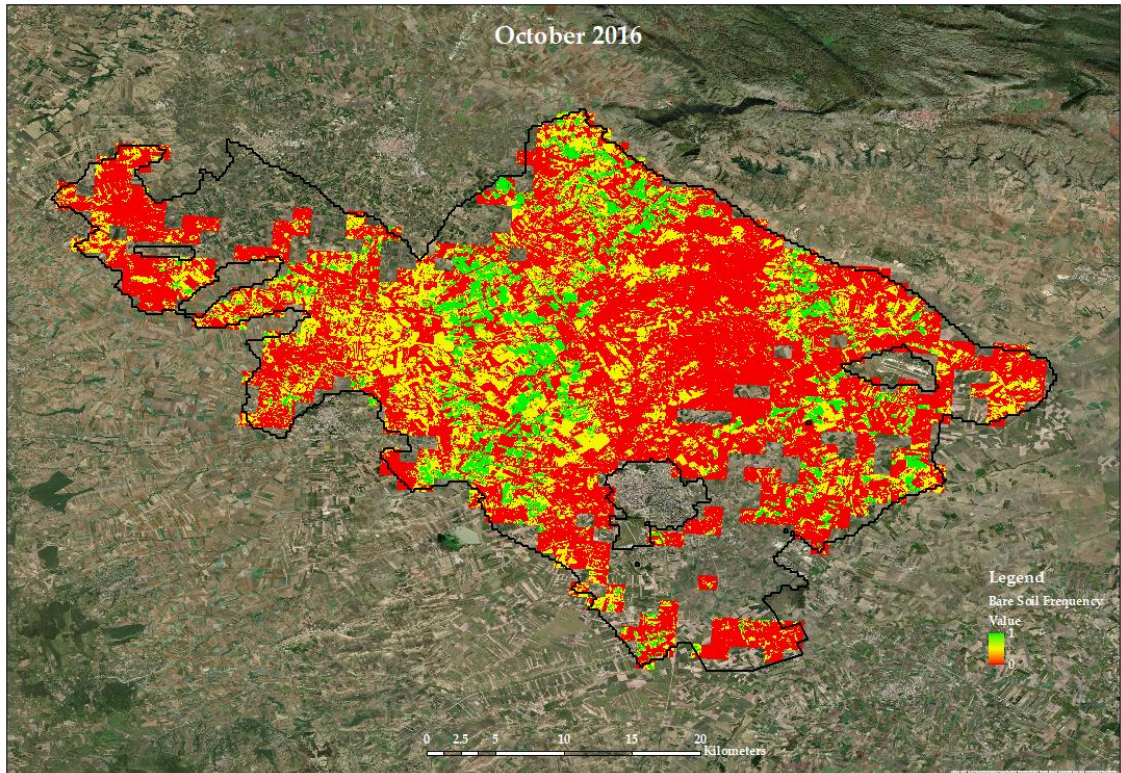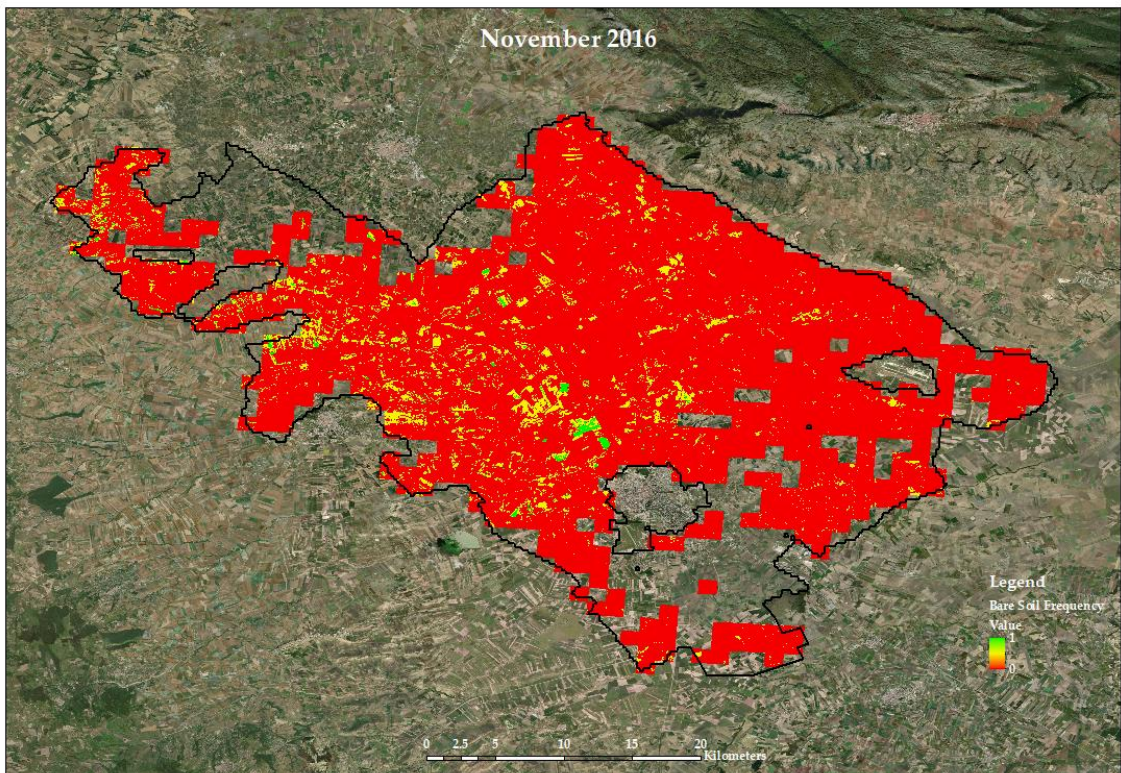

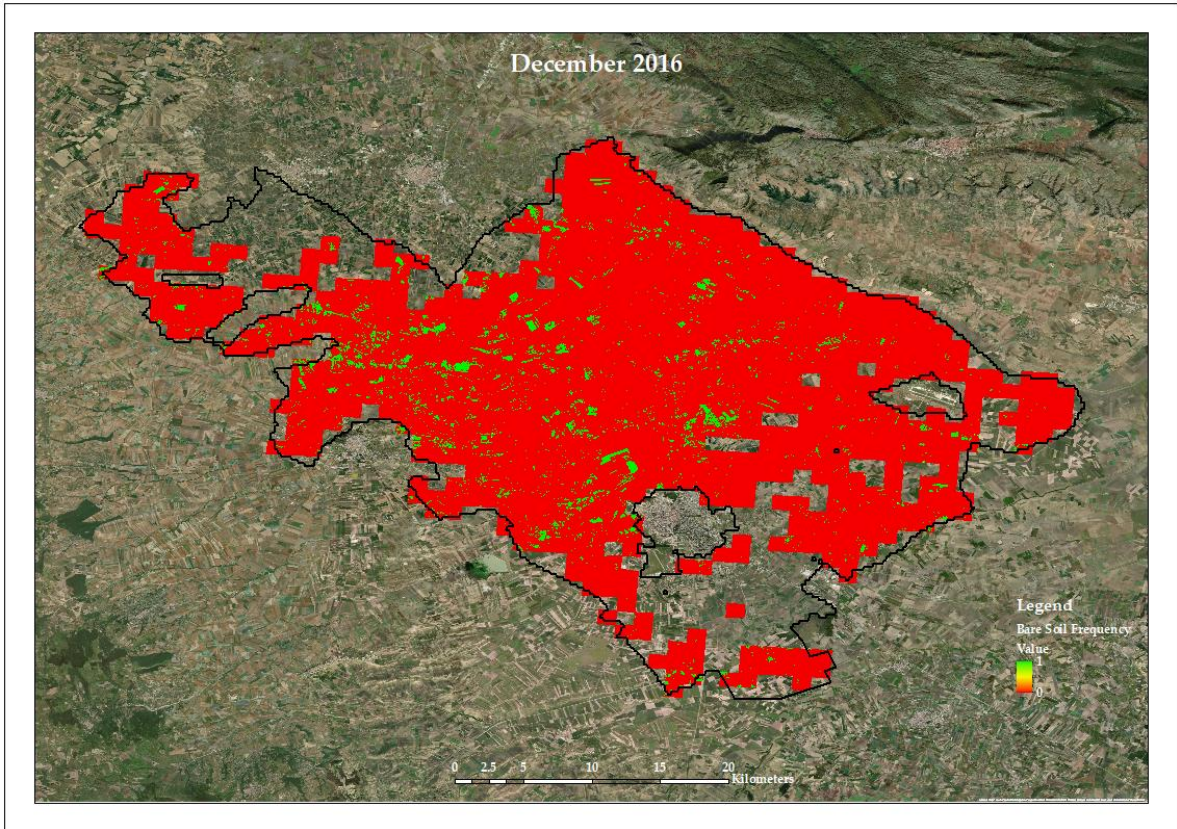

**Figure S9.** Yearly Bare Soil Frequency of the Capitanata region for the agricultural year 2016.

February 2017

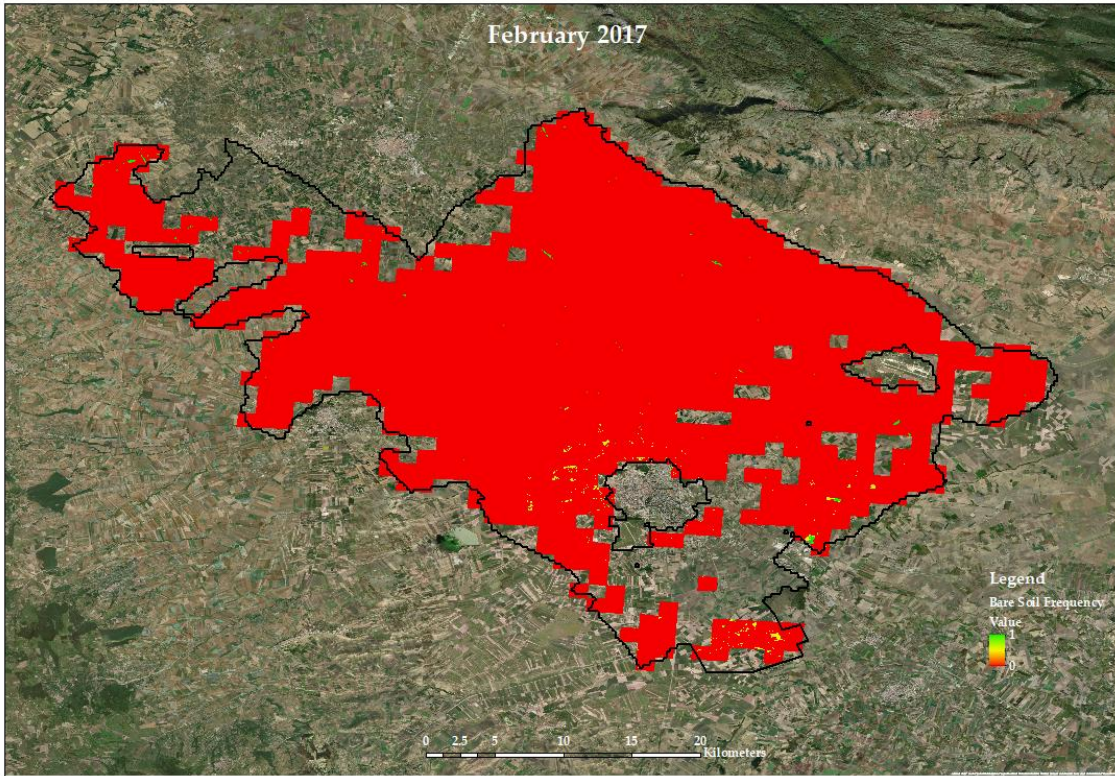

March 2017

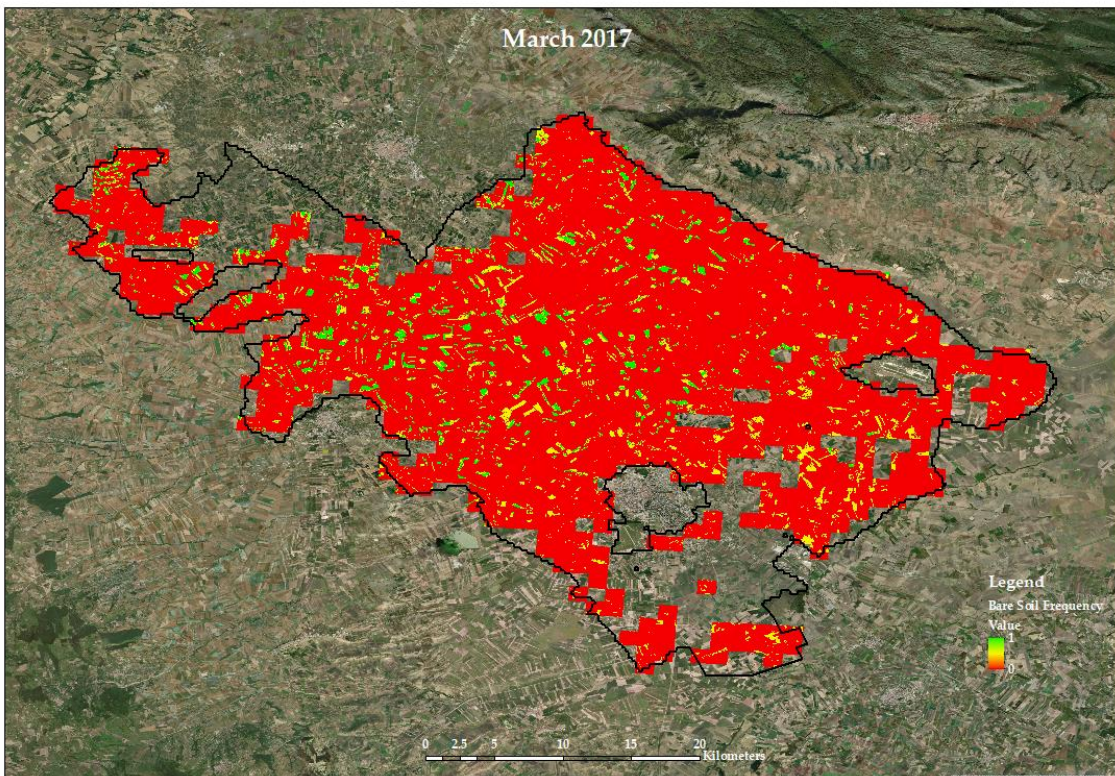



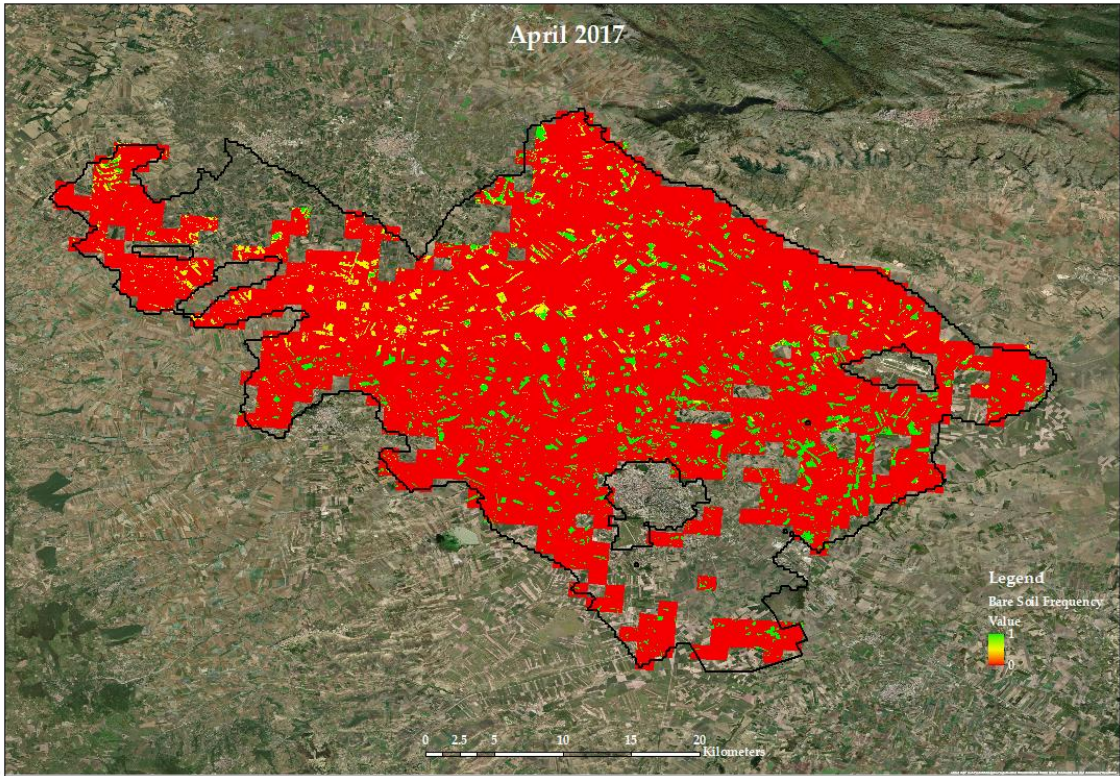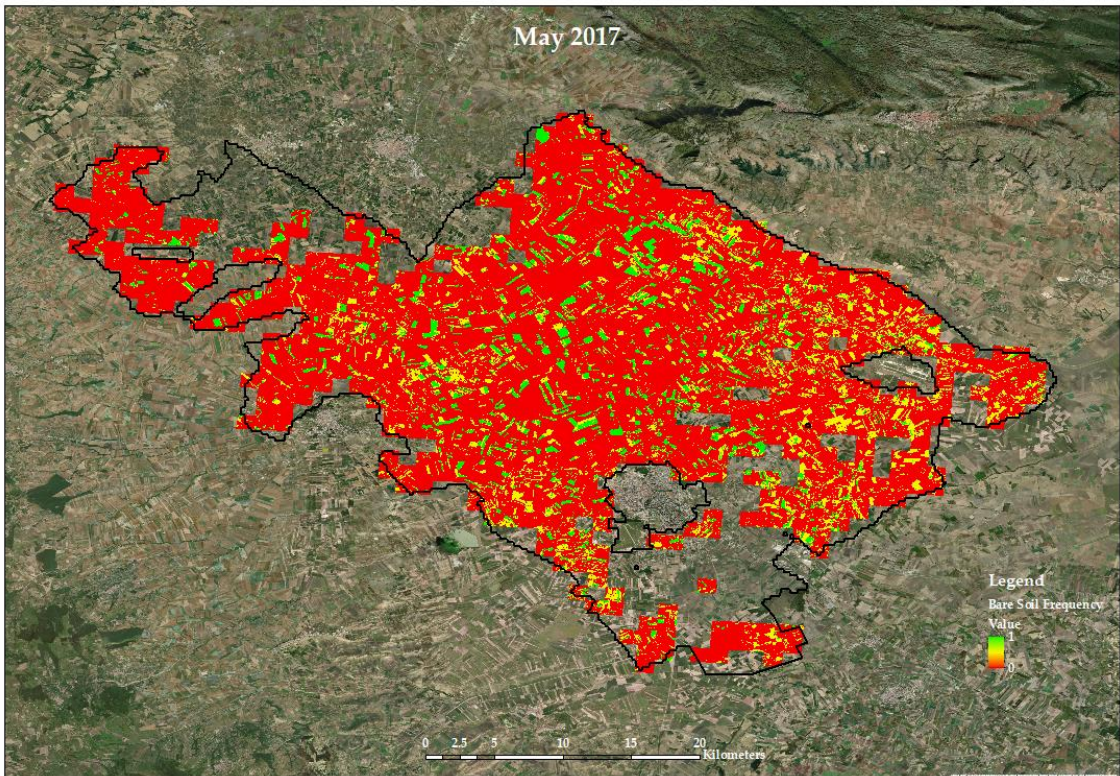

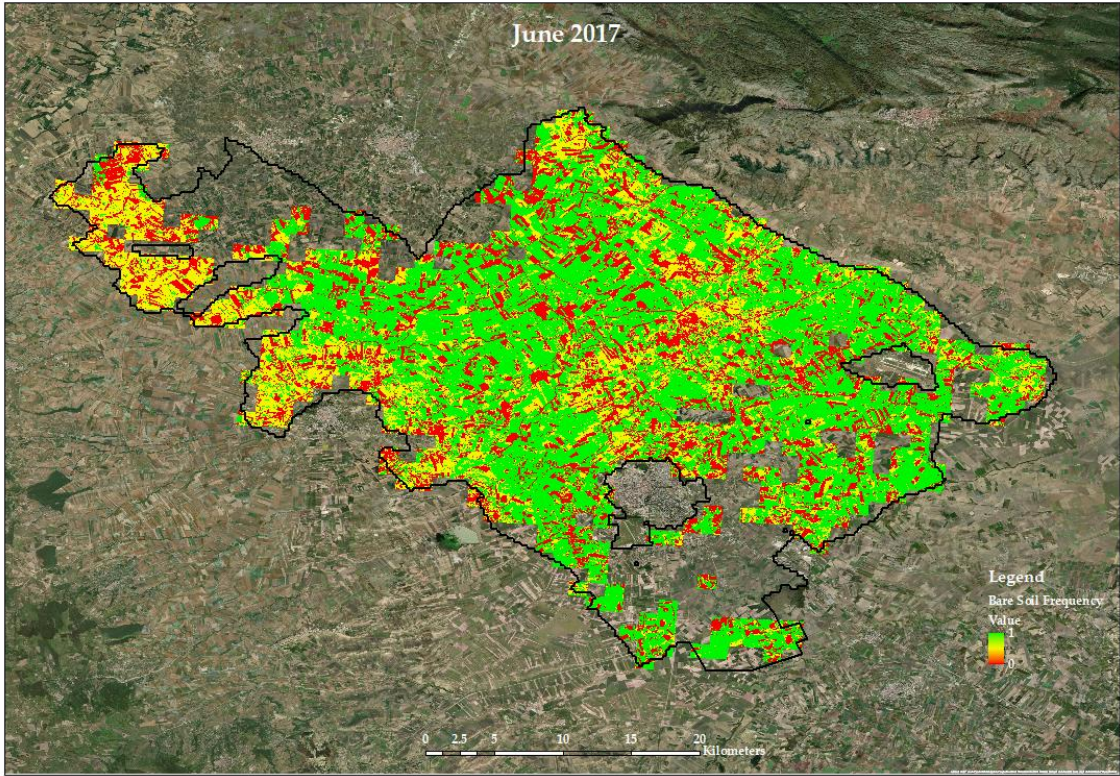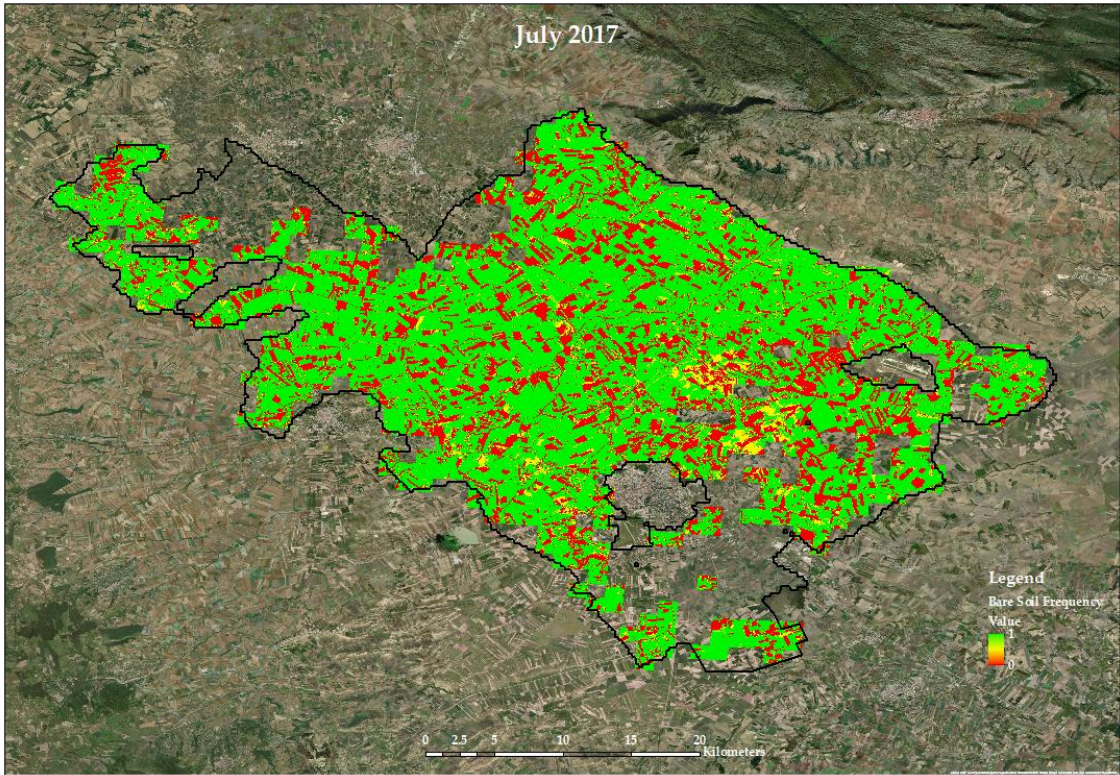

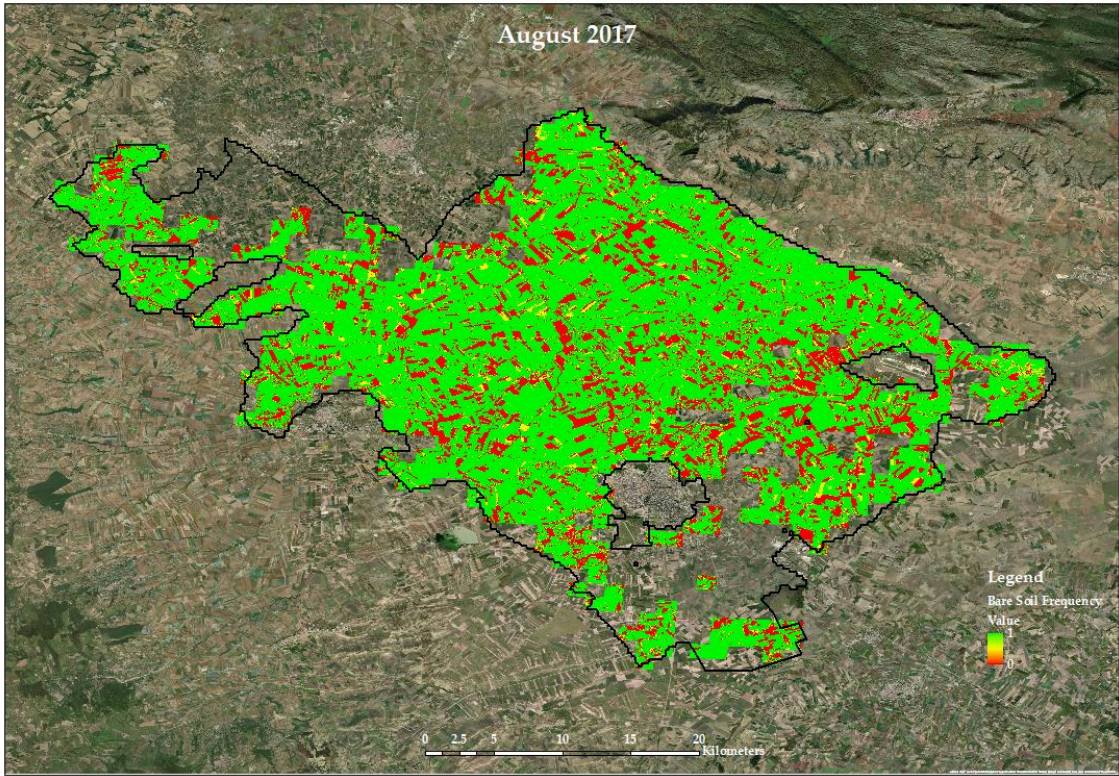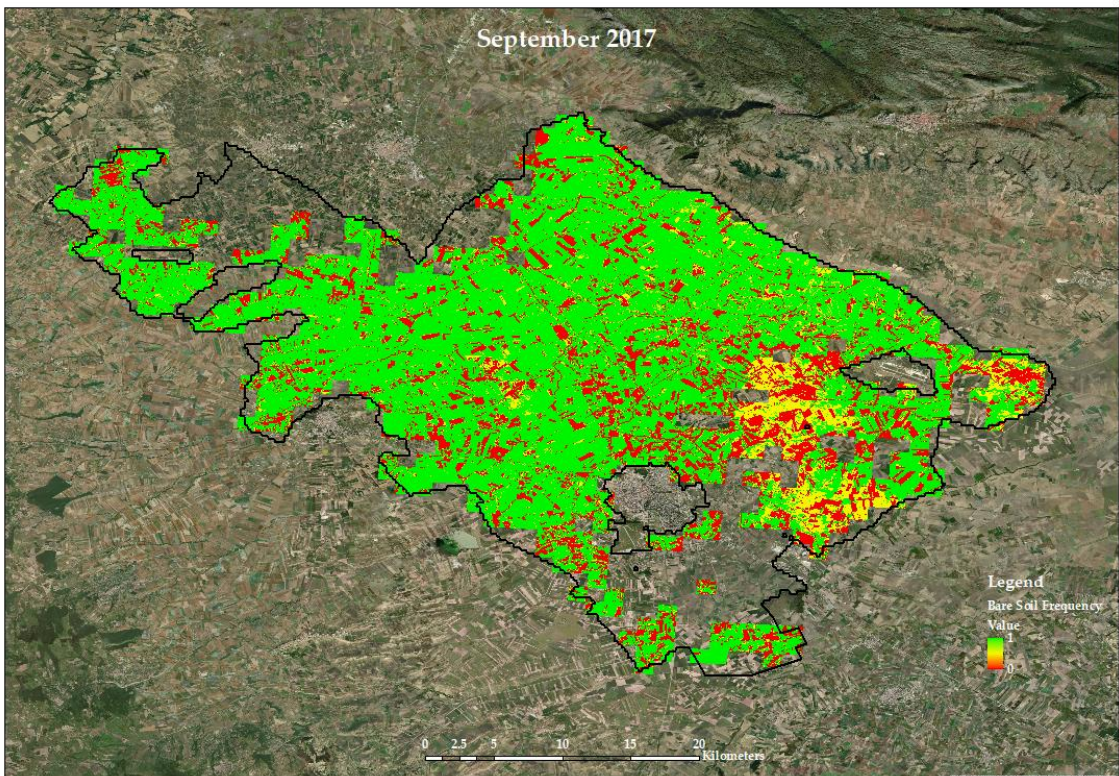

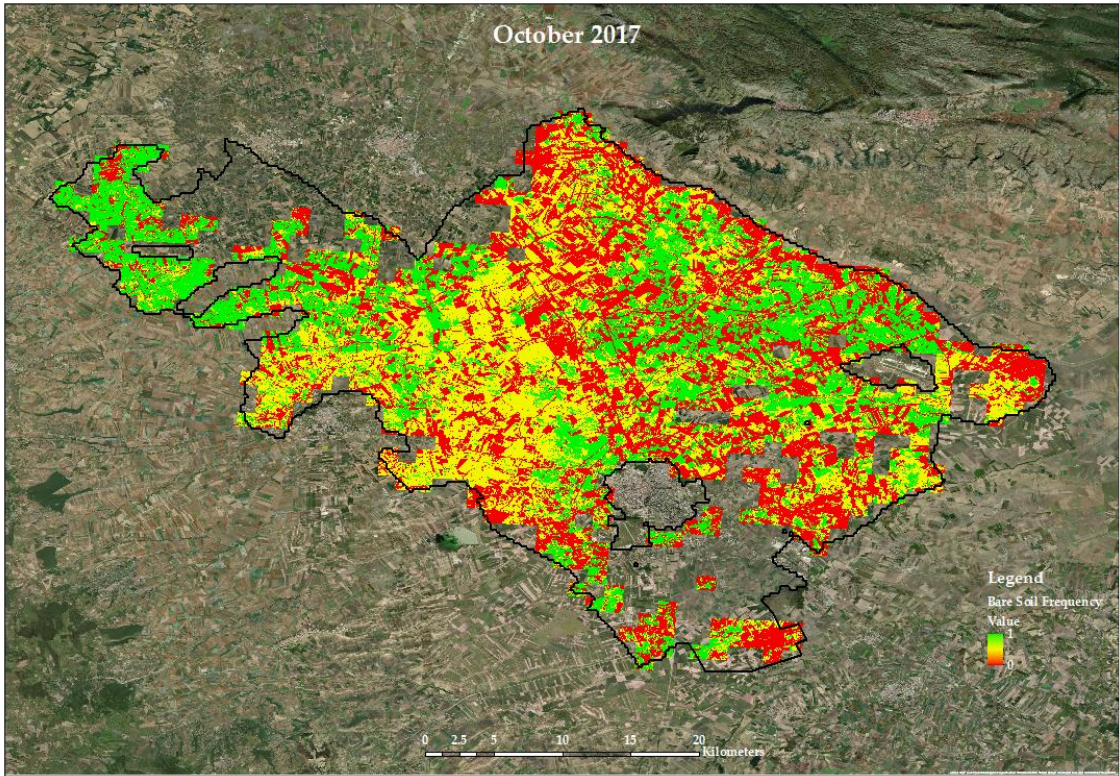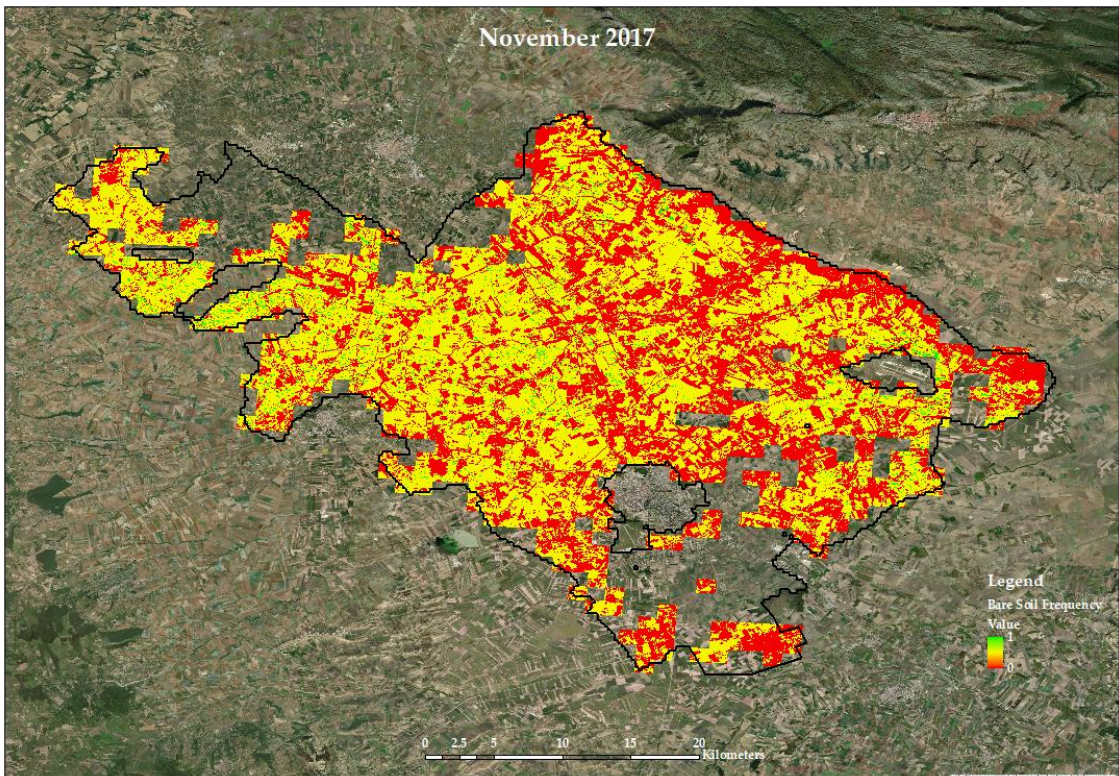

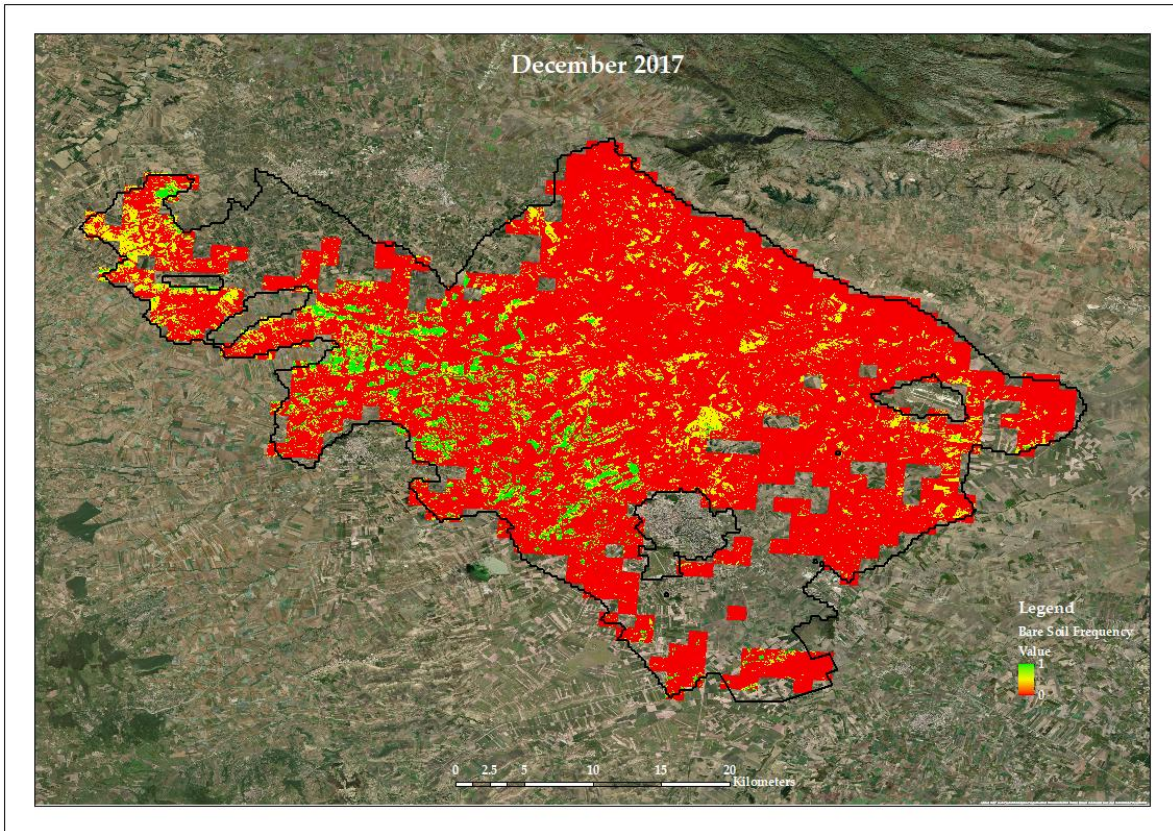

**Figure S10.** Yearly Bare Soil Frequency of the Capitanata region for the agricultural year 2017.

January 2018

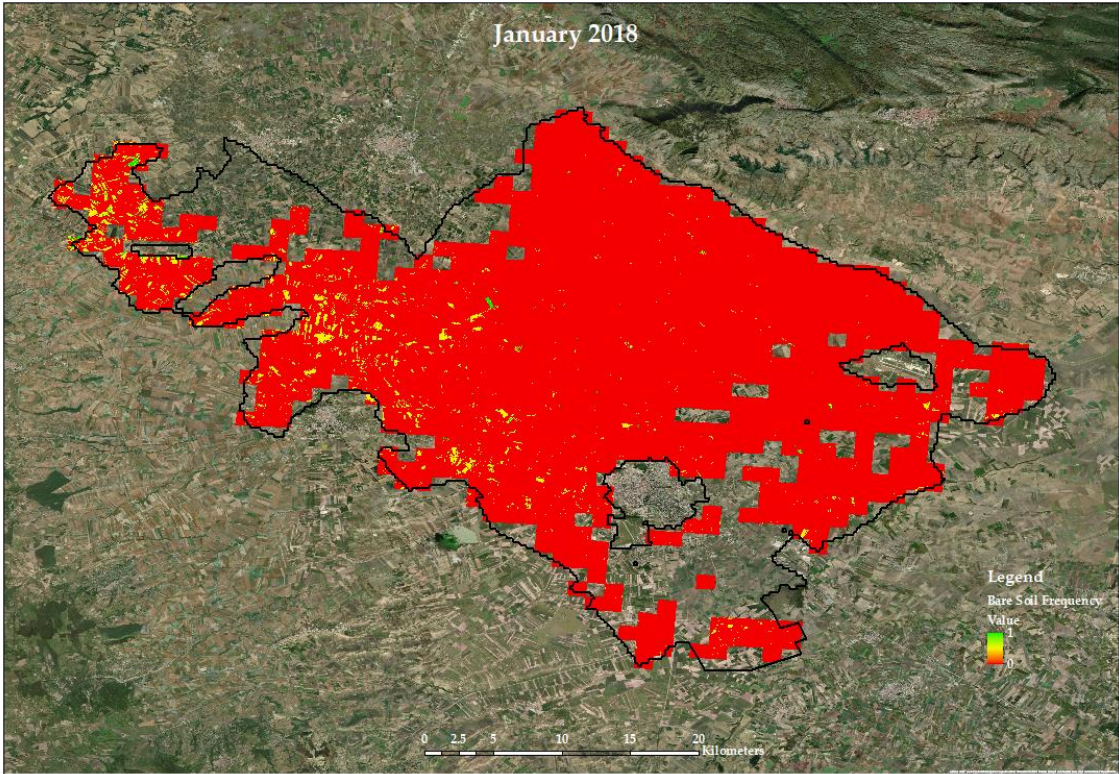

February 2018

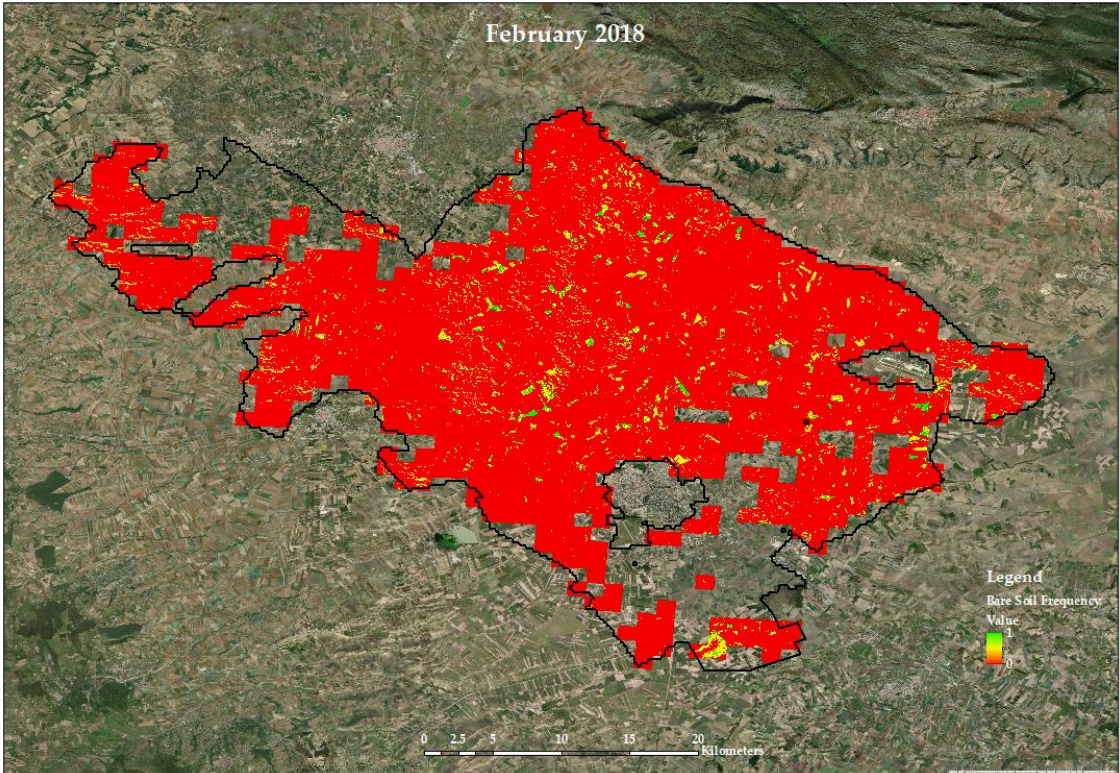

March 2018

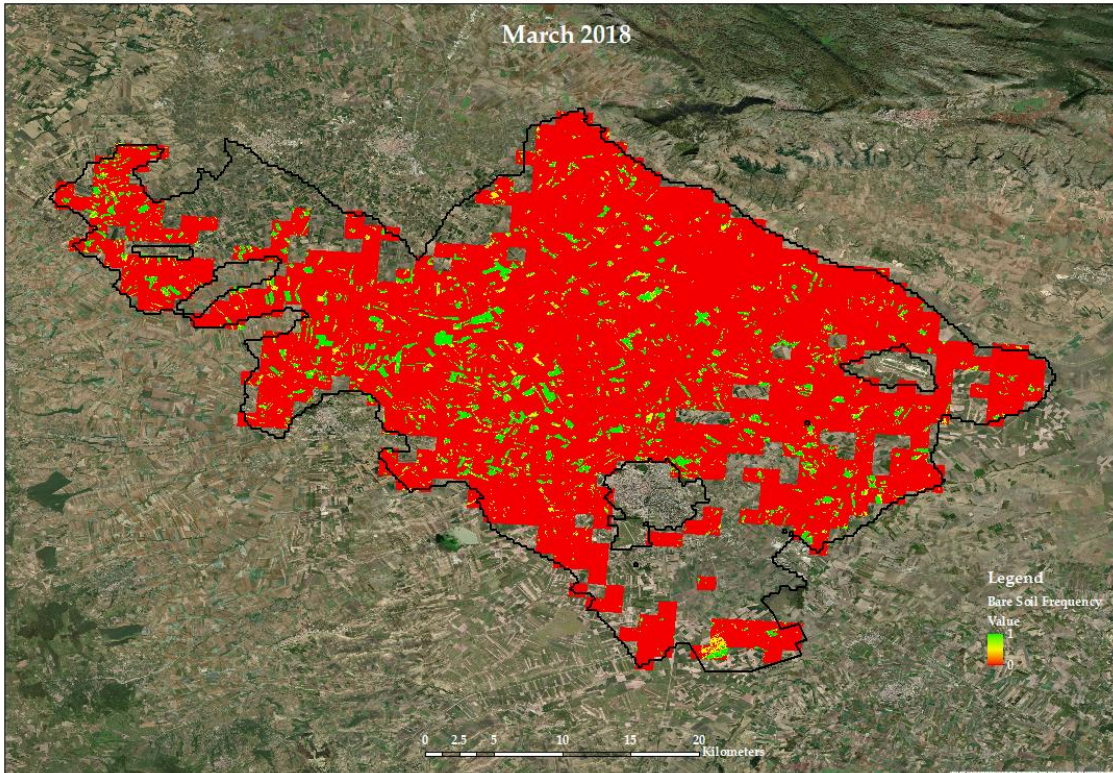

April 2018

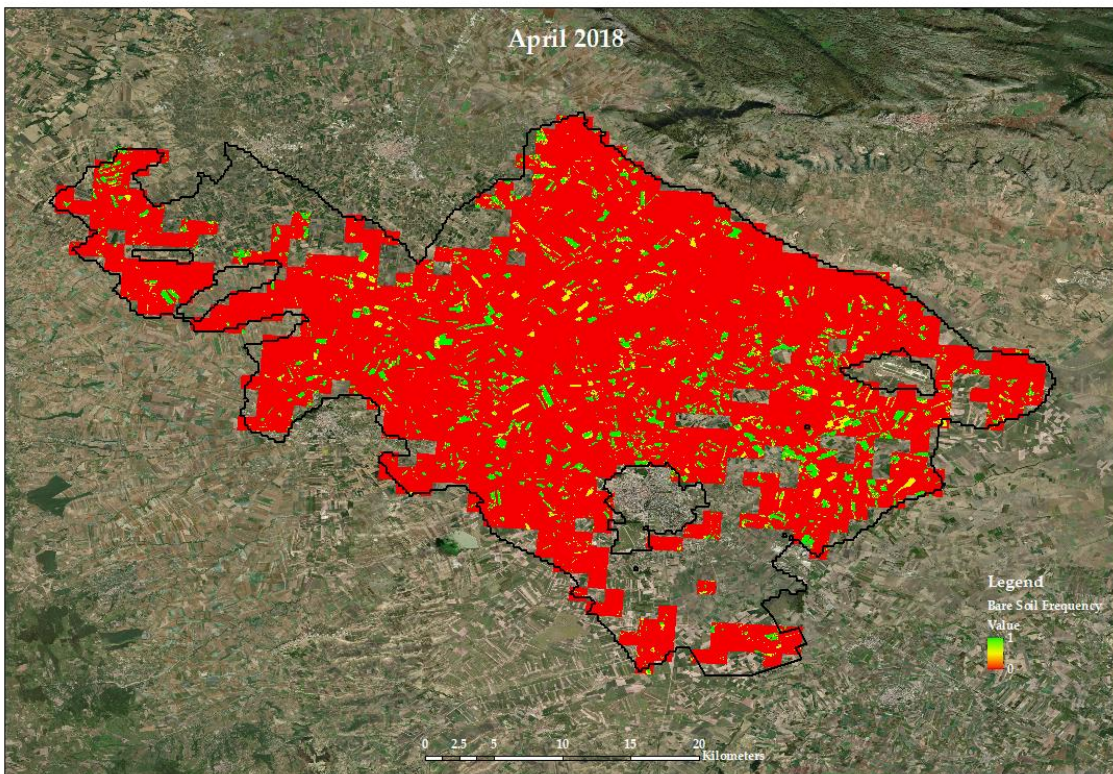

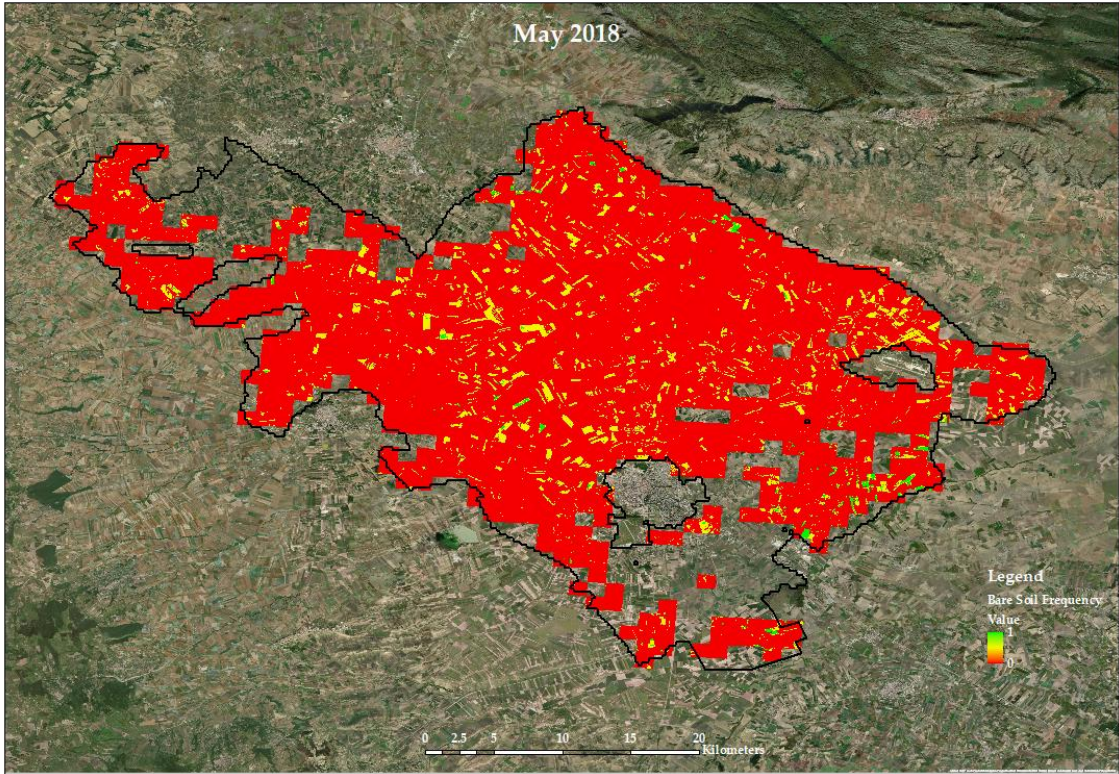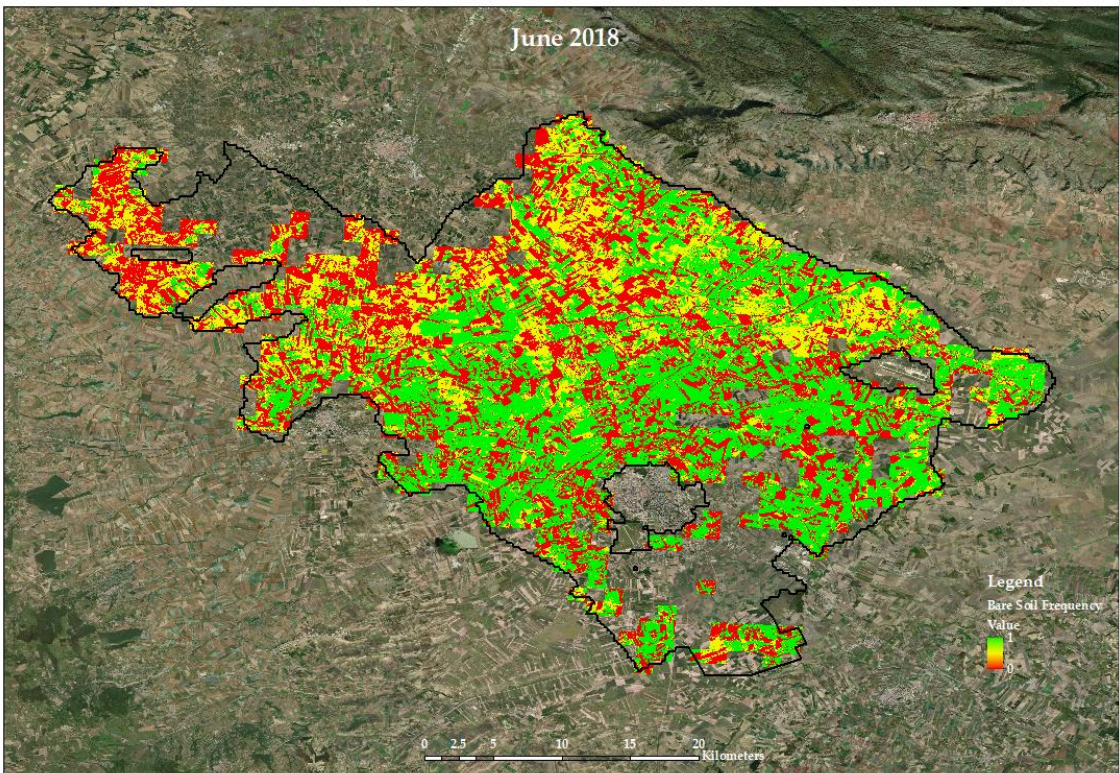



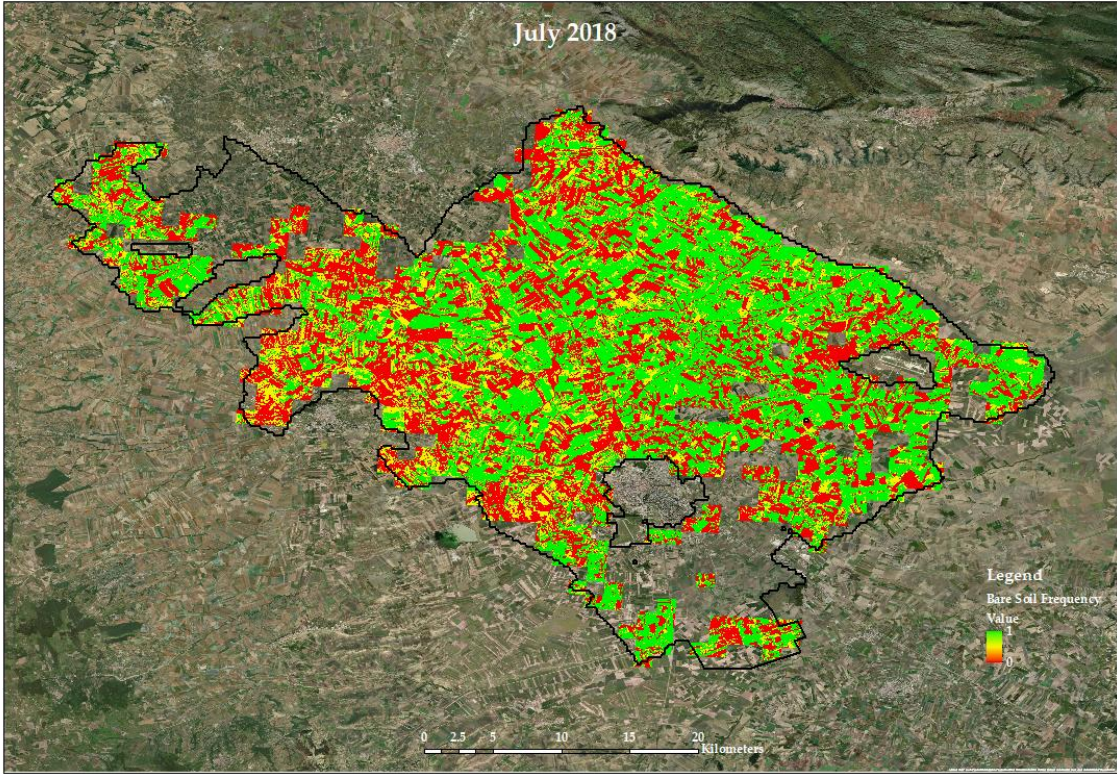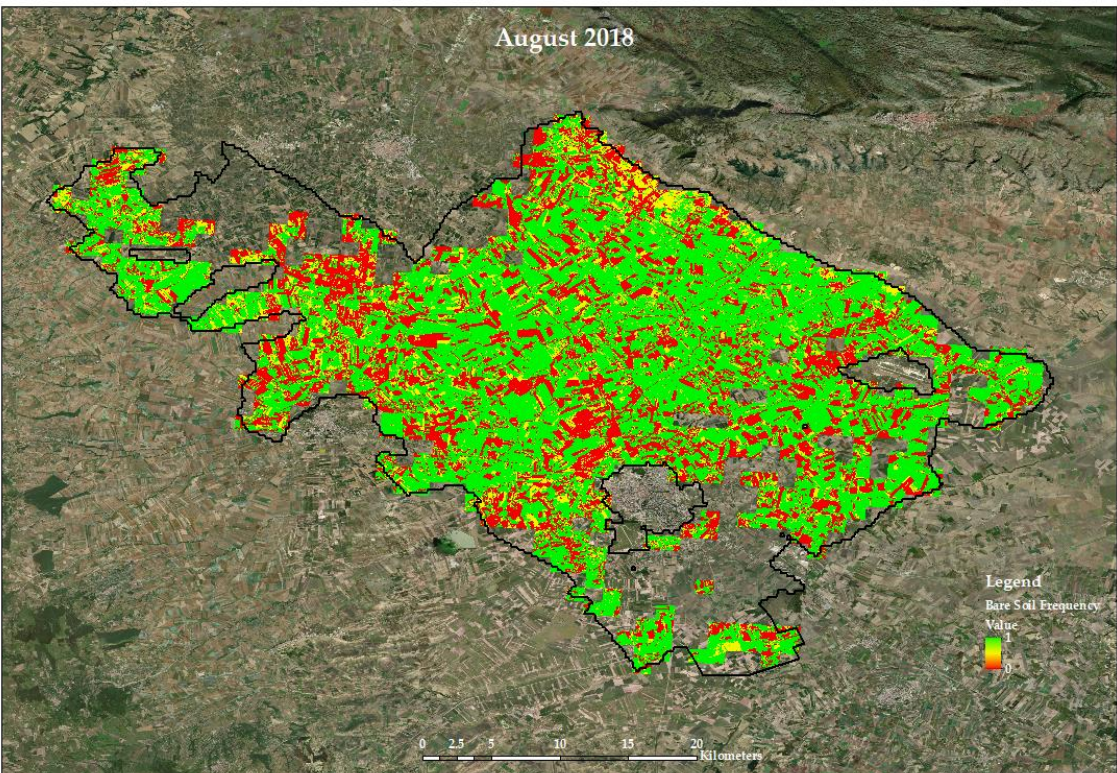

September 2018

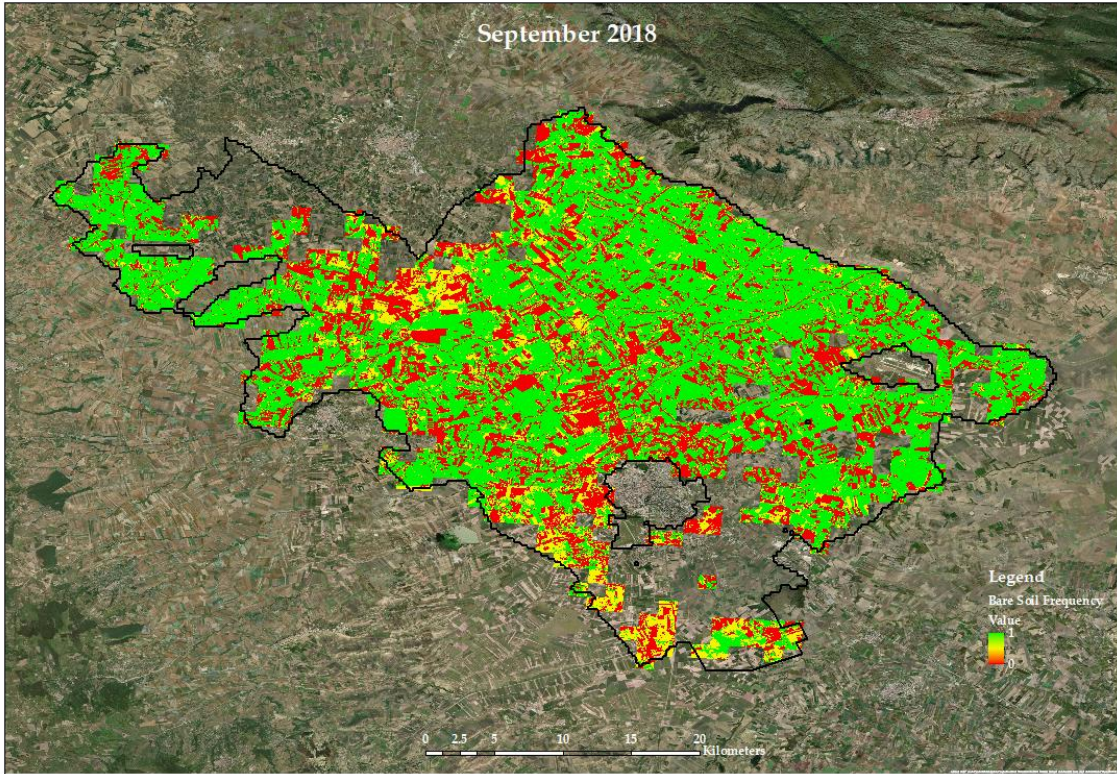

October 2018

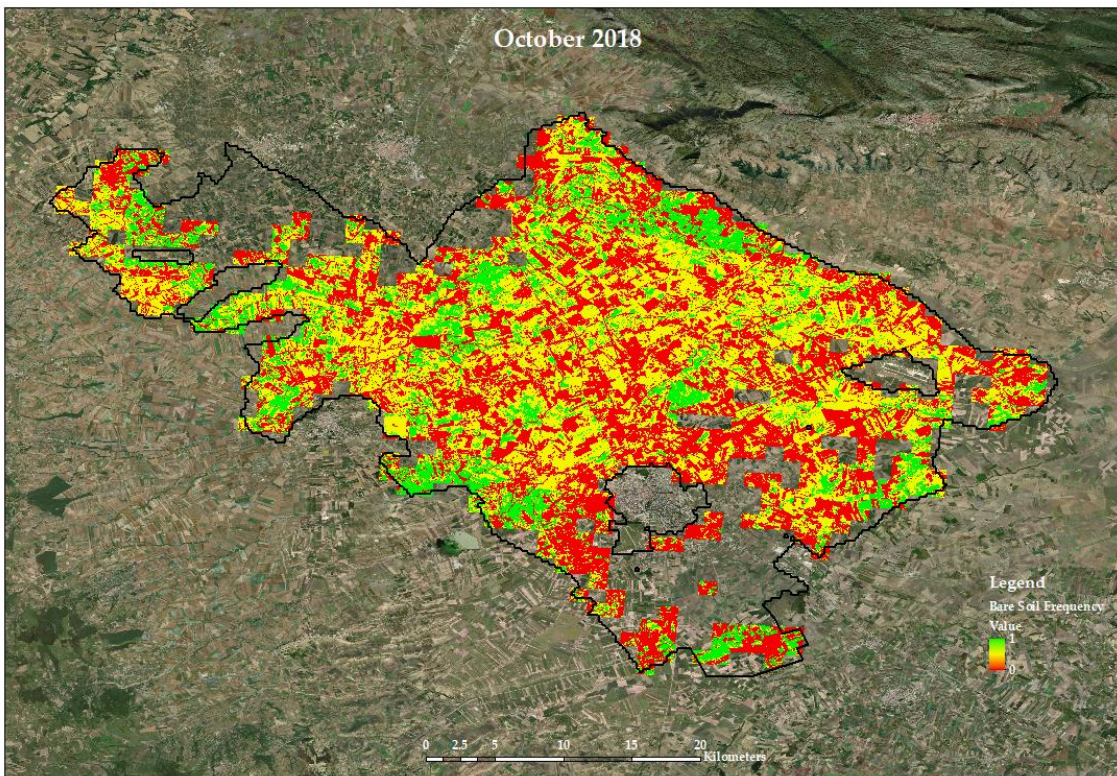

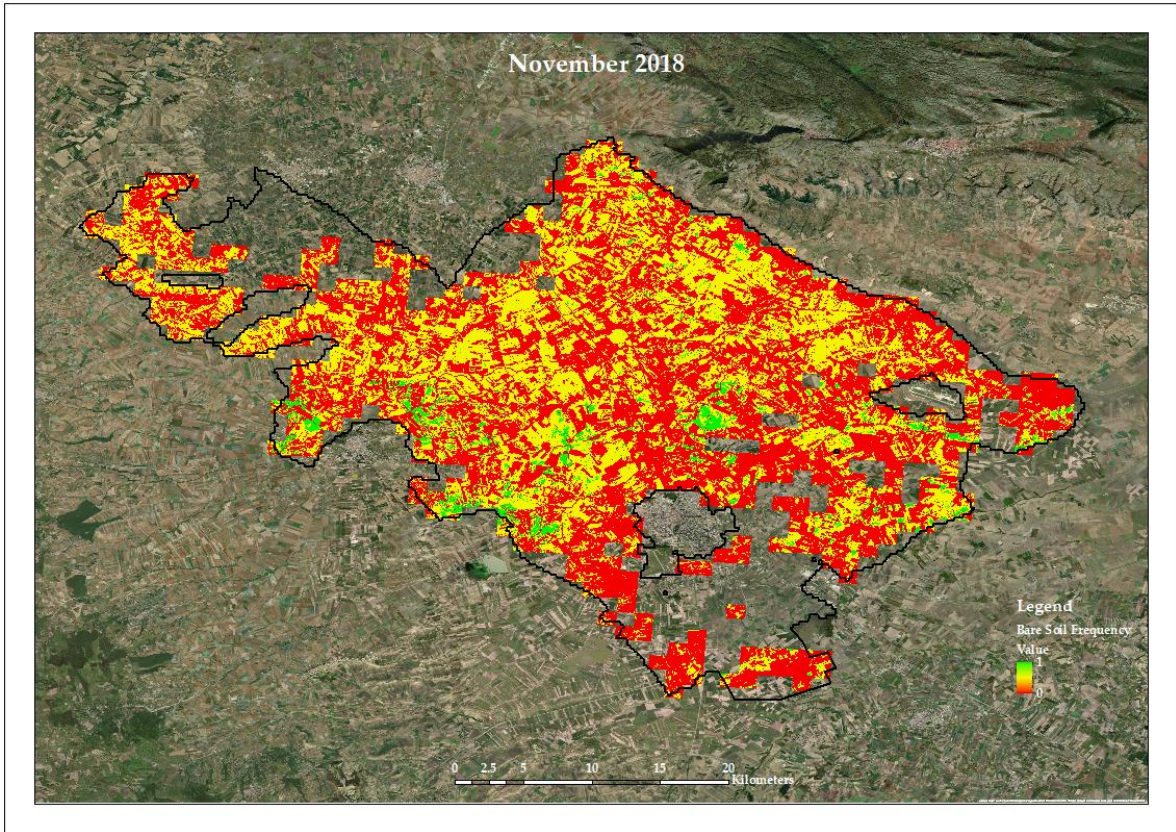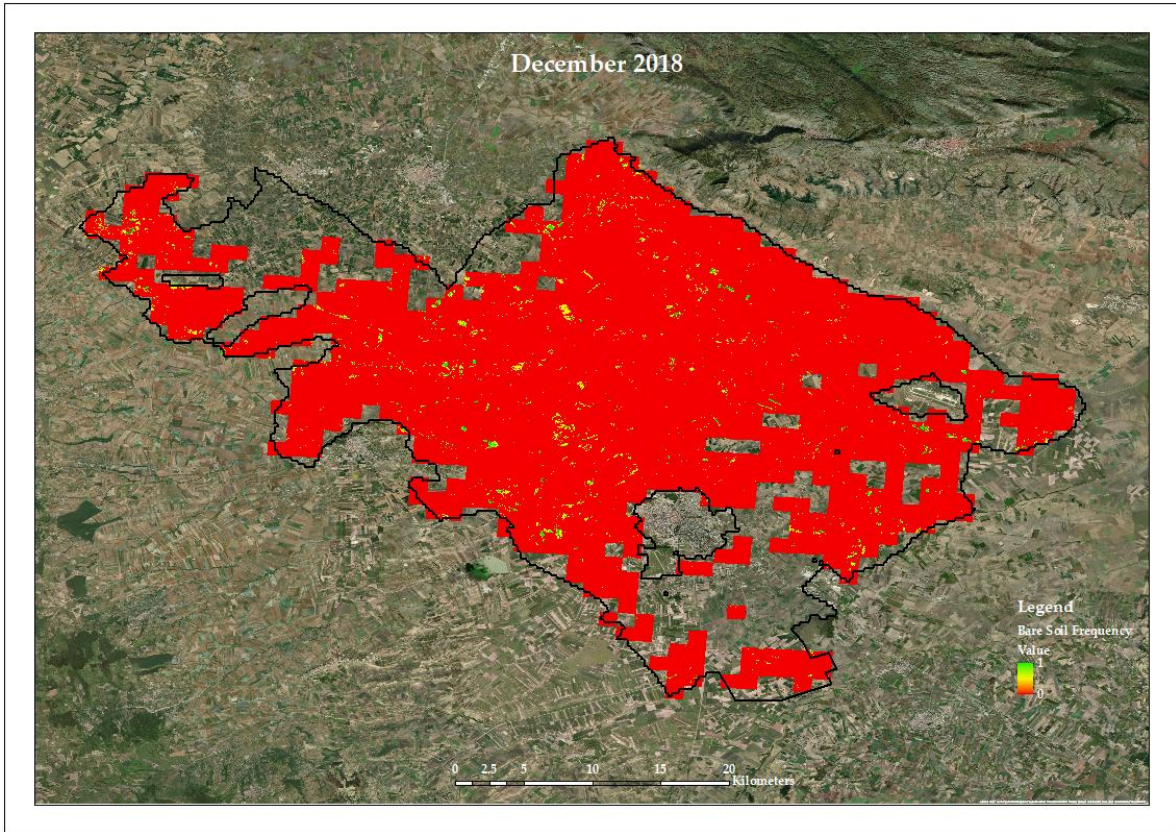

**Figure S11.** Yearly Bare Soil Frequency of the Capitanata region for the agricultural year 2018.

January 2019

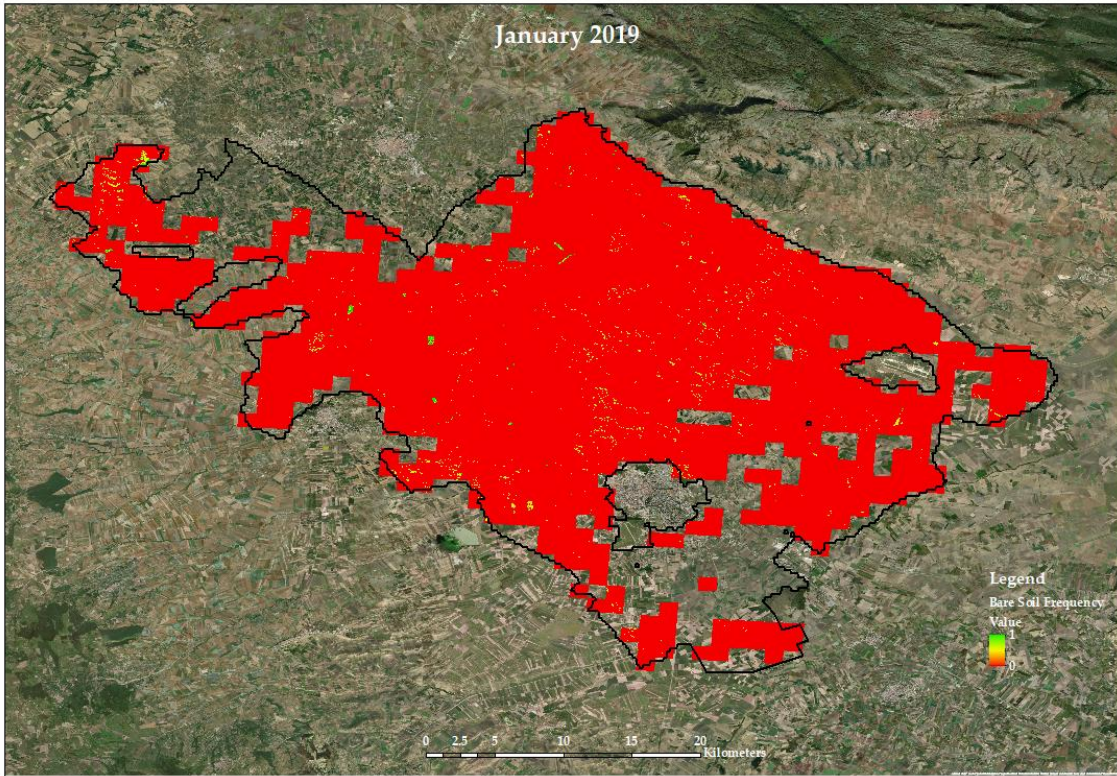

February 2019

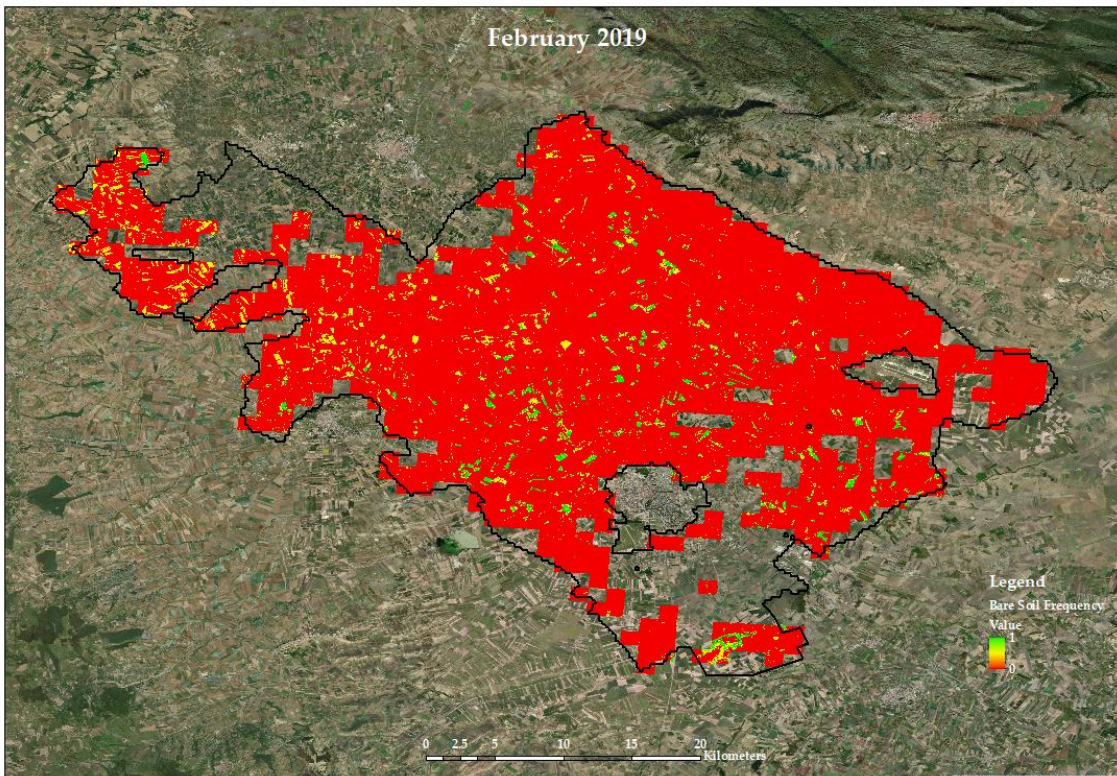

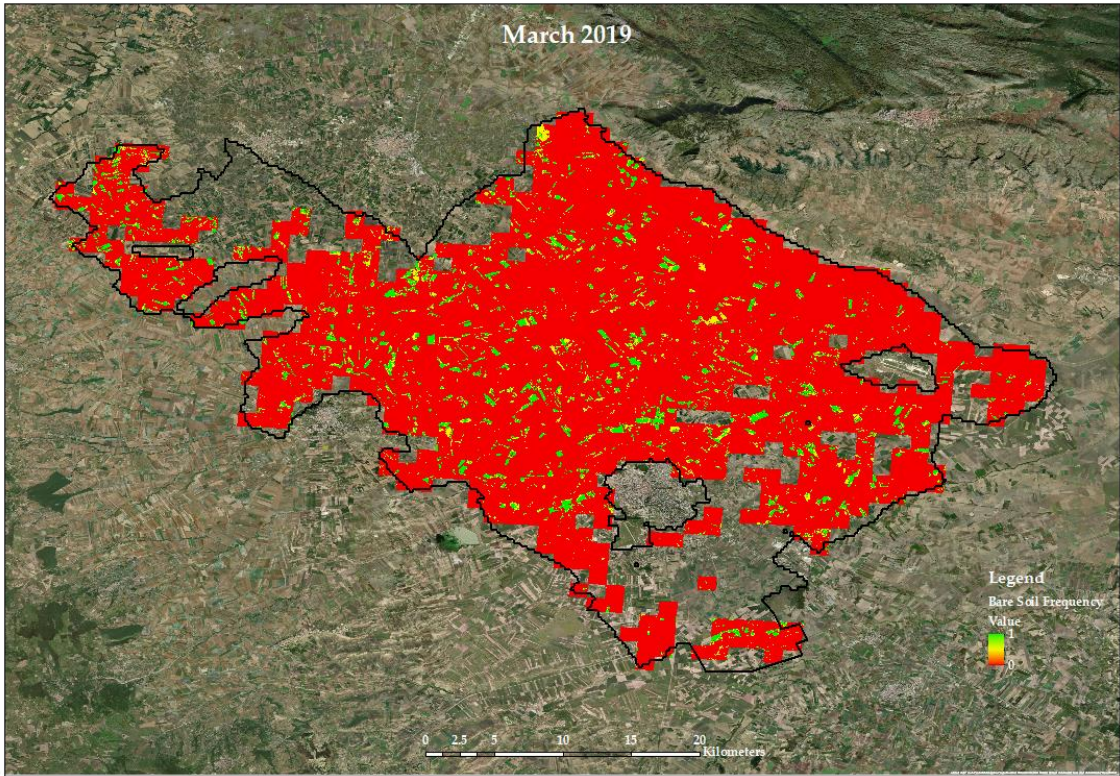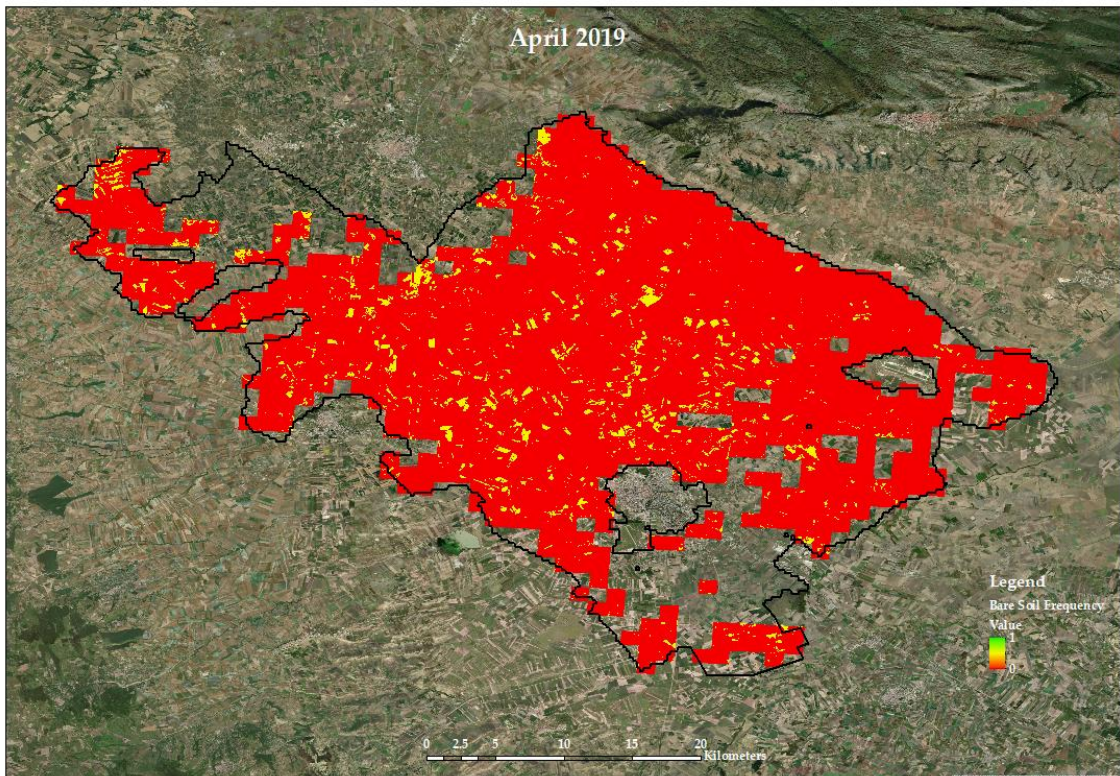

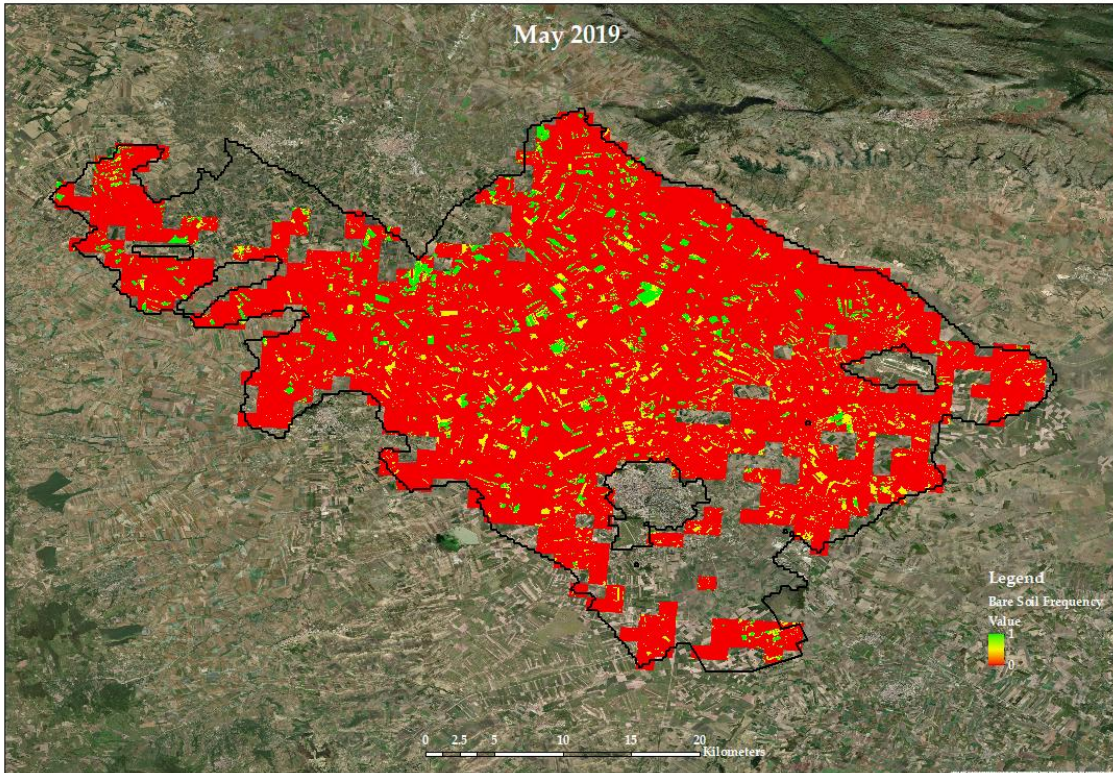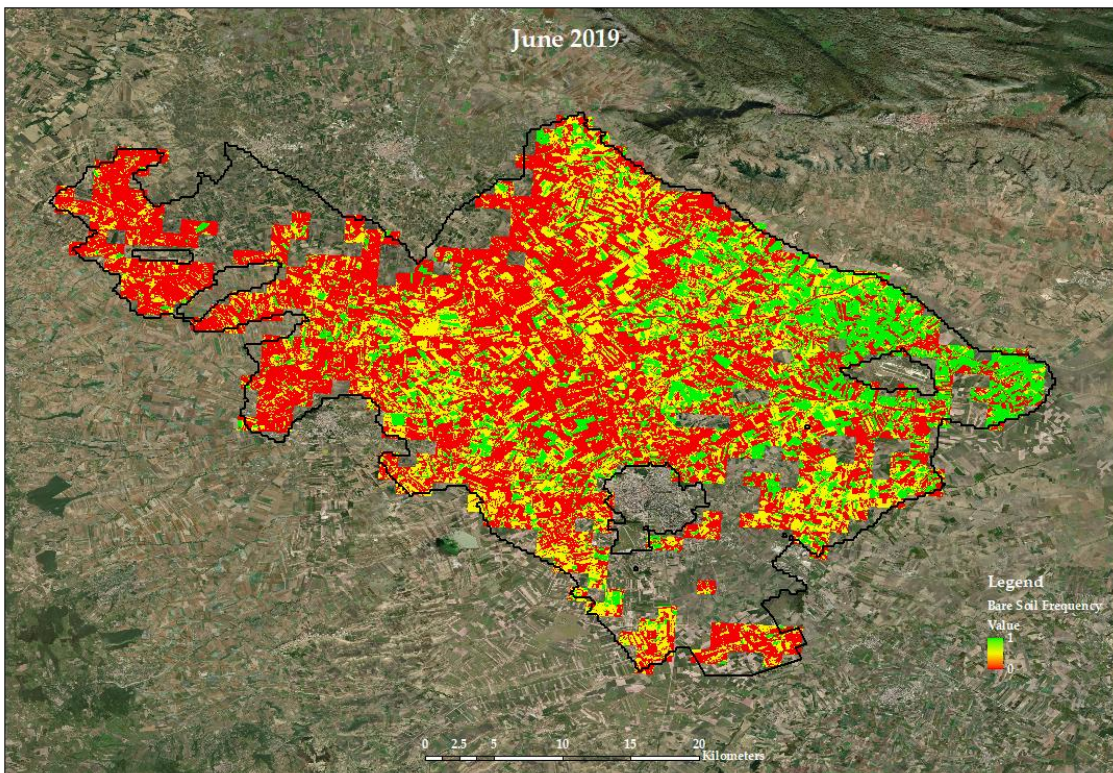

July 2019

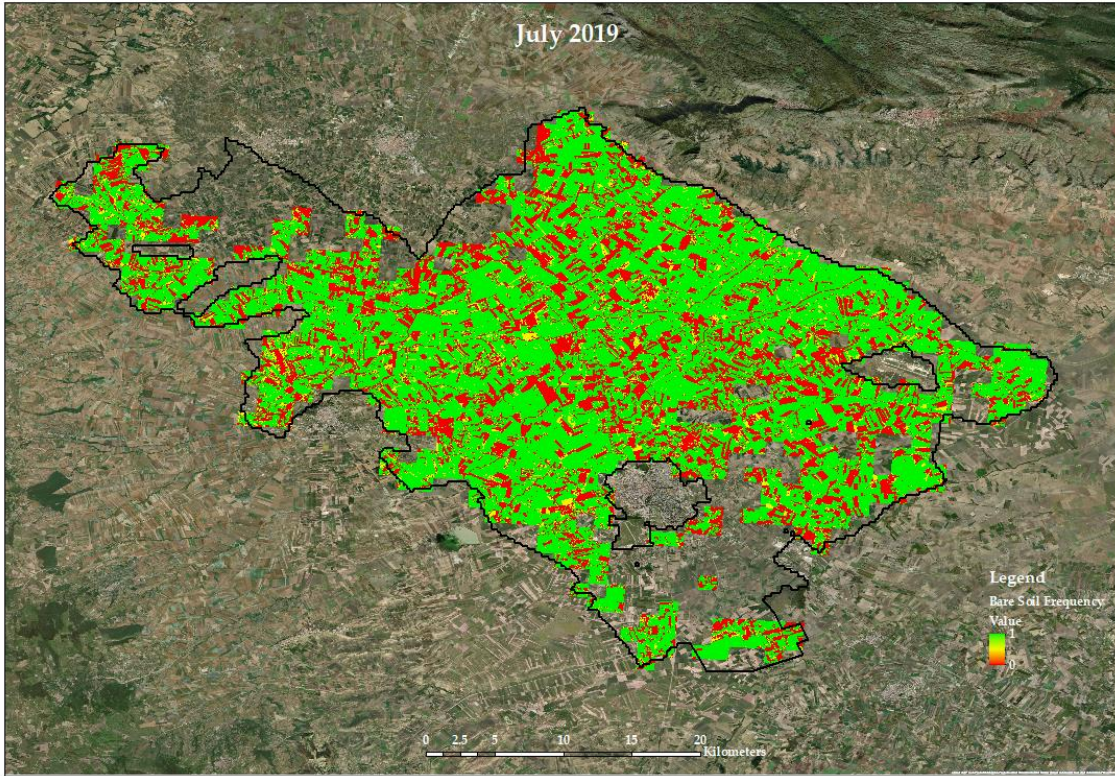

August 2019

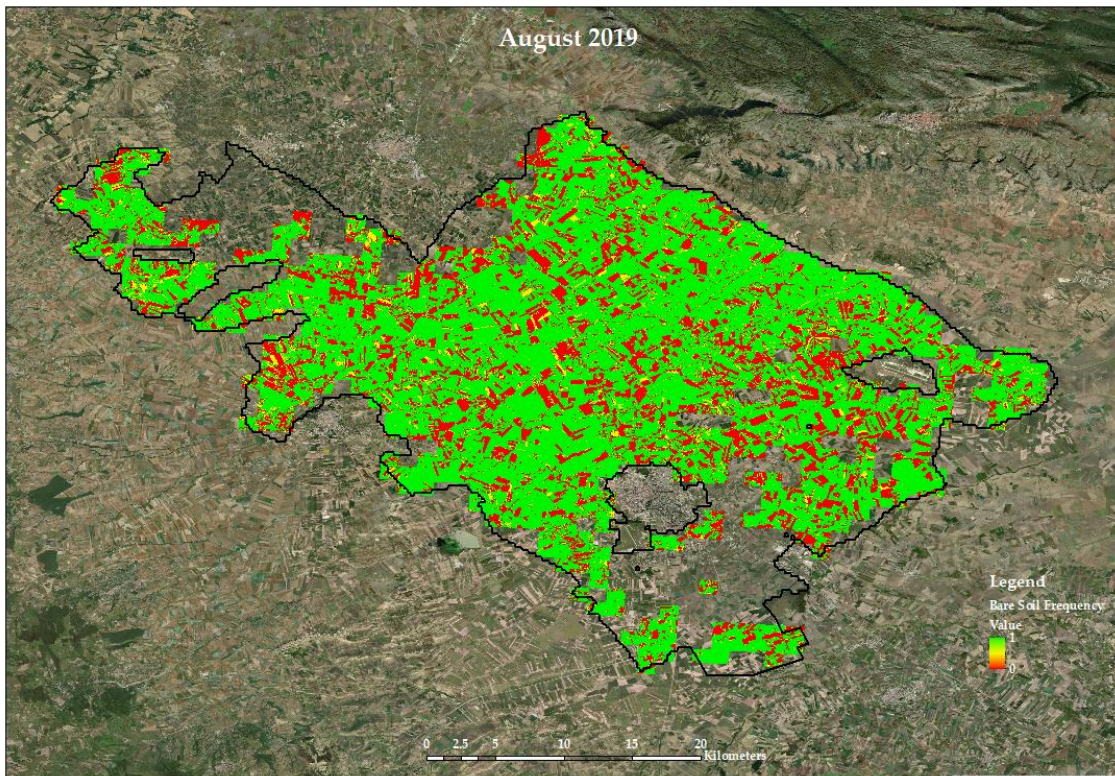

September 2019

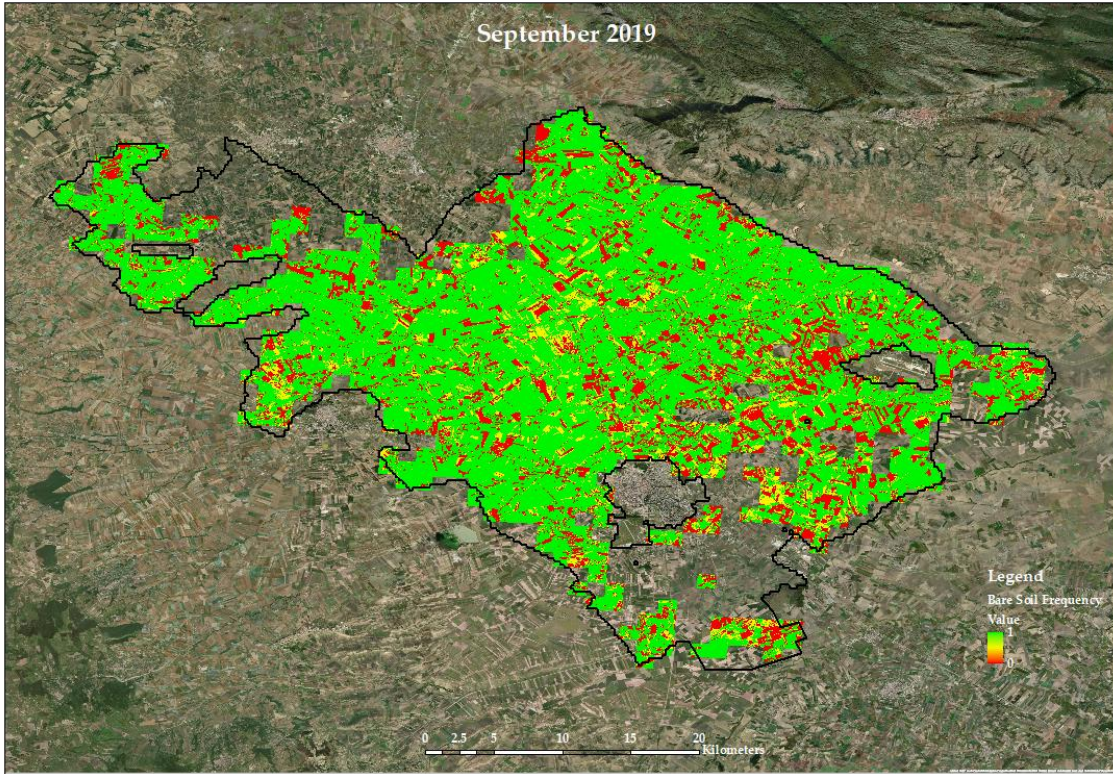

October 2019

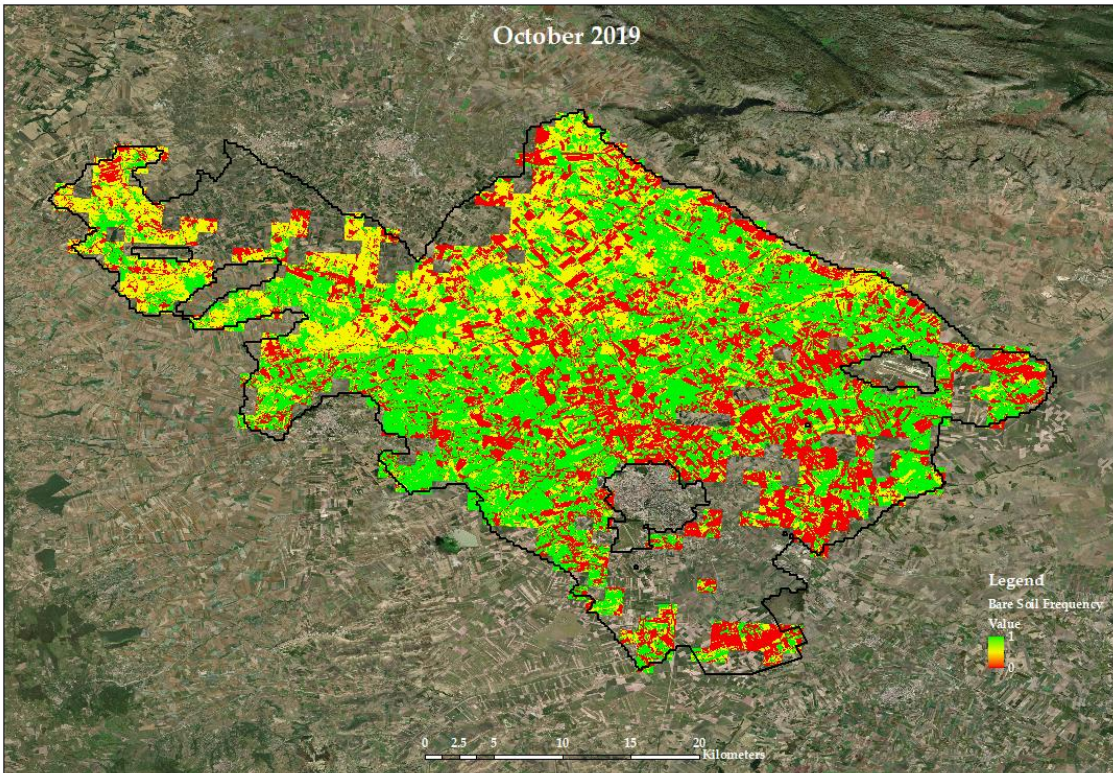



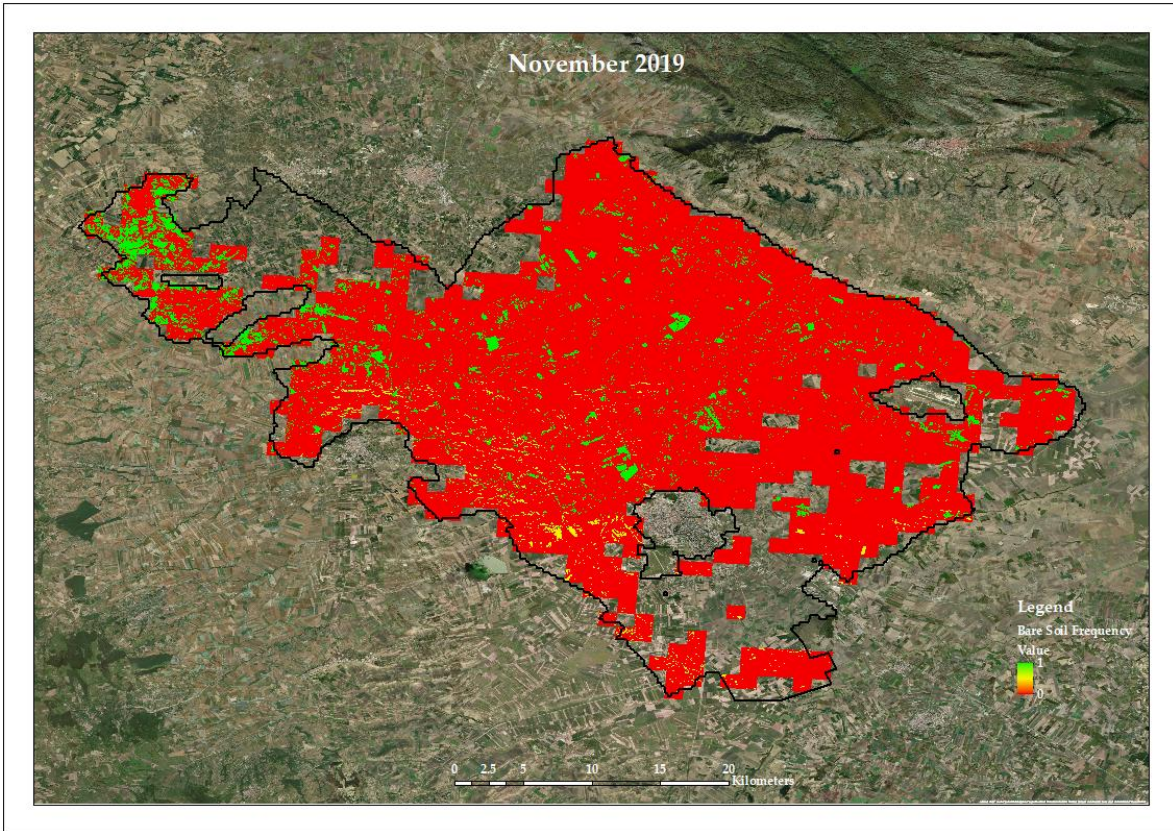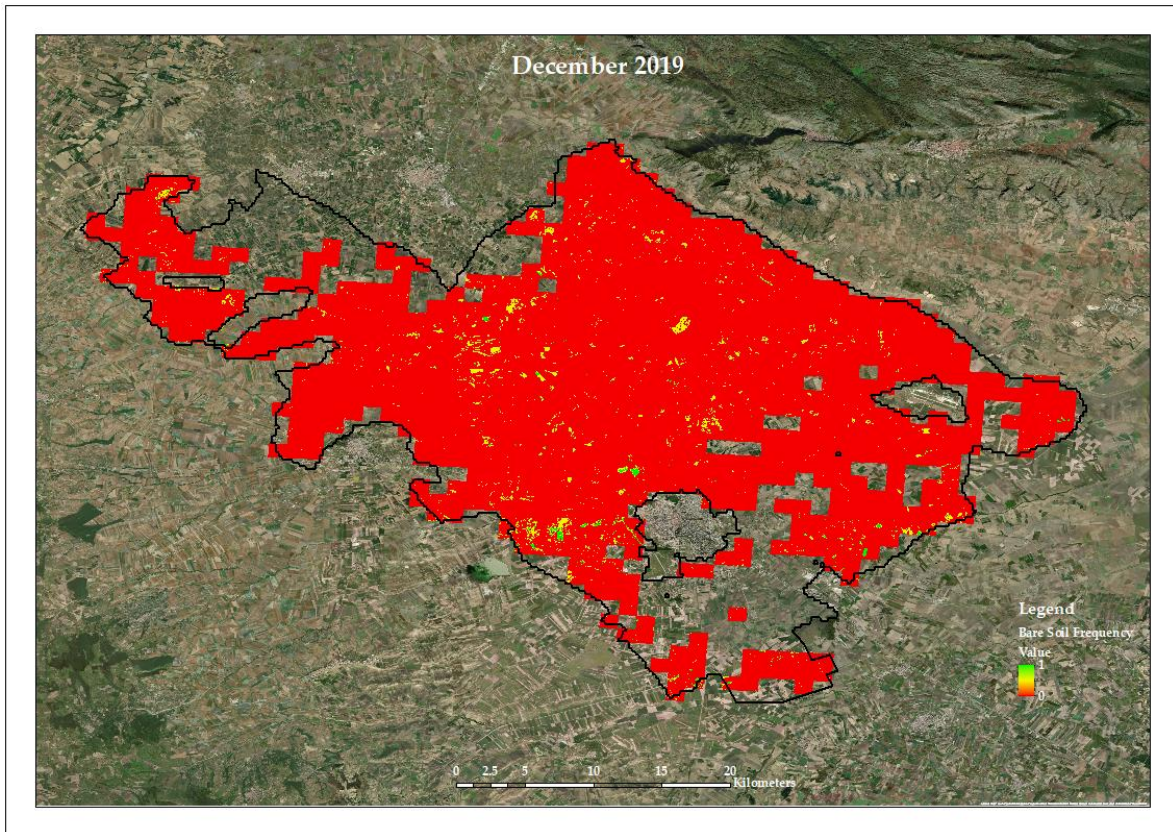

**Figure S12.** Yearly Bare Soil Frequency of the Capitanata region for the agricultural year 2019.
